# Supplementary material for: Synthesis of 2-Amino-N′-aroyl(het)arylhydrazides, DNA Photocleavage, Molecular Docking and Cytotoxicity Studies against Melanoma CarB Cell Lines
Source: MDPI journal article supplement (doi:10.3390/molecules29030647), 2024-01-30
Supplement: s1 [file s1]

# Supporting Information

## Synthesis of 2-Amino-*N'*-aroyl(het)arylhydrazides, DNA Photocleavage, Molecular Docking and Cytotoxicity Studies Against Melanoma CarB Cell Lines

Achilleas Mitrakas<sup>1</sup>, Maria-Eleni Stathopoulou<sup>2</sup>, Chrysoula Mikra<sup>3</sup>, Chrystalla Konstantinou<sup>2</sup>, Stergios Rizos<sup>4</sup>, Stella Malichetoudi<sup>1</sup>, Alexandros E. Koumbis<sup>3</sup>, Maria Koffa<sup>1</sup> and Konstantina C. Fylaktakidou<sup>2,3,\*</sup>

<sup>1</sup> Laboratory of Cellular Biology and Cell Cycle, Molecular Biology and Genetics Department, Democritus University of Thrace, University Campus, Dragana, 68100 Alexandroupolis, Greece; amitrak@med.duth.gr (A.M.); stelmalil@mbg.duth.gr (S.M.); mkoffa@mbg.duth.gr (M.K.)

<sup>2</sup> Laboratory of Organic, Bioorganic and Natural Product Chemistry, Molecular Biology and Genetics Department, Democritus University of Thrace, 68100 Alexandroupolis, Greece; marialenastathopoulou@outlook.com (M.-E.K.S.); chrystallakon@outlook.com (C.K.)

<sup>3</sup> Laboratory of Organic Chemistry, Faculty of Chemistry, Aristotle University of Thessaloniki, GR-54124 Thessaloniki, Greece; chrmikgeo@chem.auth.gr (C.M.); akoumbis@chem.auth.gr (A.E.K.)

<sup>4</sup> Department of Chemistry and Chemical Biology, Harvard University, 12 Oxford St., Cambridge, MA 02138, USA; stergiosrizos@fas.harvard.edu

\* Correspondence: kfylakta@chem.auth.gr

## Table of contents

|     |                                                                                                  |     |
|-----|--------------------------------------------------------------------------------------------------|-----|
| S.1 | <i>Copies of NMR spectra of compounds 1-24 and HRMS measurements</i>                             | S3  |
| S.2 | <i>Gel electrophoresis pictures of compounds 1-24 and AA IIa-h (UV-B)</i>                        | S51 |
| S.3 | <i>Gel electrophoresis pictures of compound 9. Concentration, pH, mechanistic studies (UV-B)</i> | S55 |
| S.4 | <i>UV-Vis Spectra of compounds 1-24</i>                                                          | S57 |
| S.5 | <i>Gel electrophoresis pictures of compounds 1-24 (UV-A)</i>                                     | S60 |
| S.6 | <i>Optimized molecular geometries of compounds 1-24 at B3LYP/6-31G (d) level</i>                 | S64 |
| S.7 | <i>Molecular Docking Studies for the compounds 1-24</i>                                          | S66 |

## S.1. Copies of NMR spectra of compounds 1-24 and HRMS measurements

### 2-amino-*N'*-benzoylbenzohydrazide (1)

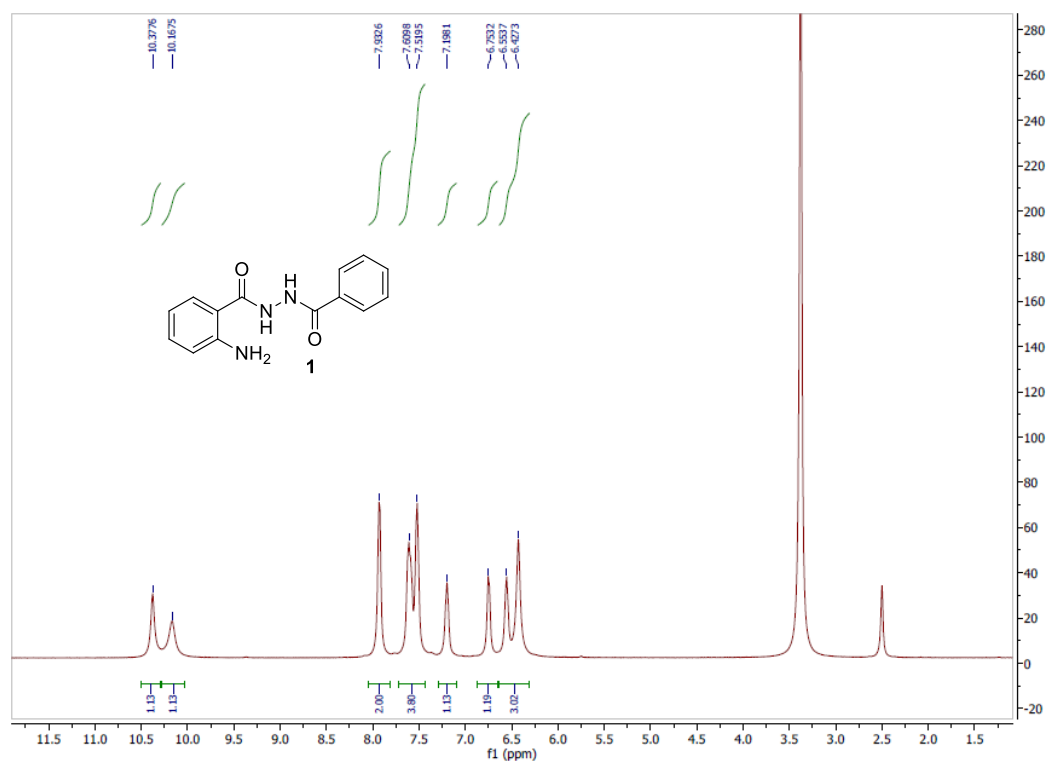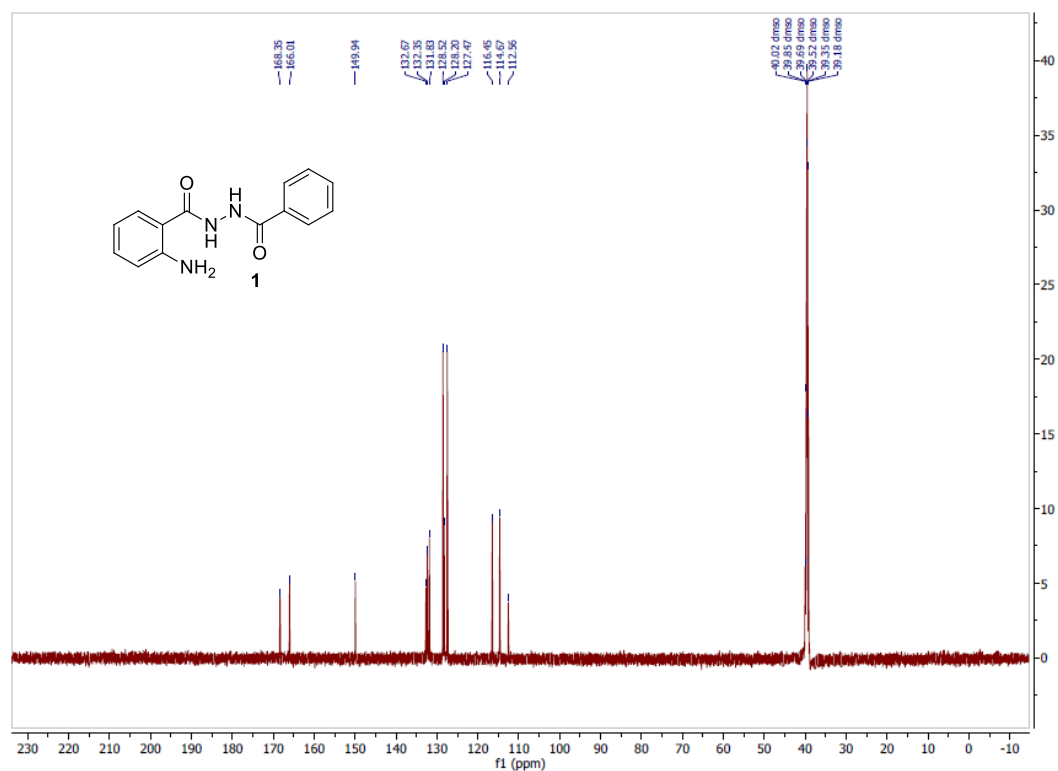

MS16\_FYLA\_K\_Recal #499 RT: 8.06 AV: 1 NL: 2.66E8  
T: FTMS + p ESI Full ms [200.00-1500.00]

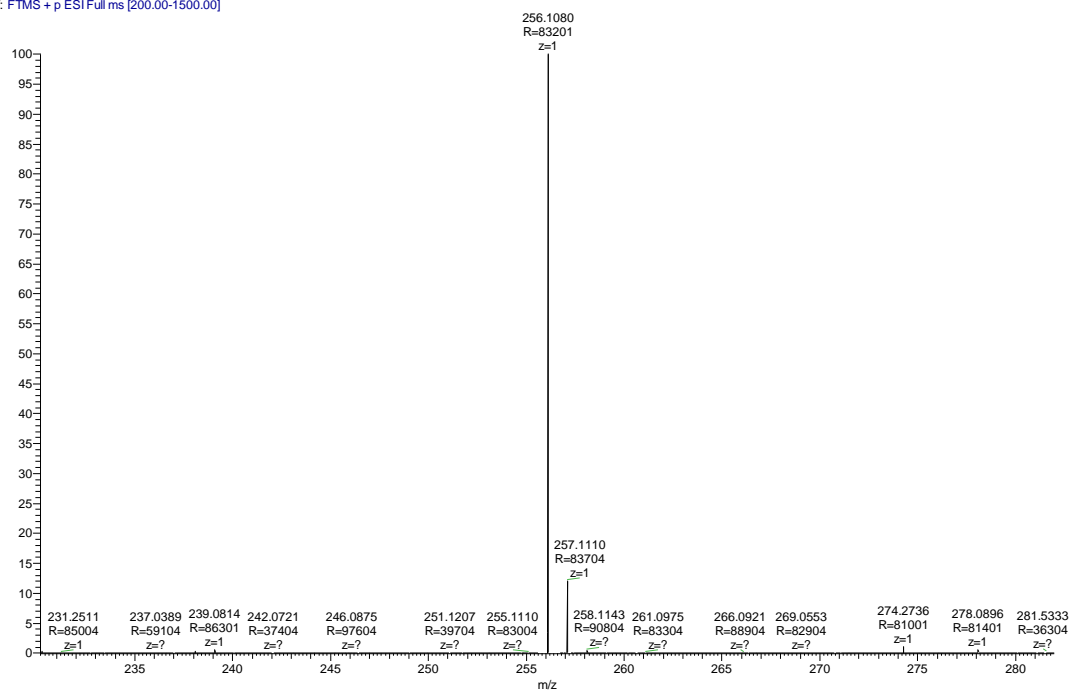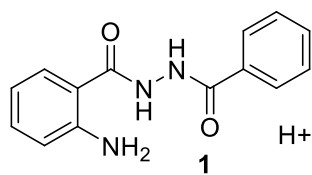

Chemical Formula:  $C_{14}H_{14}N_3O_2^+$   
Exact Mass: 256,1081

2-amino-*N'*-(4-chlorobenzoyl)benzohydrazide (**2**)

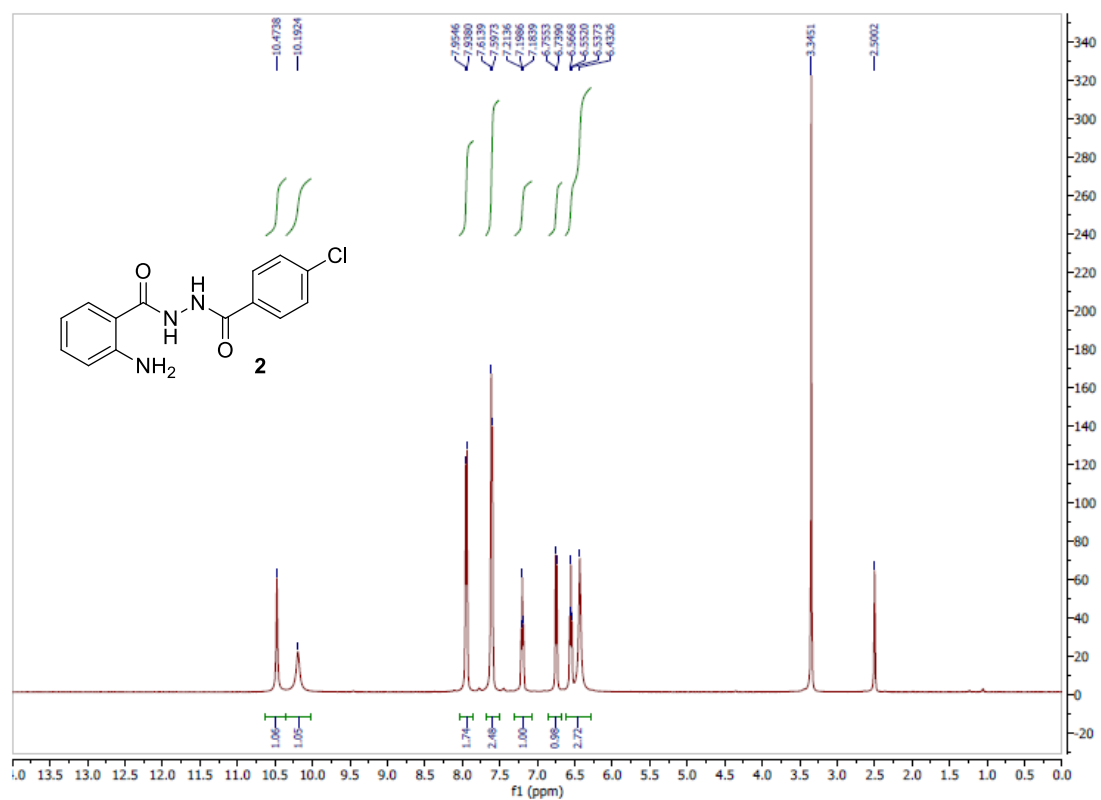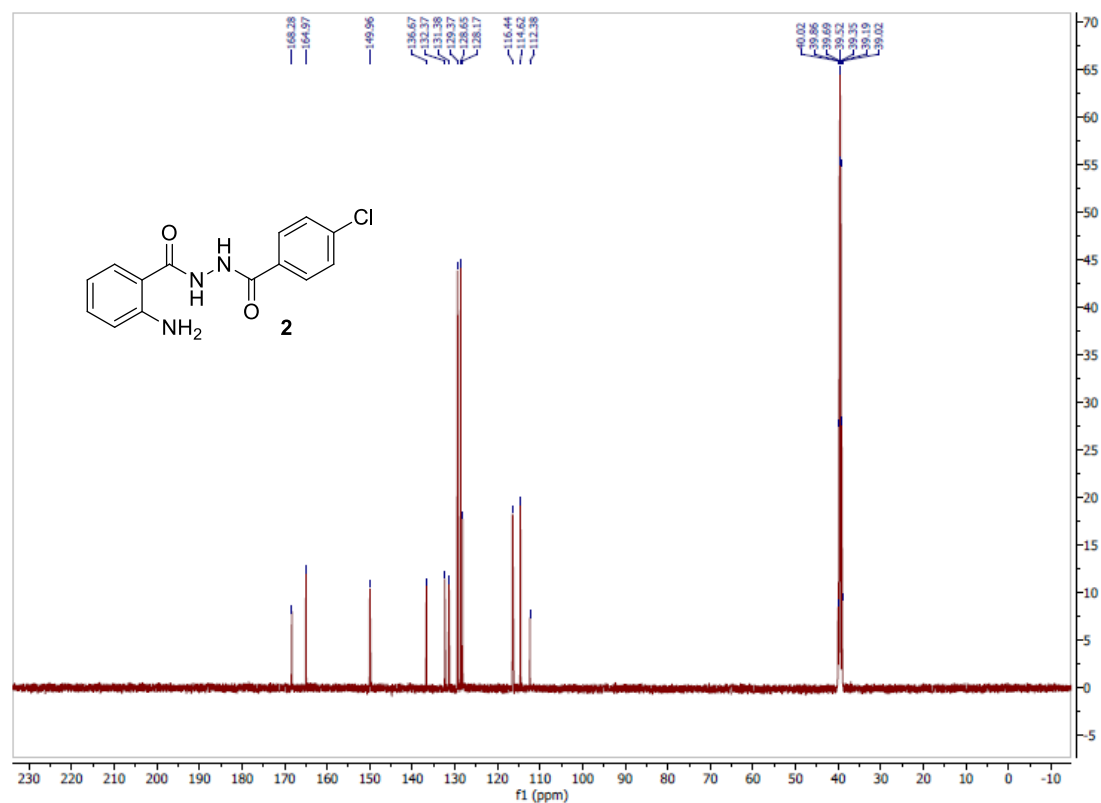

7: 181210123101 #249 RT: 3.65 AV: 1 NL: 3.09E6  
T: FTMS • p ESI Full ms [150.00-500.00]

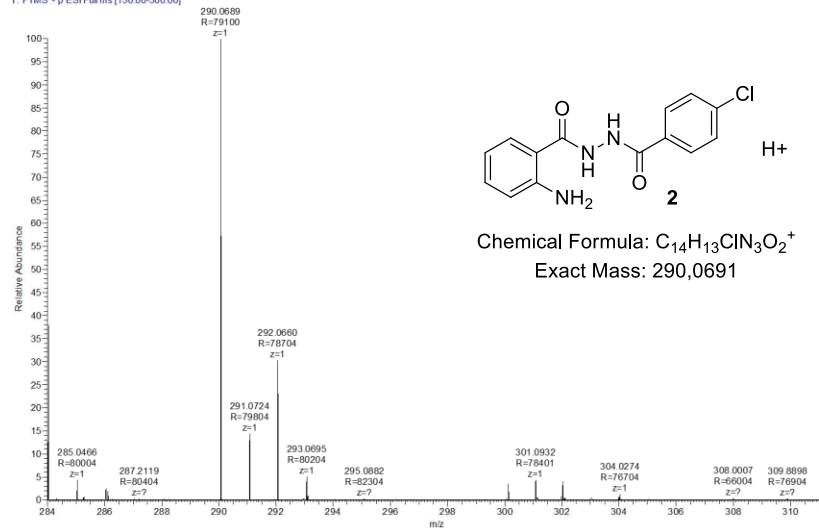

2-amino-*N'*-(4-nitrobenzoyl)benzohydrazide (**3**)

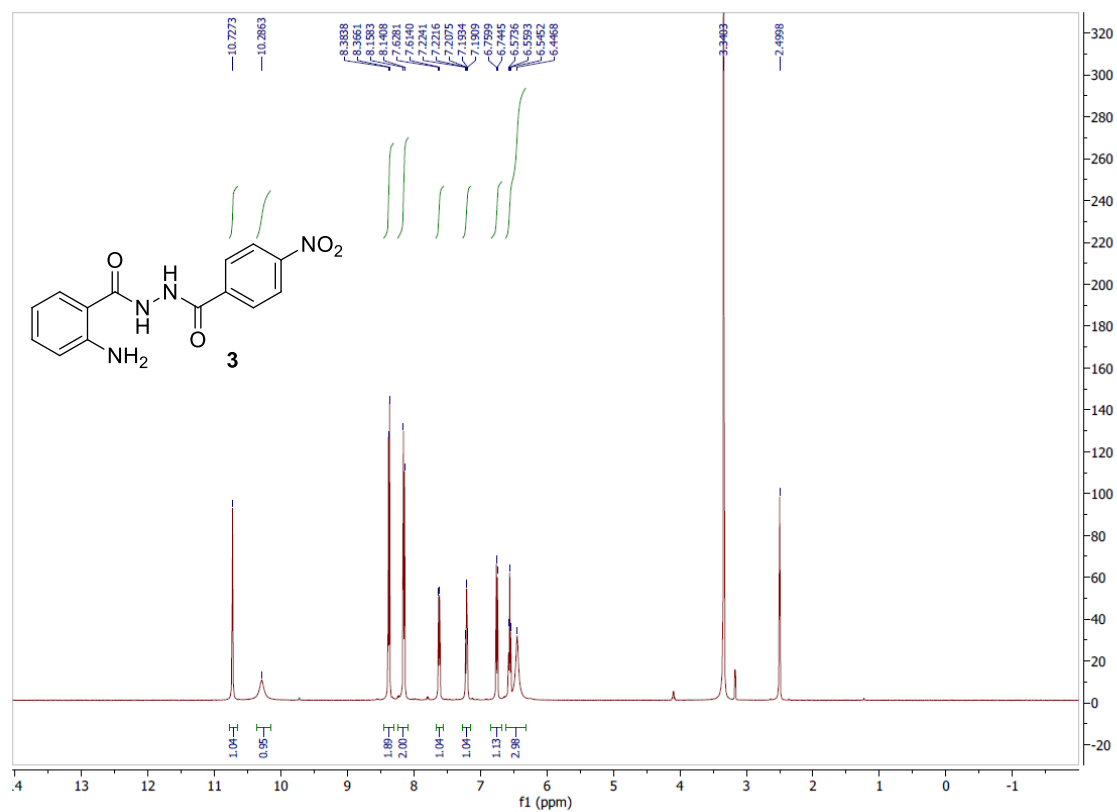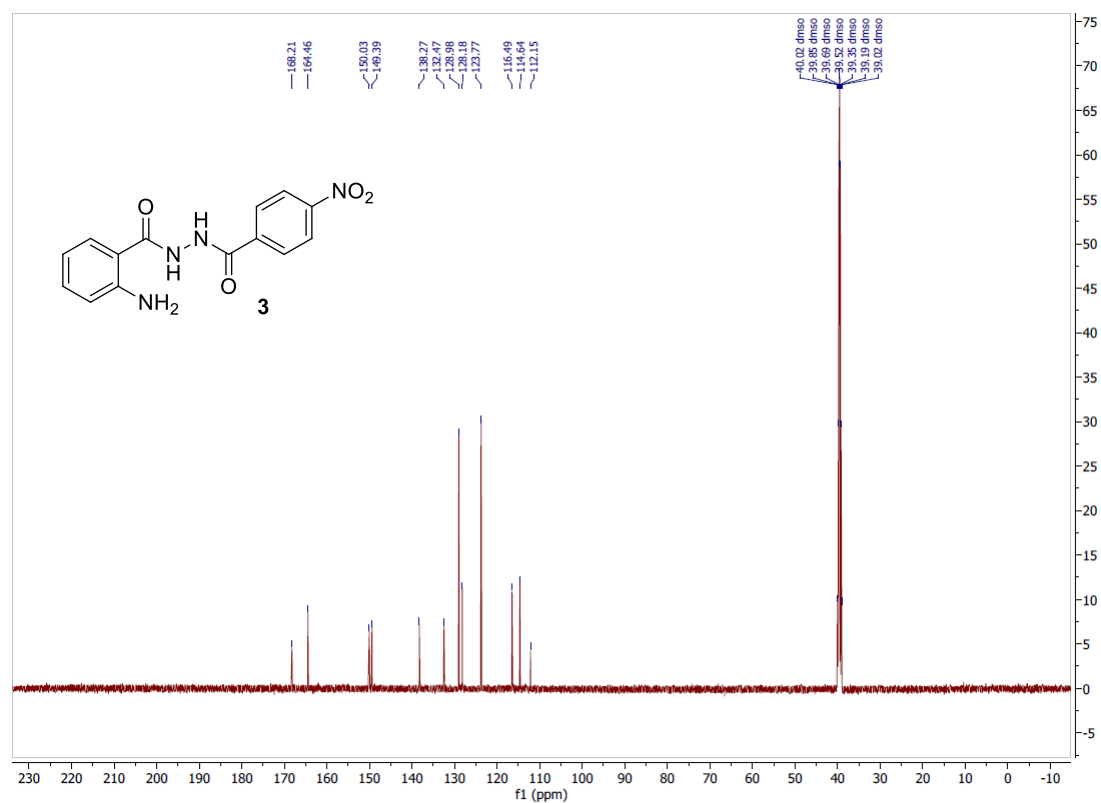

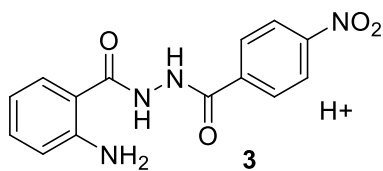

Chemical Formula:  $C_{14}H_{13}N_4O_4^+$

Exact Mass: 301,0931

i13\_fylak\_Recal #197 RT: 2.93 AV: 1 NL: 5.69E7  
T: FTMS + p ESI Full ms [200.00-1500.00]

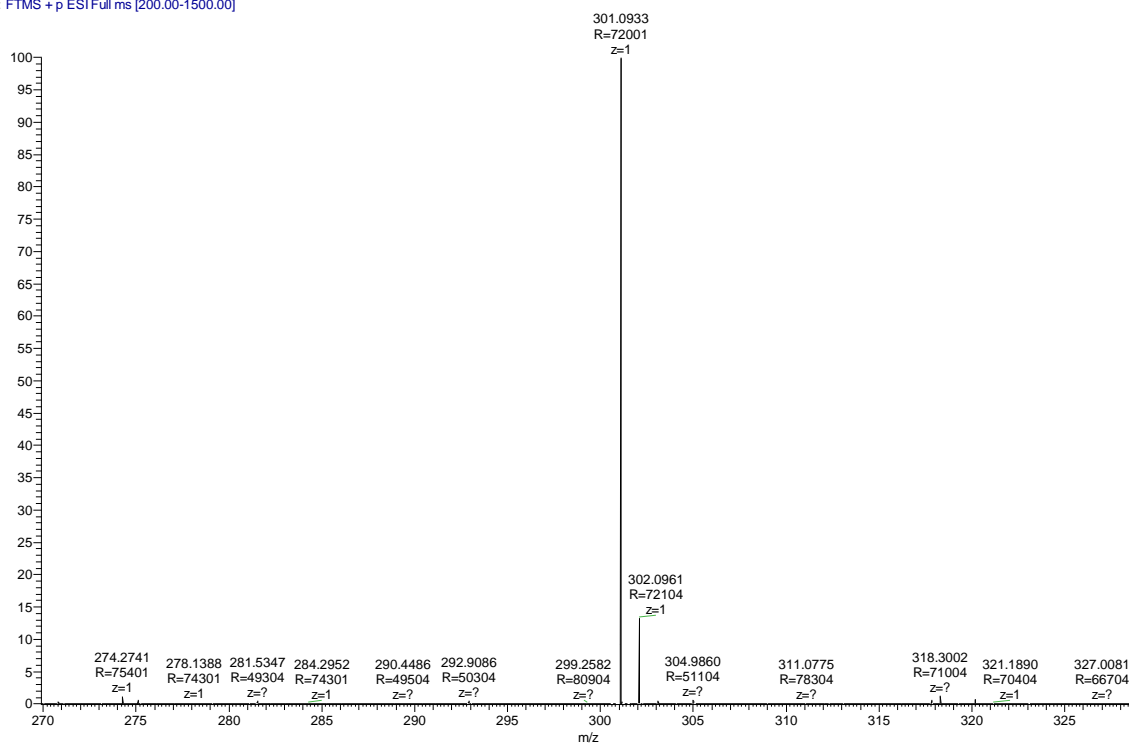



*N'*-(2-aminobenzoyl)furan-2-carbohydrazide (**4**)

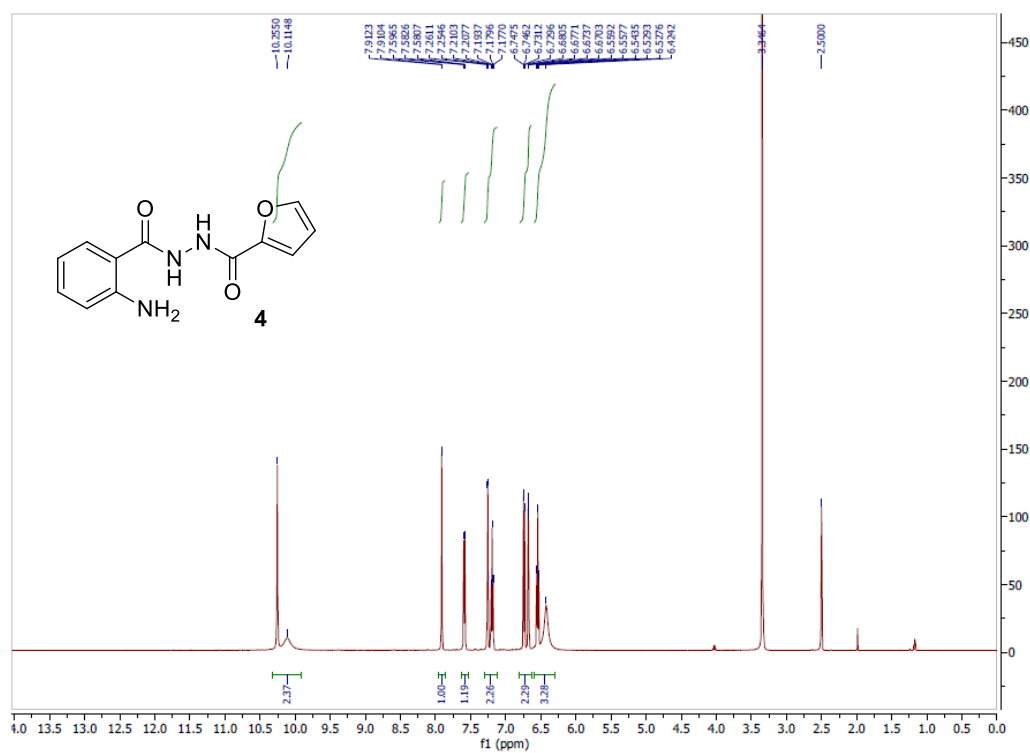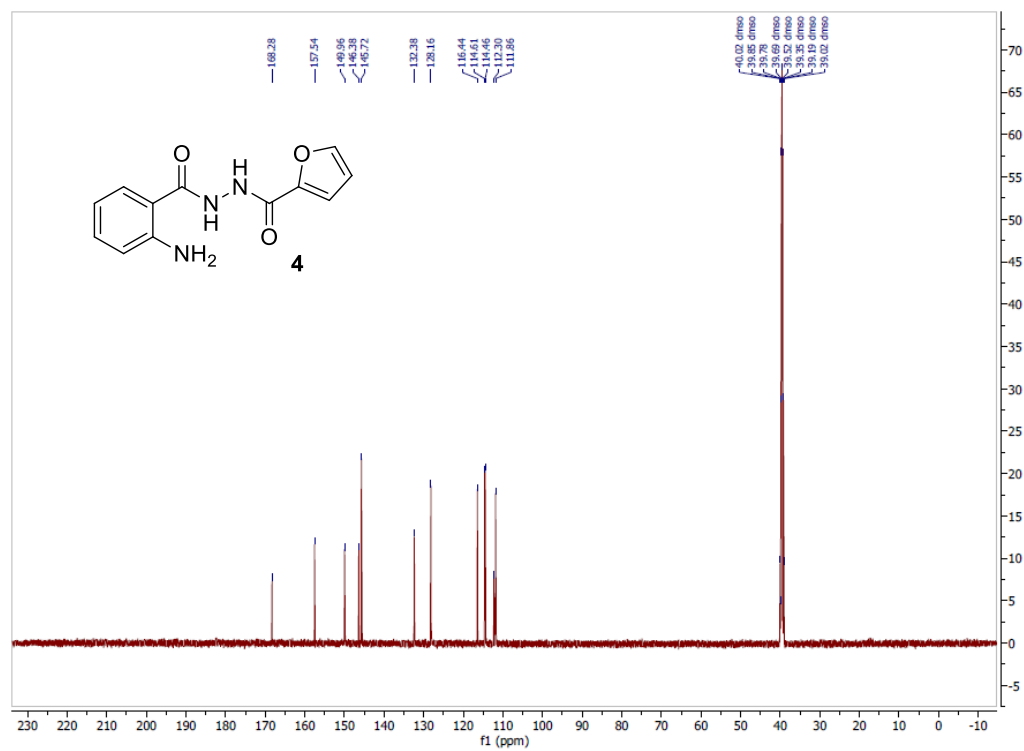

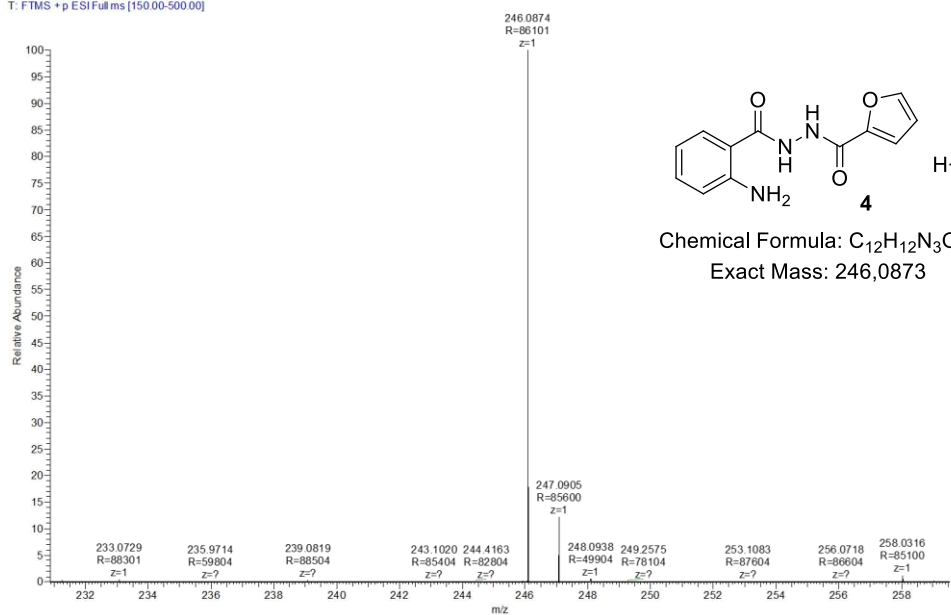

2-amino-*N'*-benzoyl-5-chlorobenzohydrazide (5)

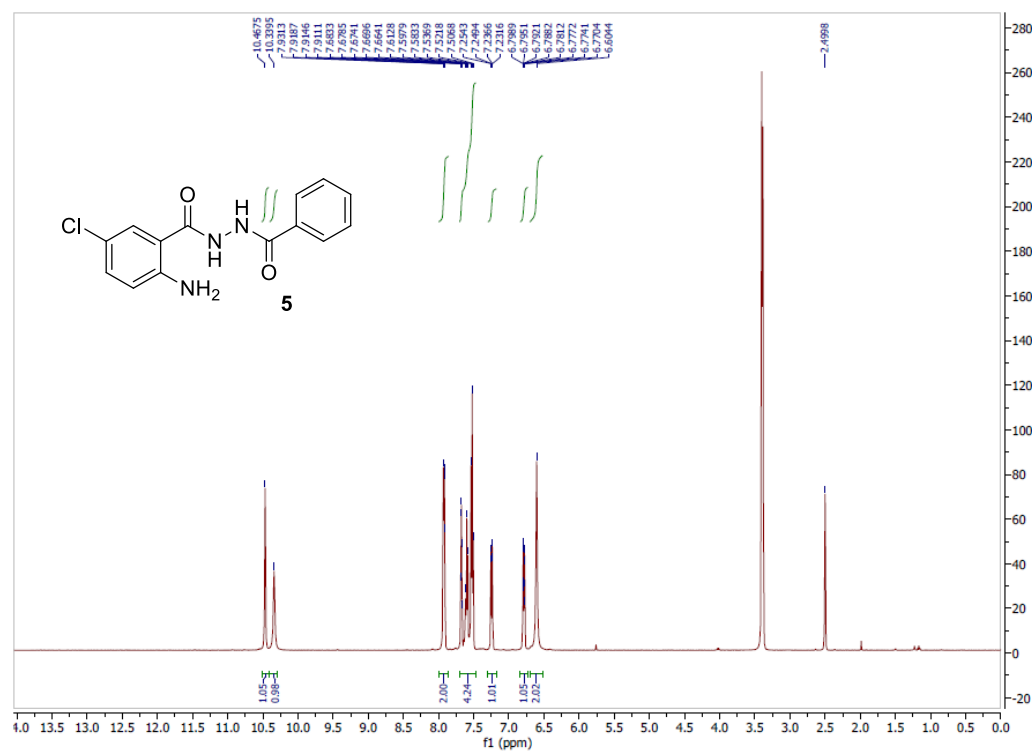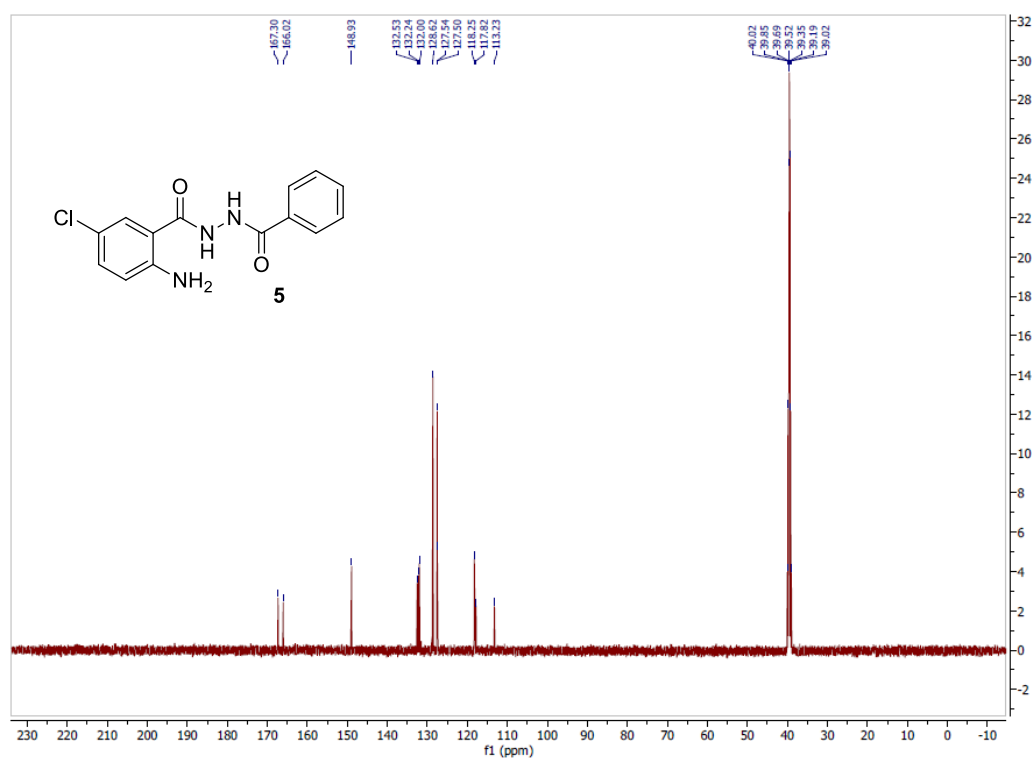

5 #145 RT: 3.59 AV: 1 NL: 6.81E6  
T: FTMS + p ESI Full ms [150.00-500.00]

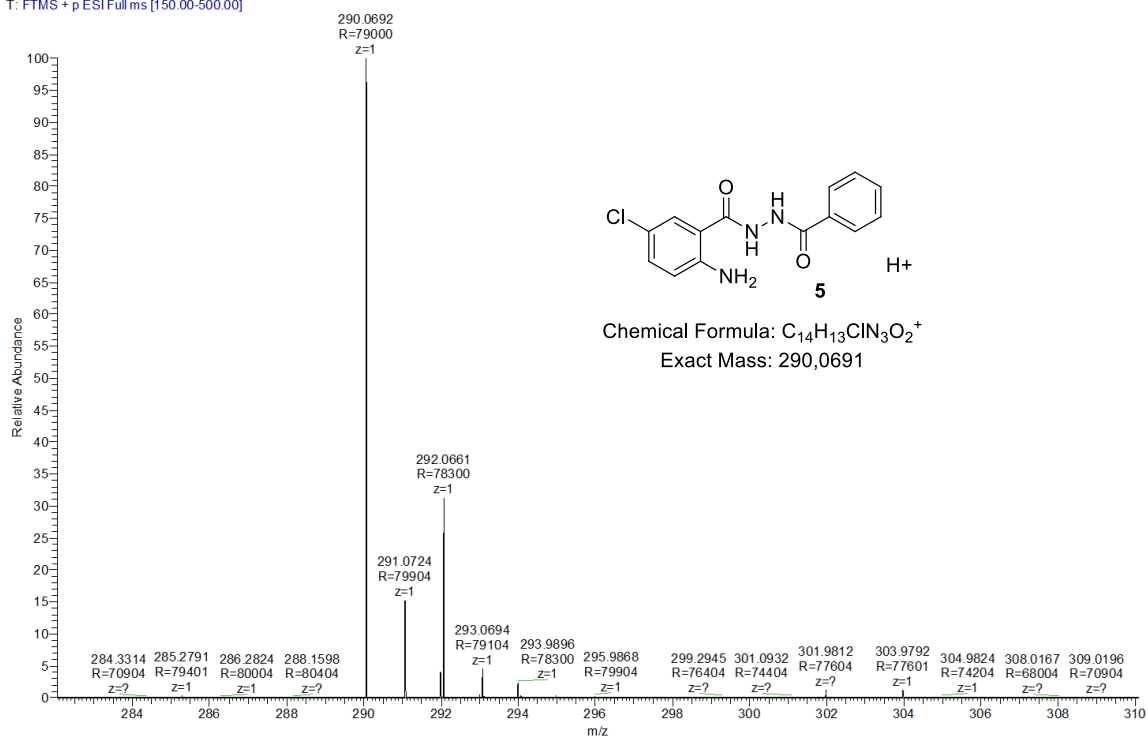

2-amino-5-chloro-*N'*-(4-chlorobenzoyl)benzohydrazide (**6**)

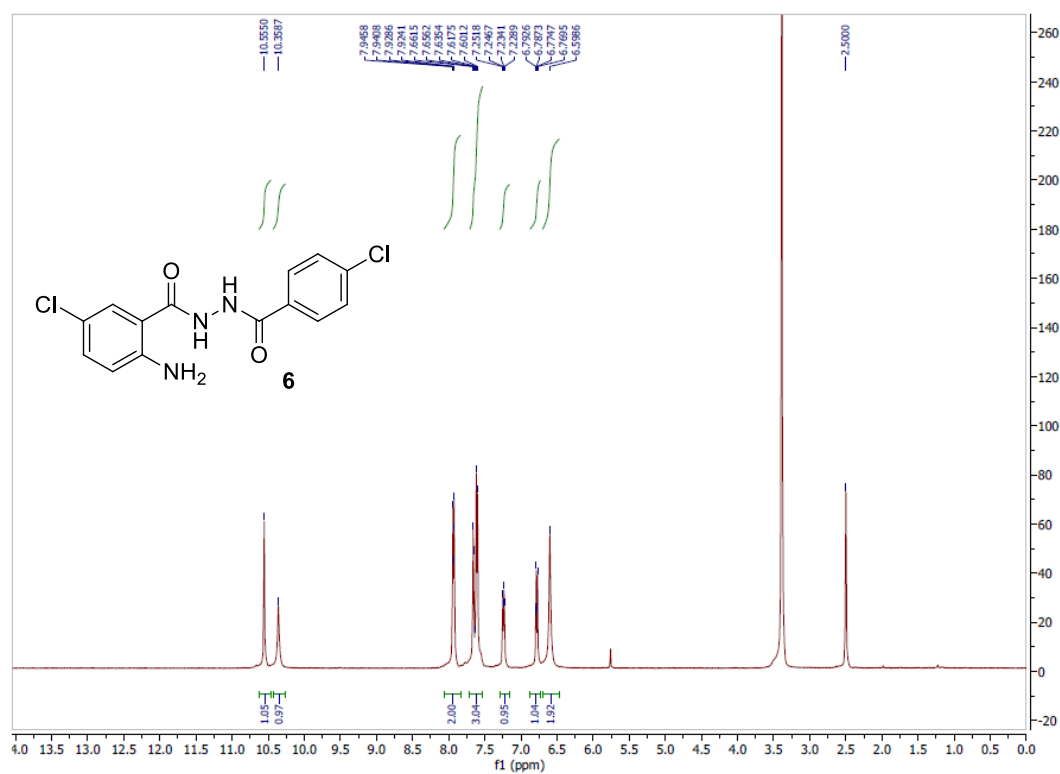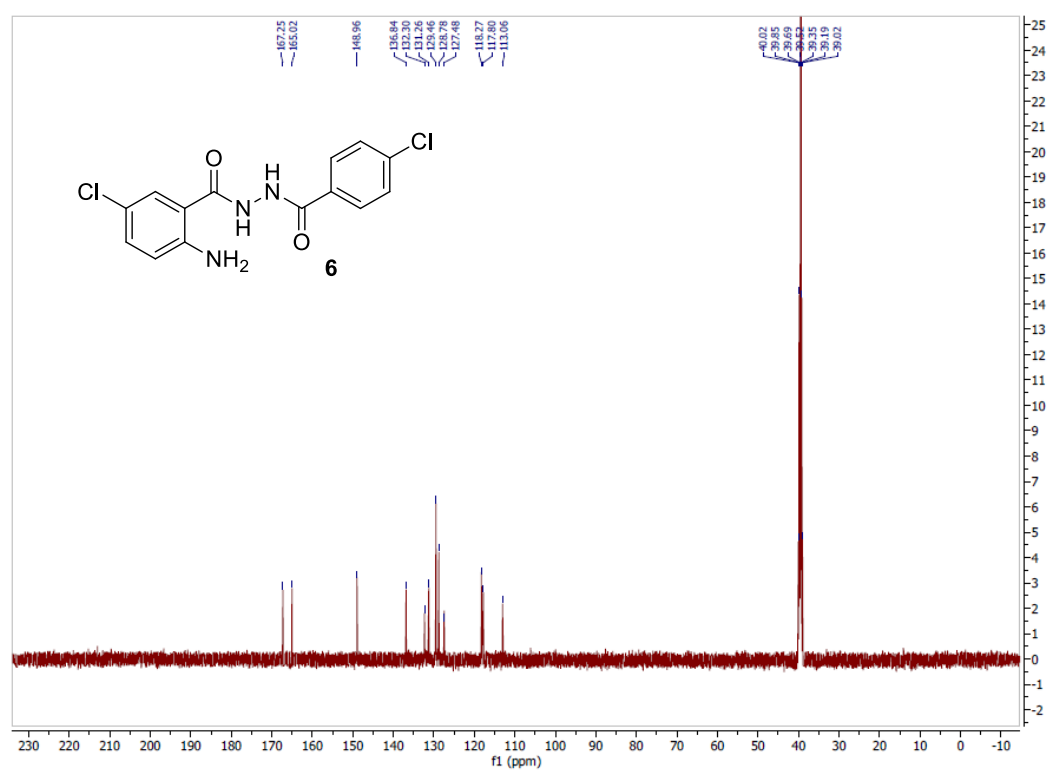

5 #145 RT: 3.59 AV: 1 NL: 1.25E6  
T: FTMS + p ESI Full ms [150.00-500.00]

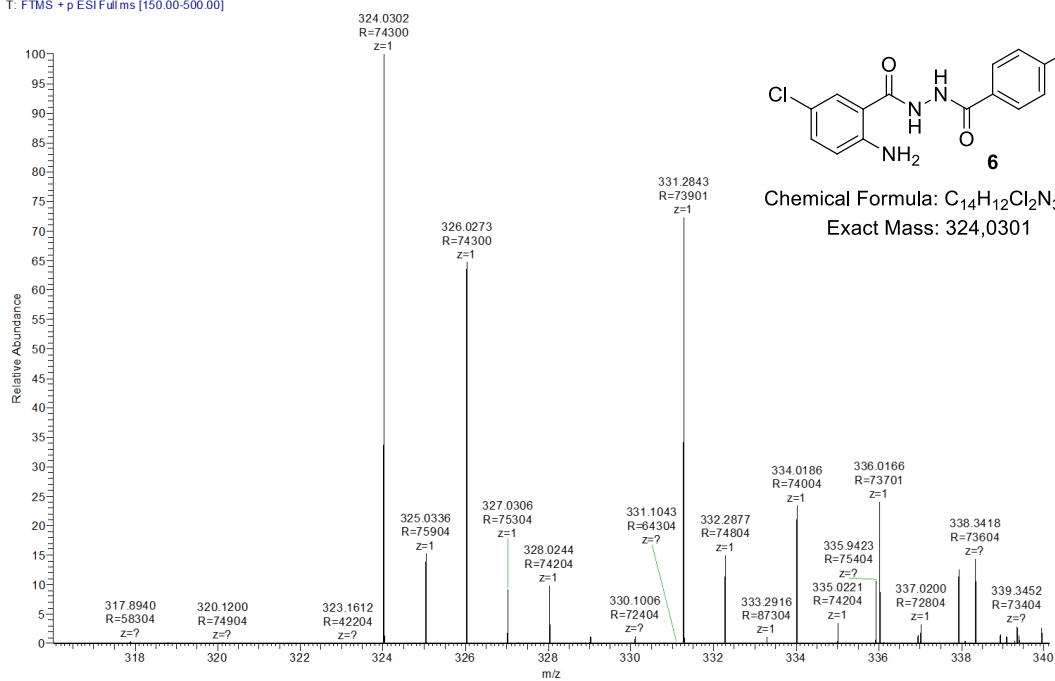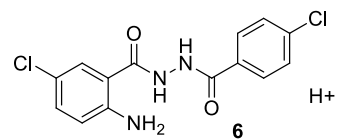

Chemical Formula:  $C_{14}H_{12}Cl_2N_3O_2^+$   
Exact Mass: 324,0301

2-amino-5-chloro-*N'*-(4-nitrobenzoyl)benzohydrazide (7)

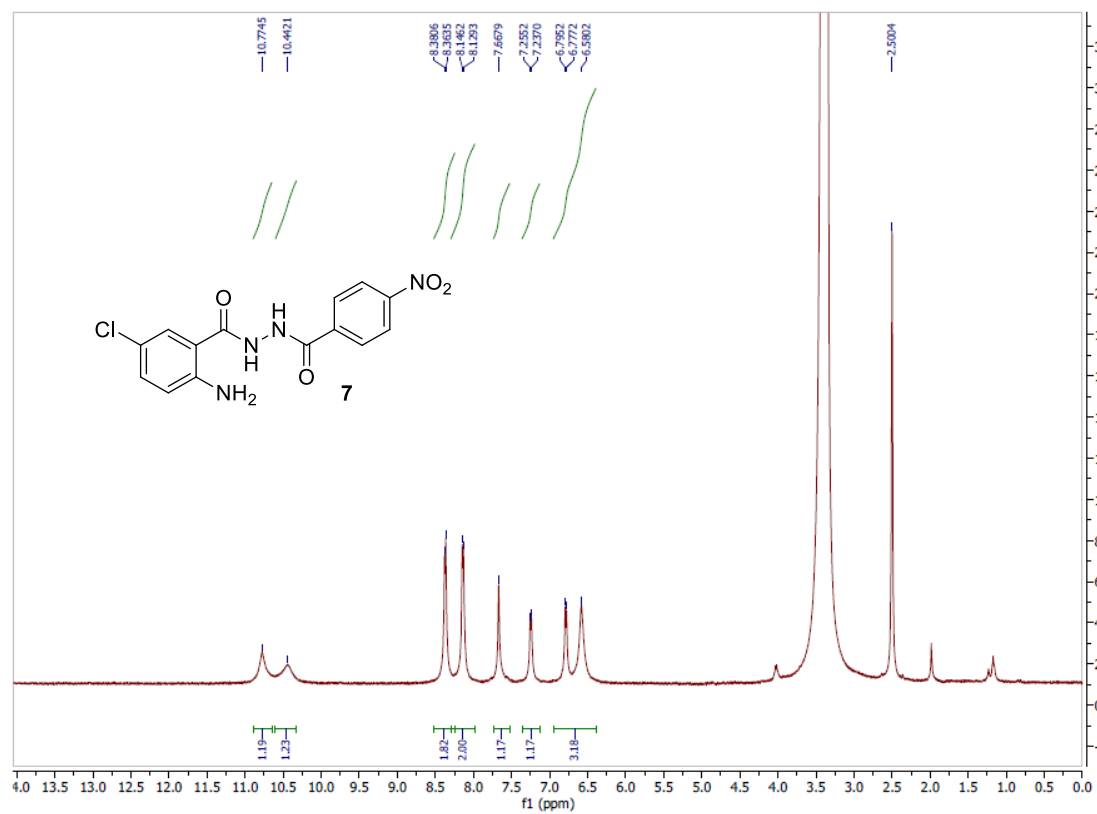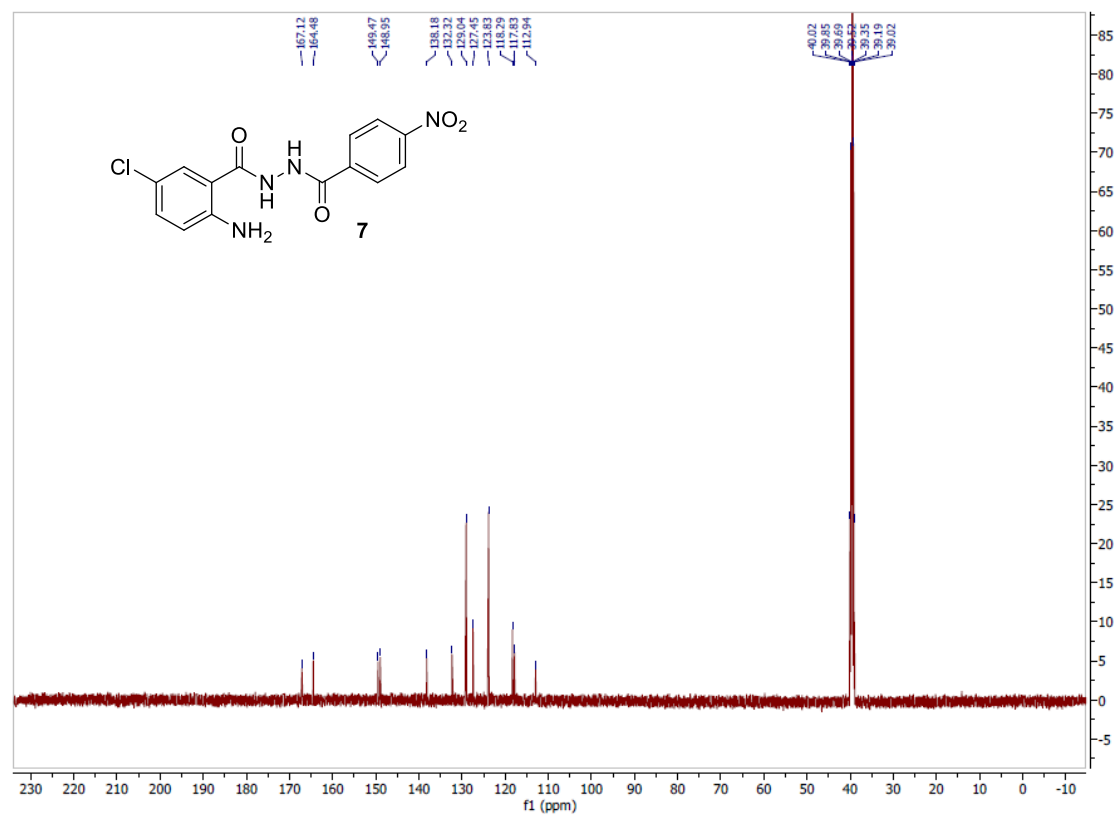

WASH\_181210123101 #490 RT: 7.08 AV: 1 NL: 3.59E6  
T: FTMS +p ESIFulms [150.00-500.00]

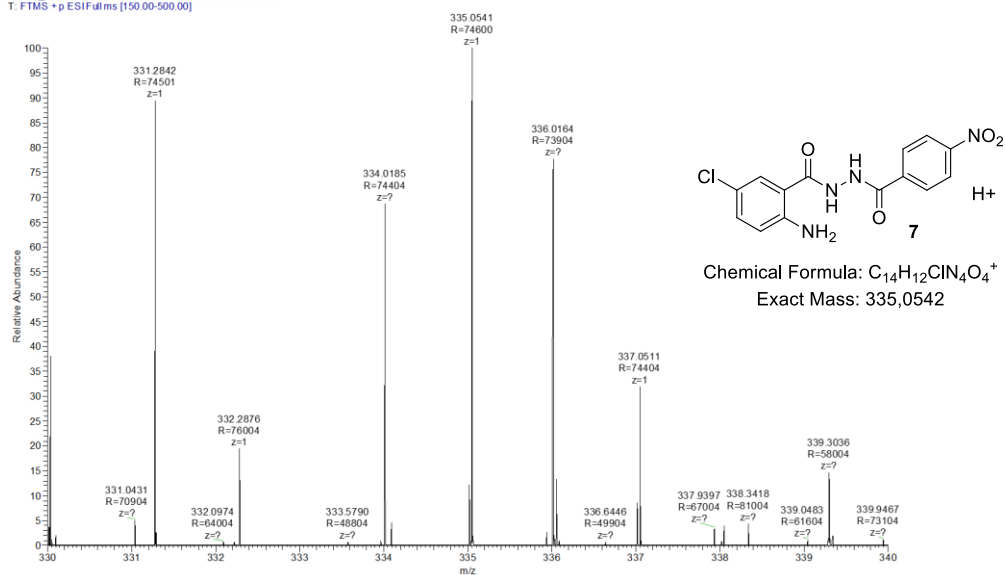



*N'*-(2-amino-5-chlorobenzoyl)furan-2-carbohydrazide (**8**)

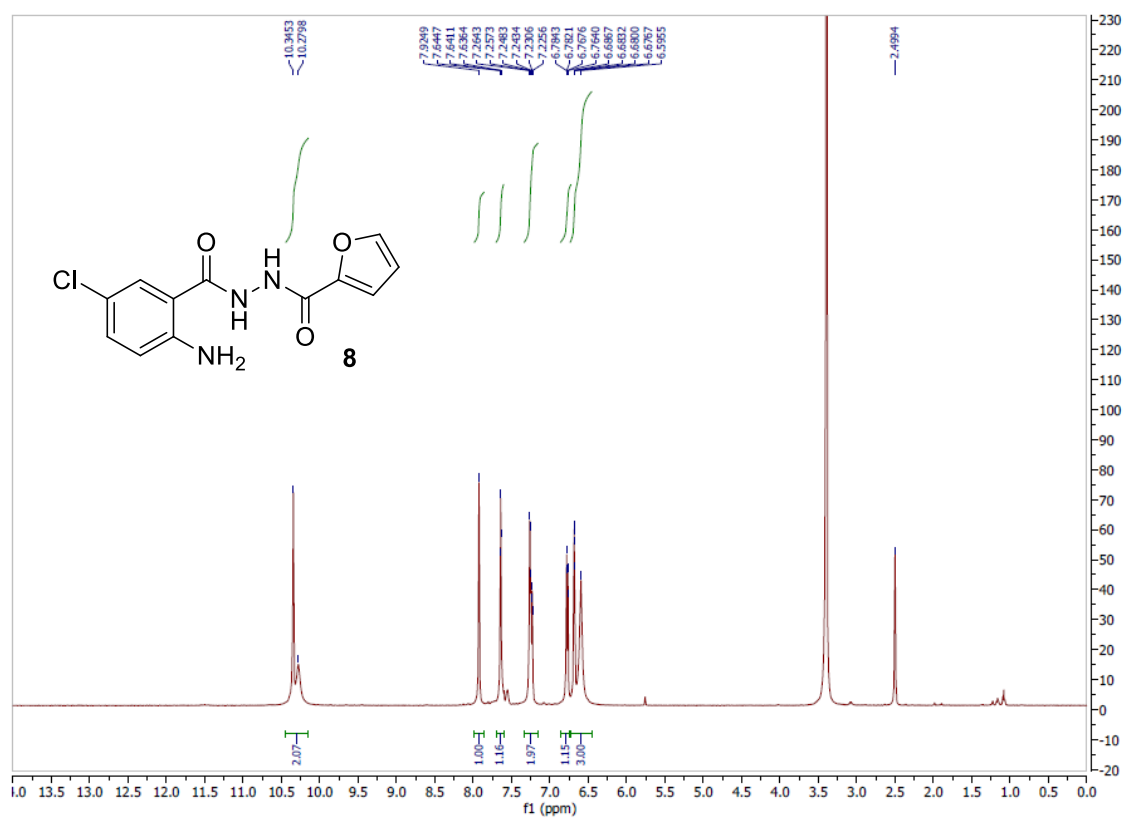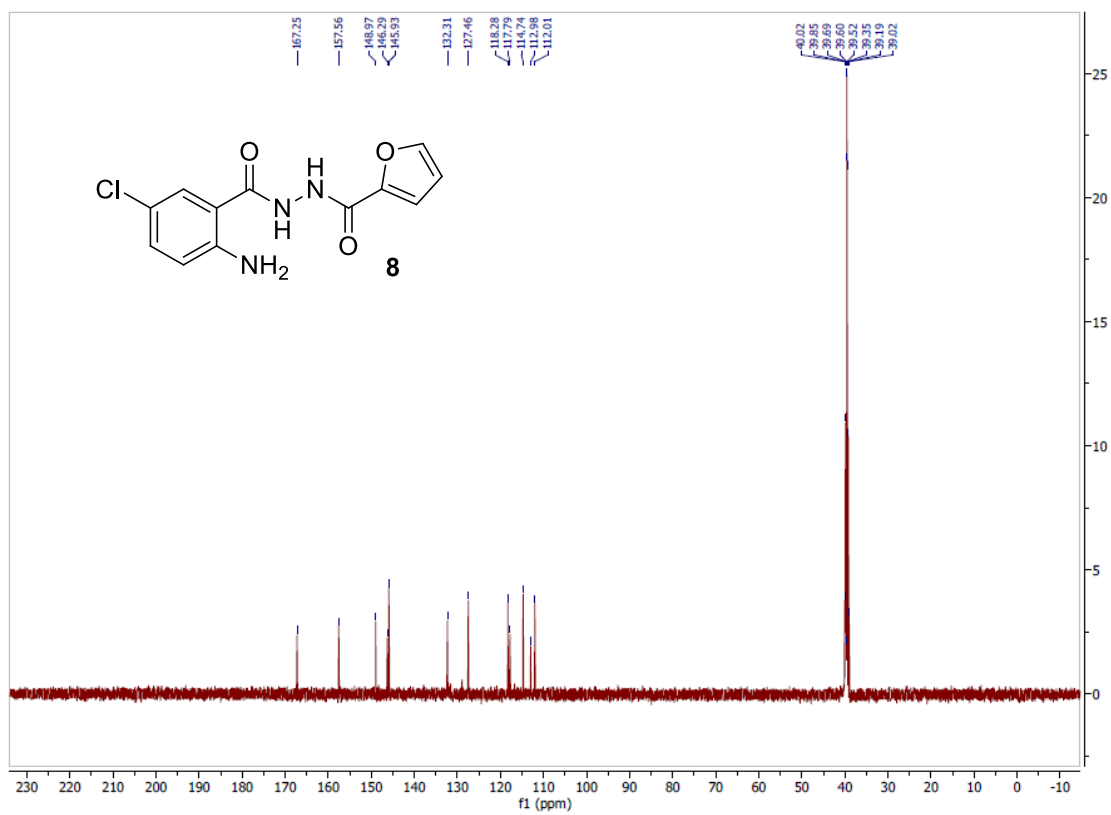

8.2 #1-3 RT: 0.01-0.03 AV: 3 NL: 2.77E7  
T: FTMS + p ESIFull ms [100.00-600.00]

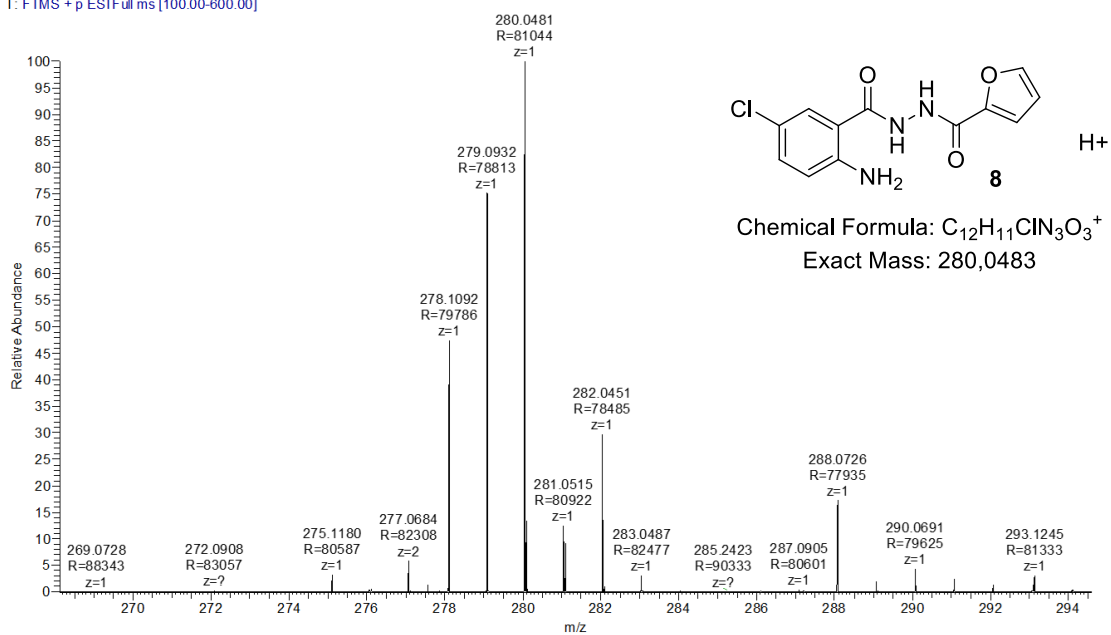

2-amino-*N'*-benzoyl-5-bromobenzohydrazide (**9**)

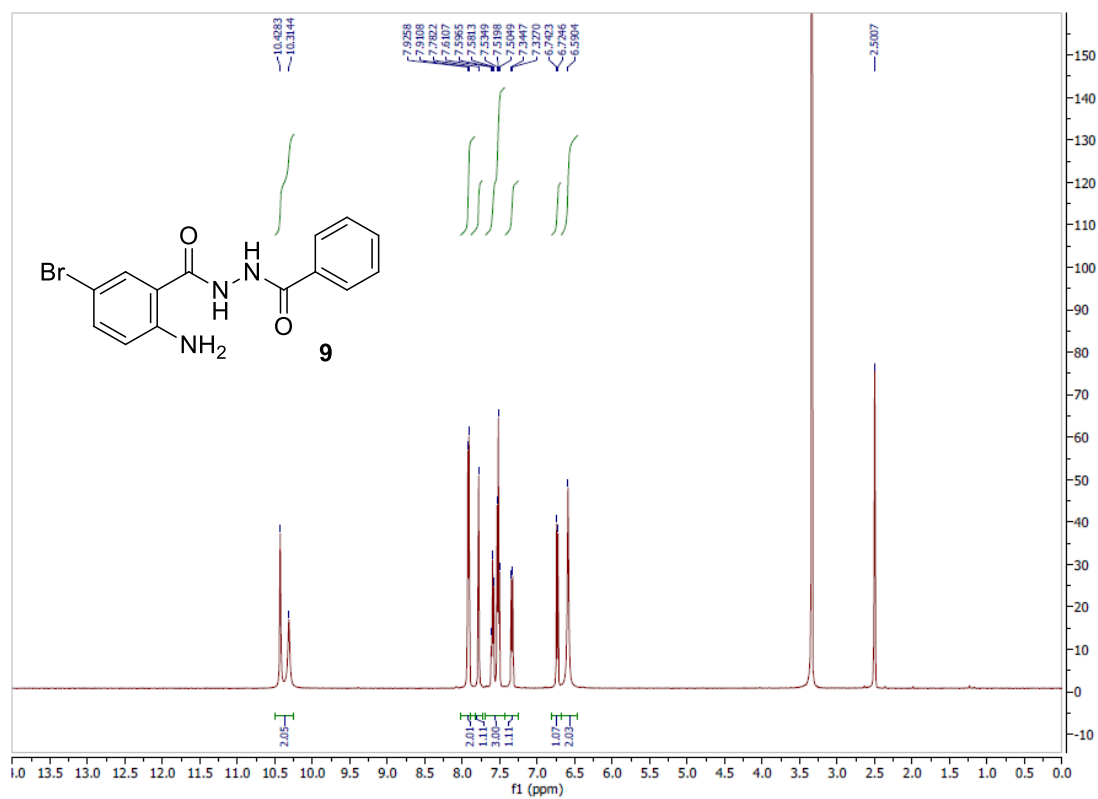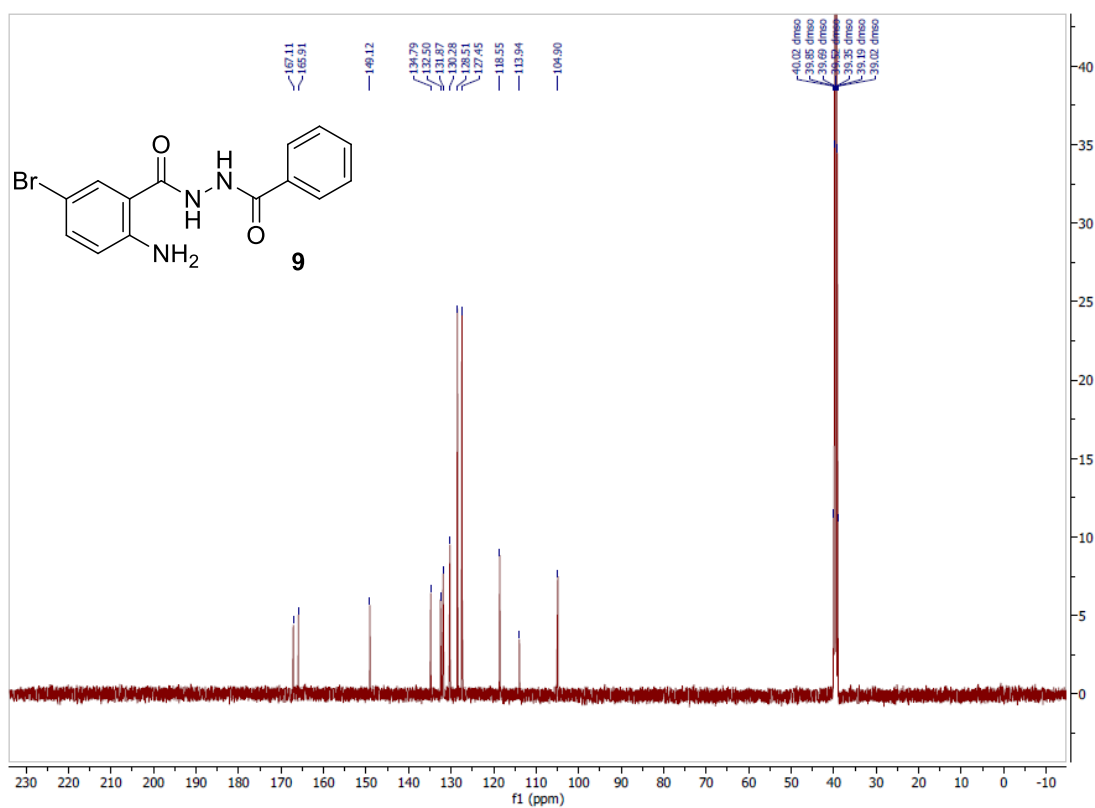

5\_181210123101 #492-501 RT: 8.51-8.64 AV: 10 NL: 5.71E5  
T: FTMS + p ESI Full ms [150.00-500.00]

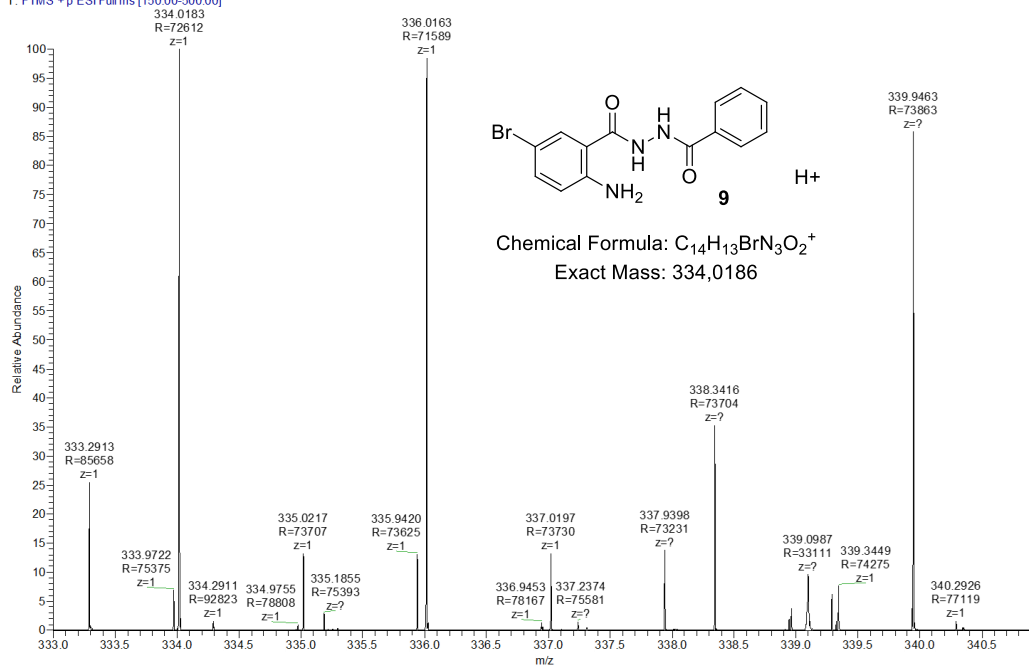

2-amino-5-bromo-*N'*-(4-chlorobenzoyl)benzohydrazide (**10**)

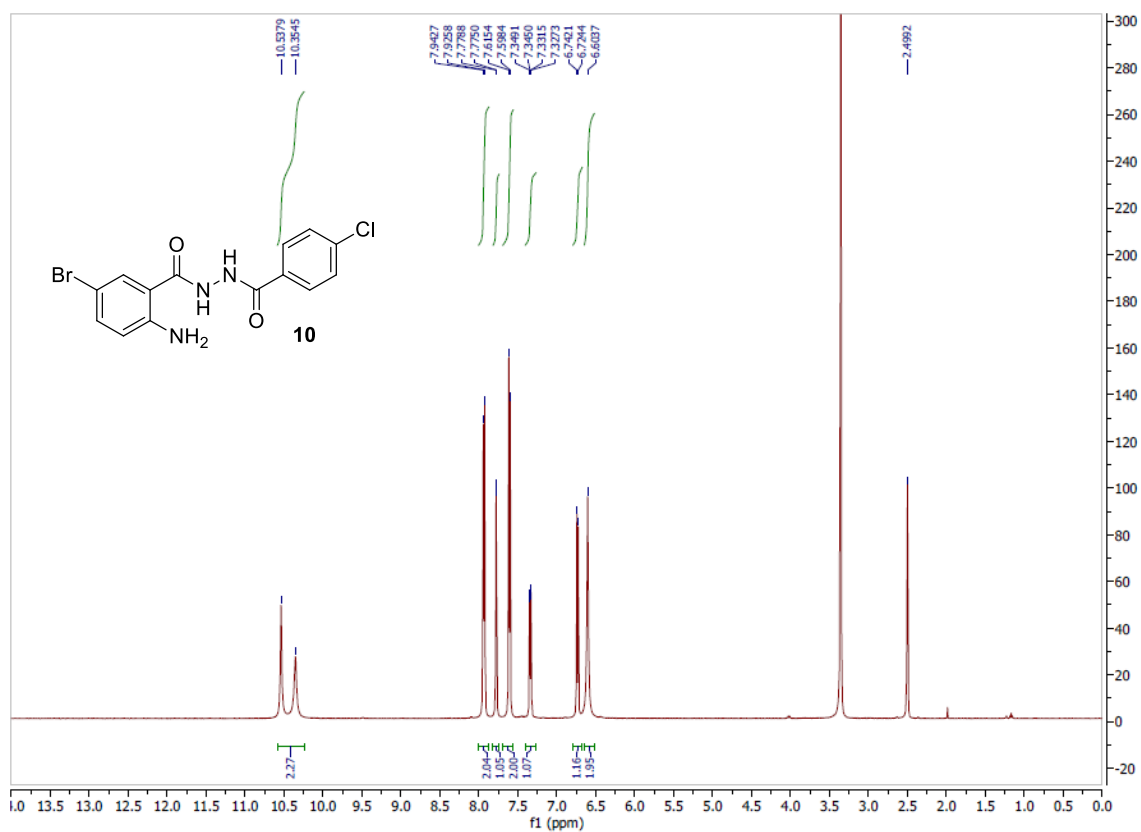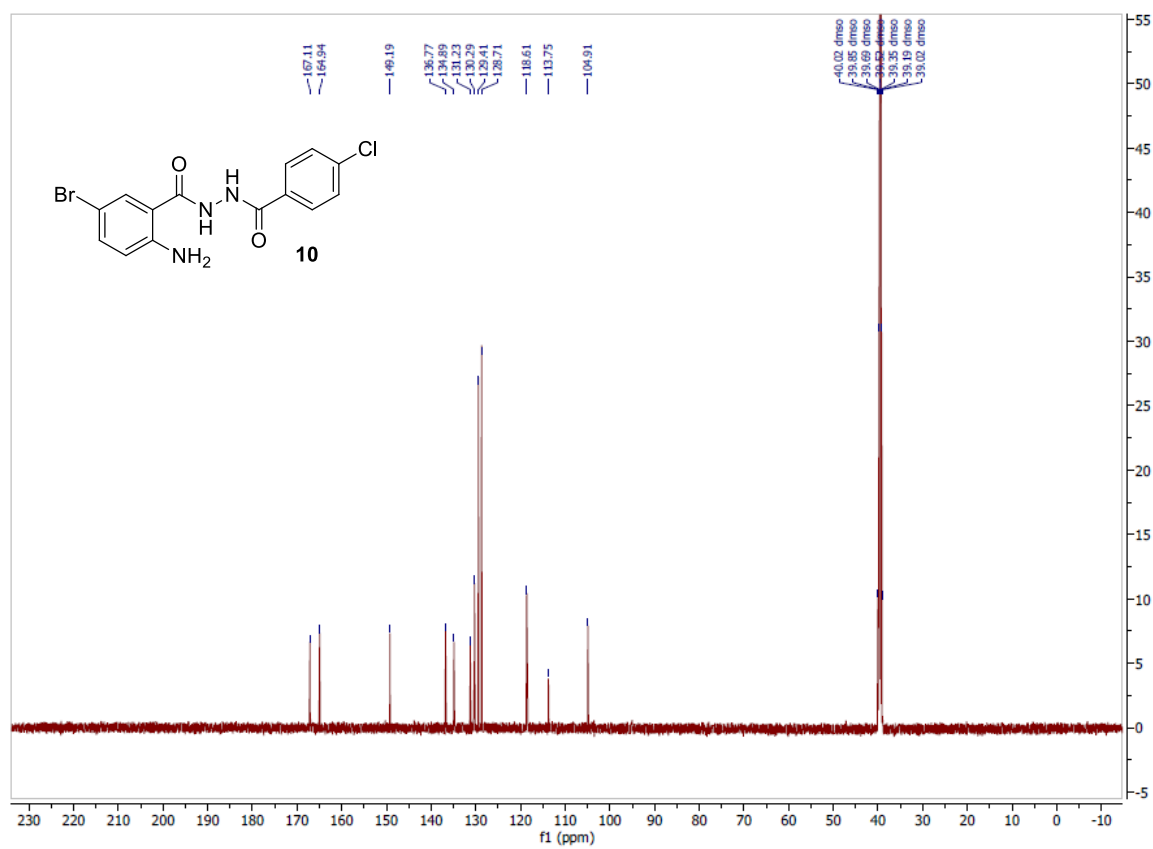

5#144-147 RT: 3.54-3.67 AV: 4 NL: 8.86E5  
T: FTMS + p ESIFulms [150.00-500.00]

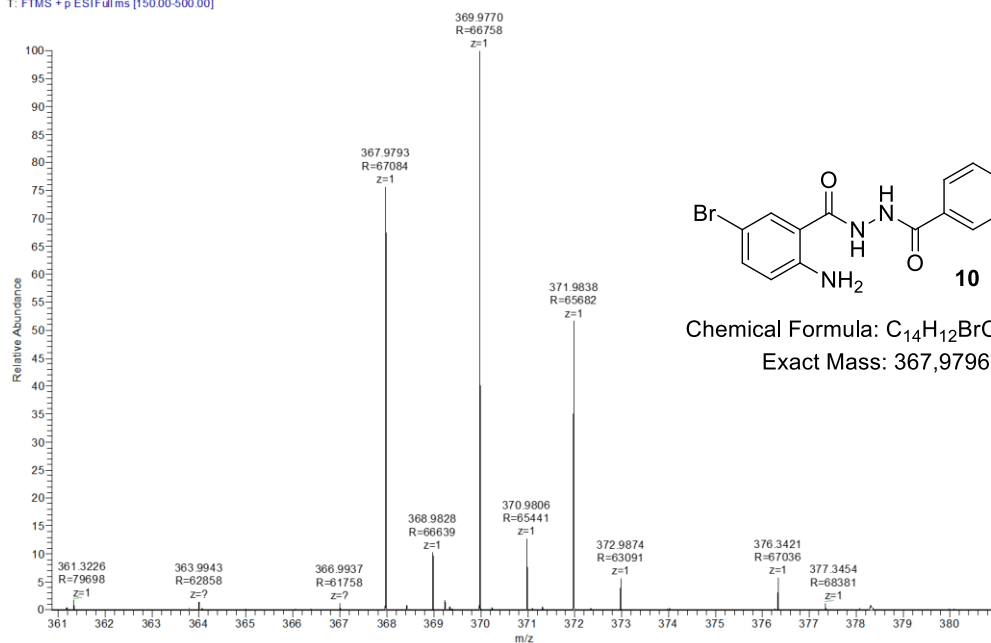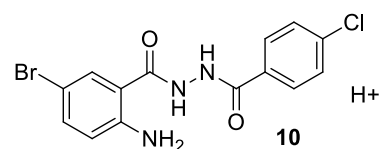

Chemical Formula:  $C_{14}H_{12}BrClN_3O_2^+$   
Exact Mass: 367,9796

2-amino-5-bromo-*N'*-(4-nitrobenzoyl)benzohydrazide (**11**)

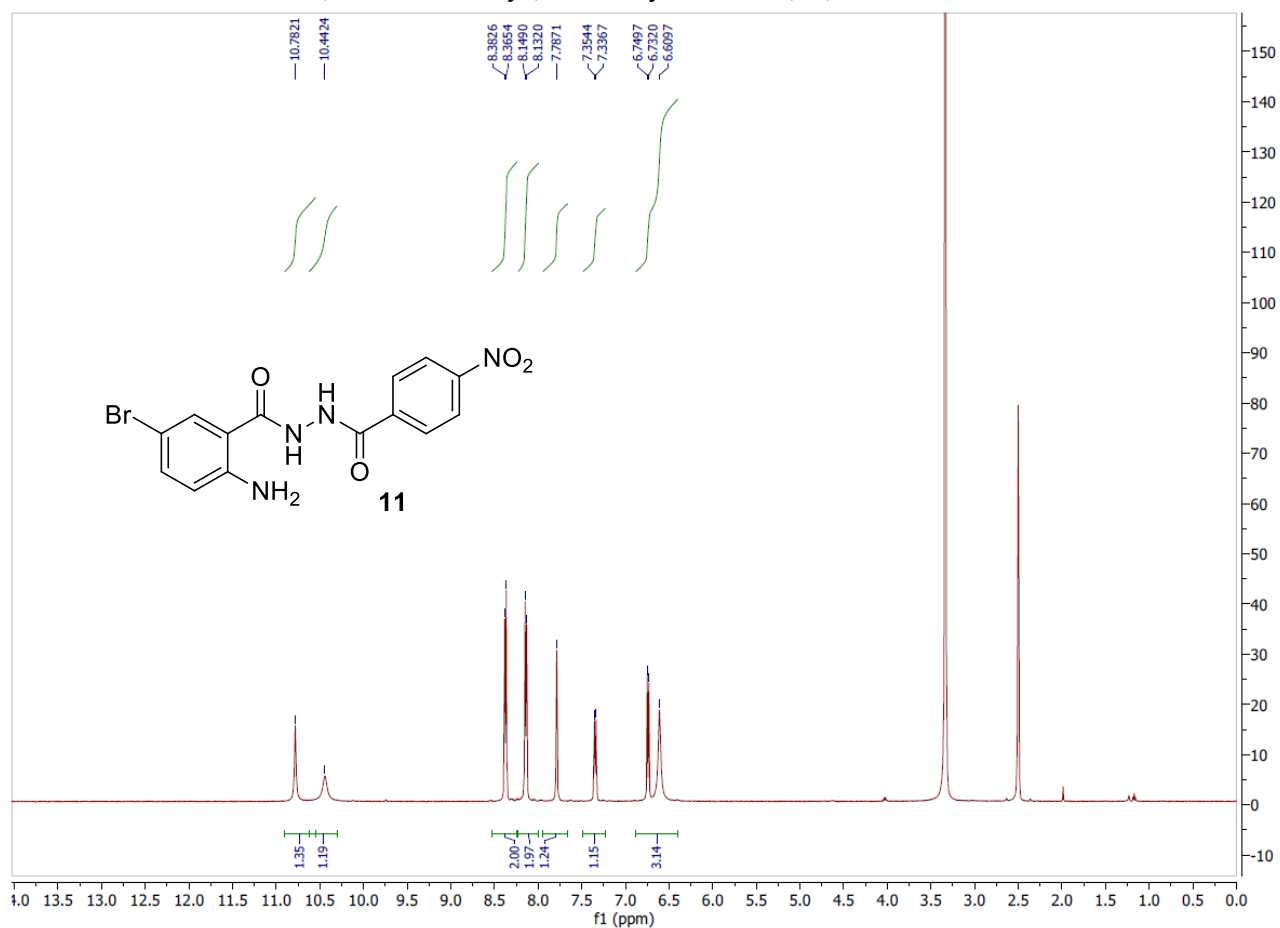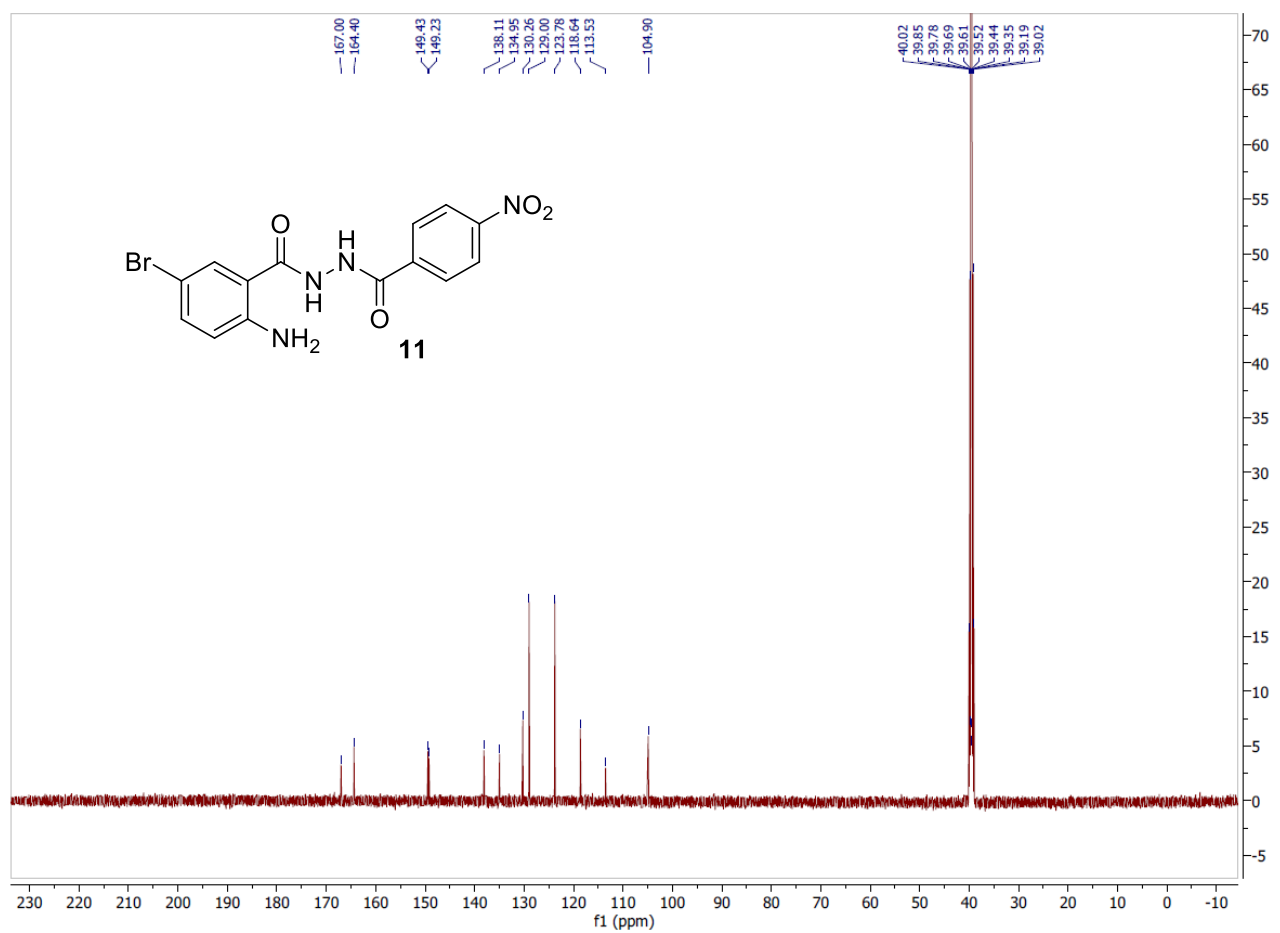

7\_181210123101 #3-11 RT: 0.04-0.15 AV: 9 NL: 1.15E5  
T: FTMS + p ESI Full ms [150.00-500.00]

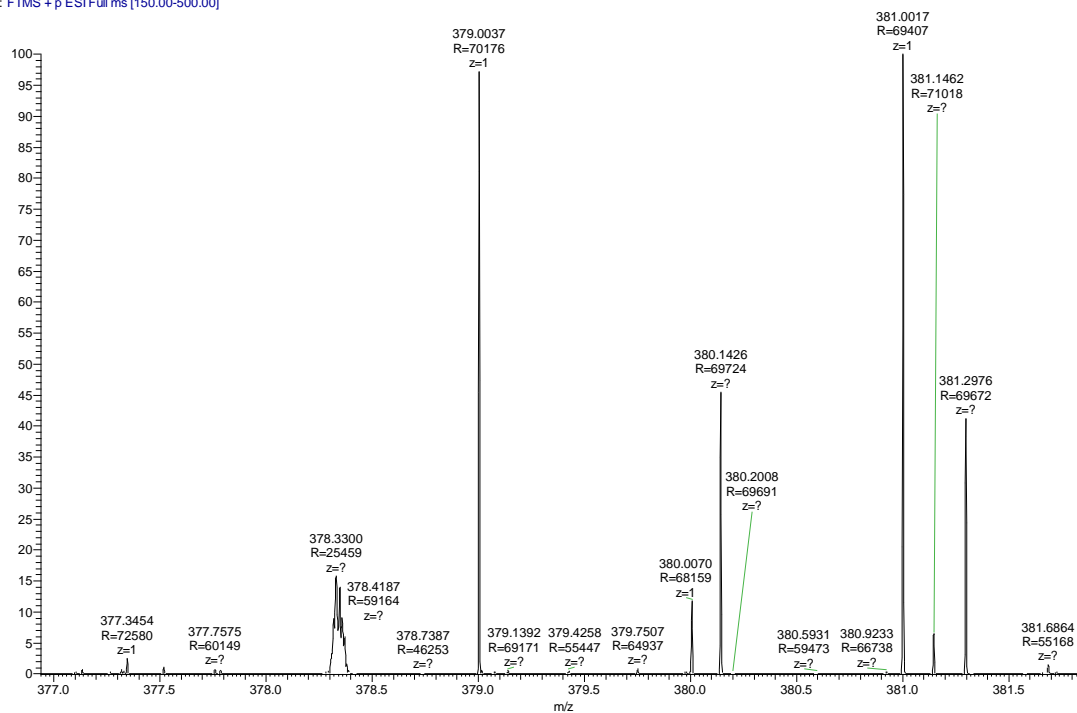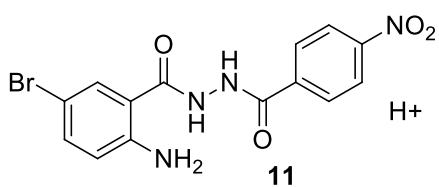

Chemical Formula:  $C_{14}H_{12}BrN_4O_4^+$

Exact Mass: 379,0036

Molecular Weight: 380,1729



*N'*-(2-amino-5-bromobenzoyl)furan-2-carbohydrazide (**12**)

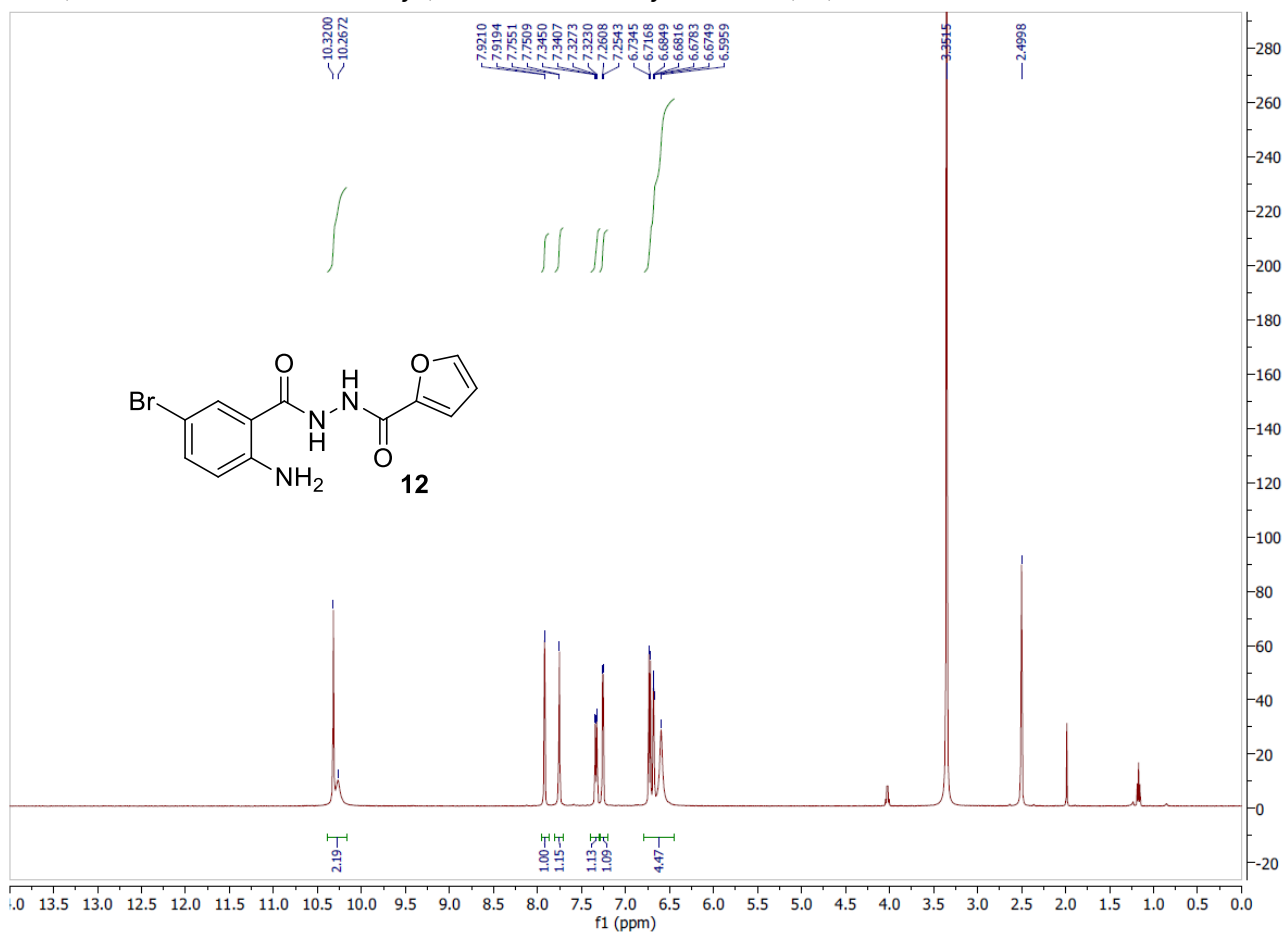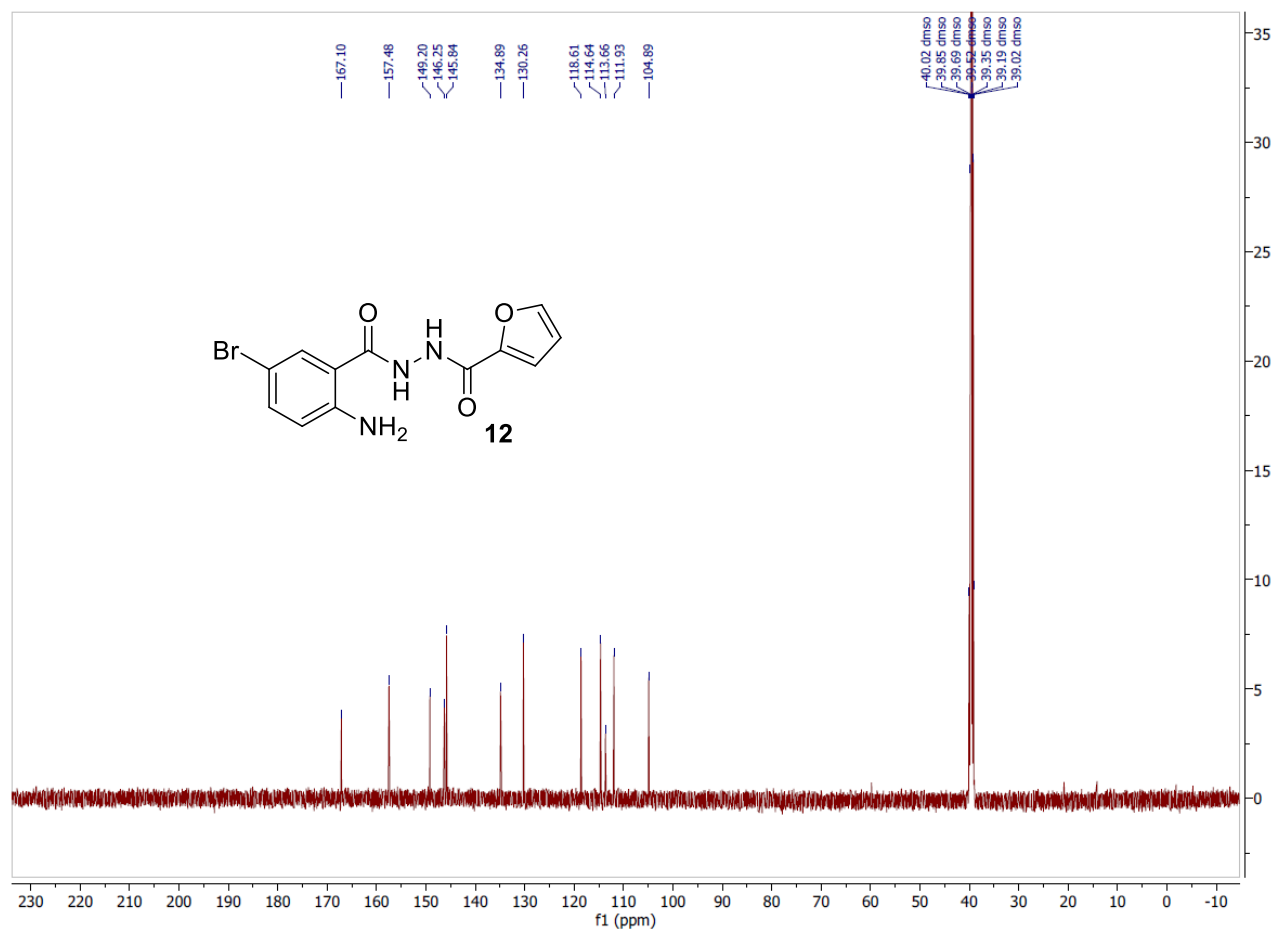

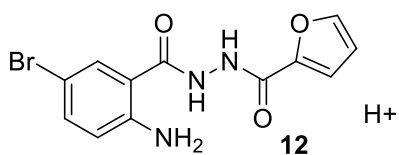

Chemical Formula:  $\text{C}_{12}\text{H}_{11}\text{BrN}_3\text{O}_3^+$

Exact Mass: 323,9978

Molecular Weight: 325,1375

7\_181210123101 #498 RT: 7.23 AV: 1 NL: 8.91E5  
T: FTMS + p ESIFullms [150.00-500.00]

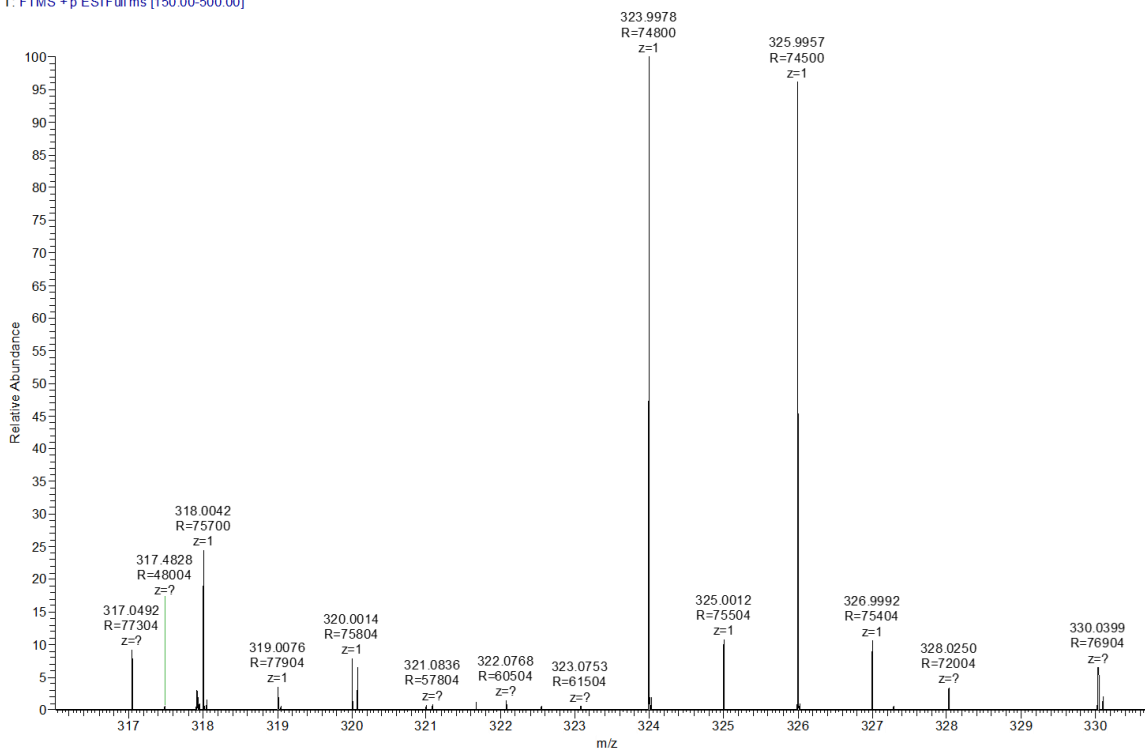

2-amino-*N'*-benzoyl-3,5-dibromobenzohydrazide (**13**)

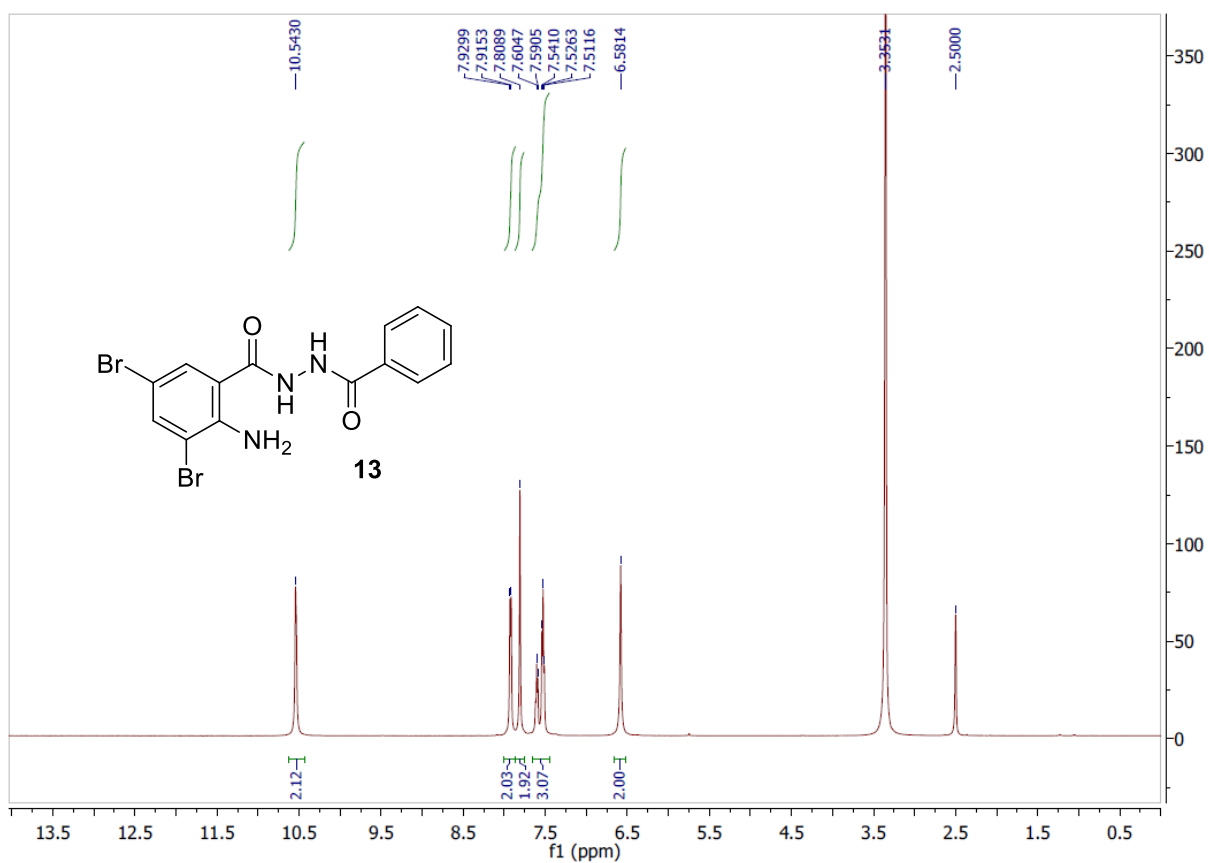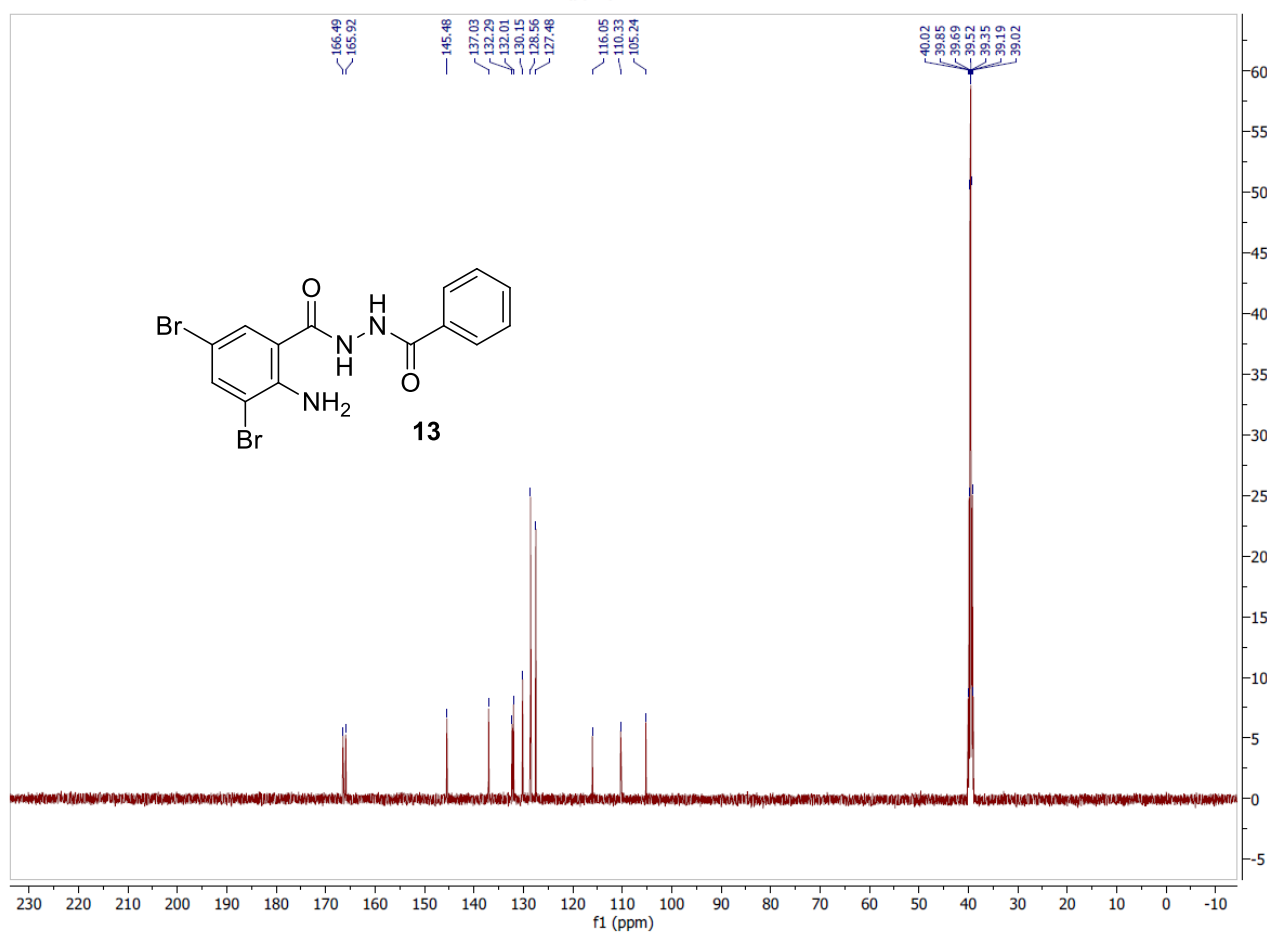

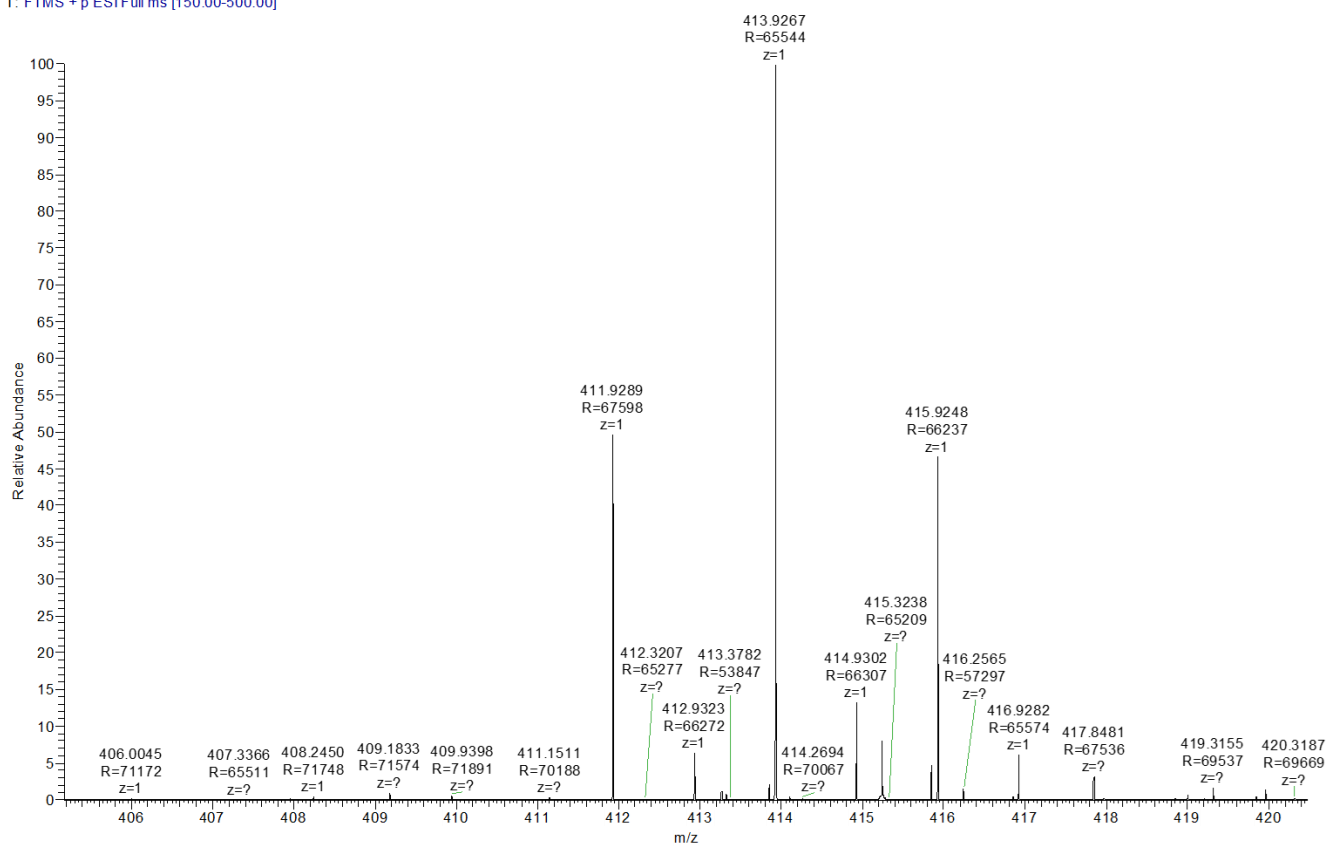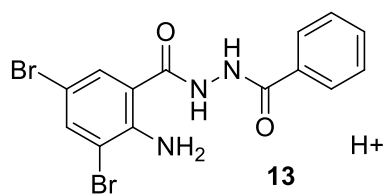

Chemical Formula: C<sub>14</sub>H<sub>12</sub>Br<sub>2</sub>N<sub>3</sub>O<sub>2</sub><sup>+</sup>

Exact Mass: 411,9291

Molecular Weight: 414,0714

2-amino-3,5-dibromo-*N*'-(4-chlorobenzoyl)benzohydrazide (**14**)

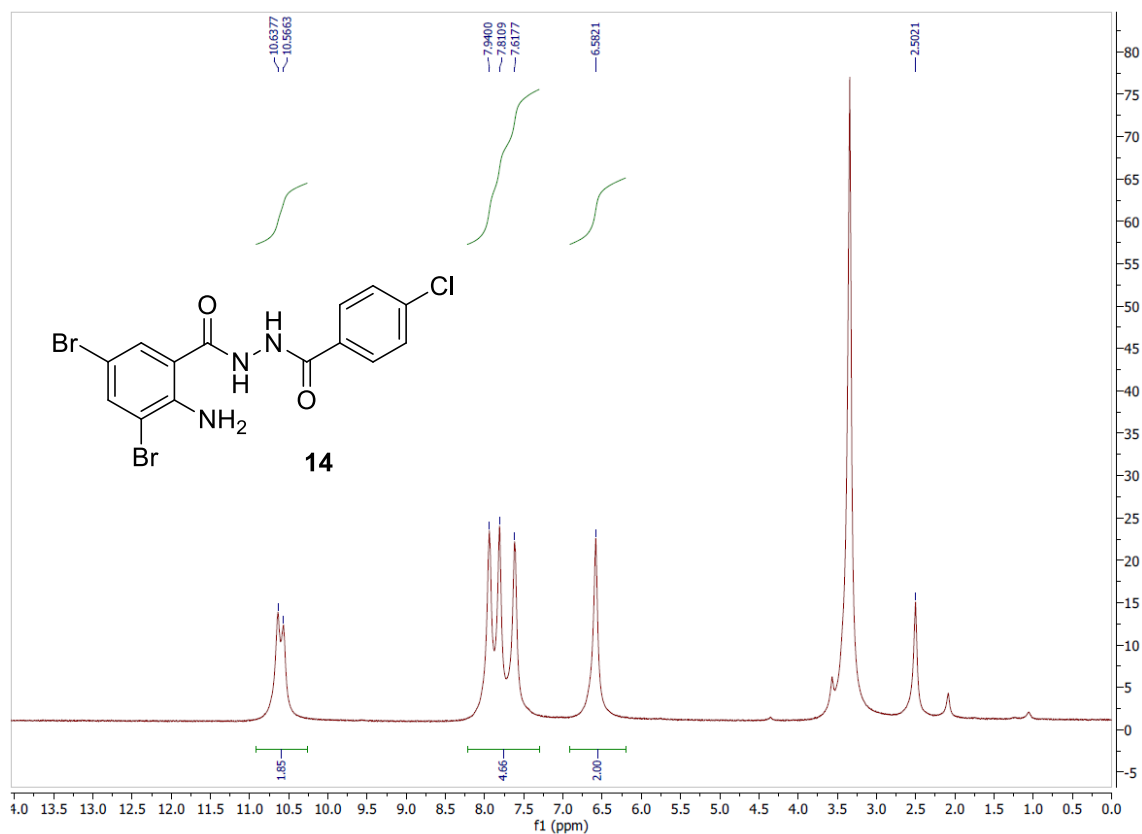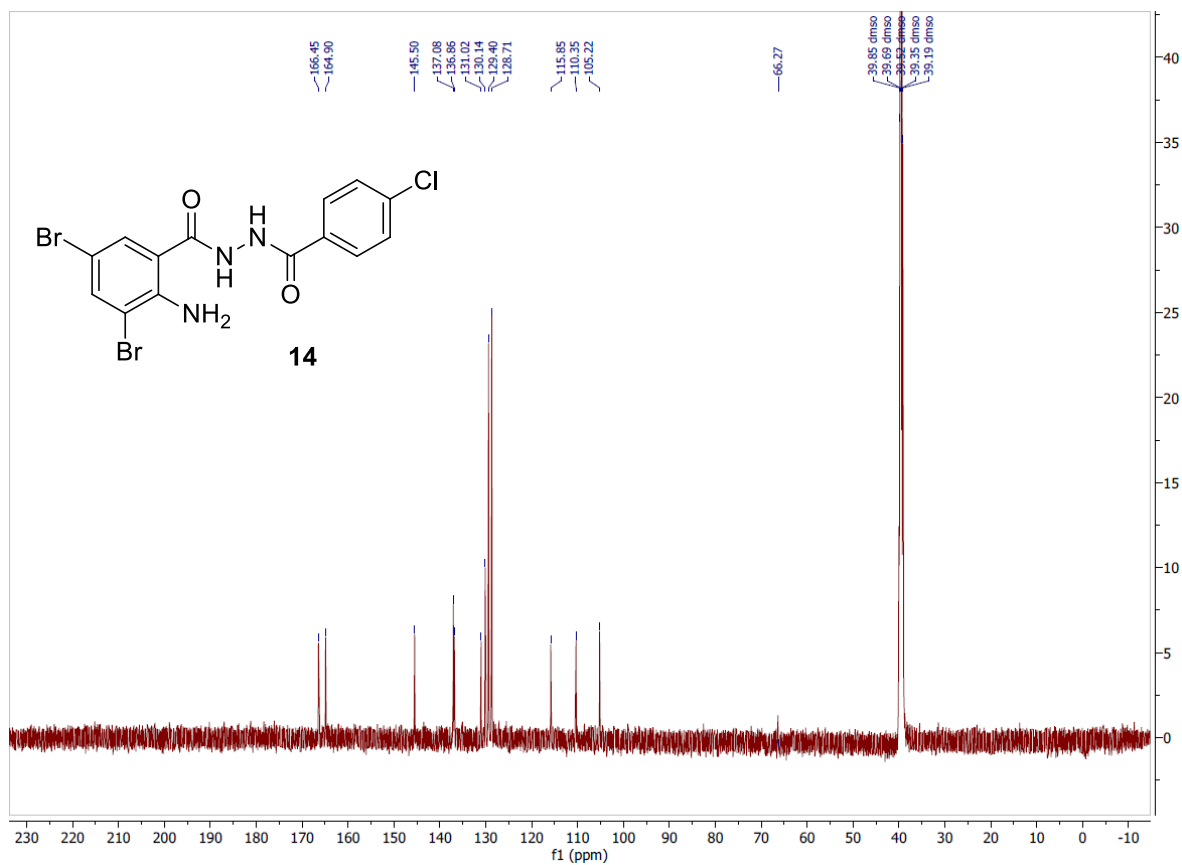

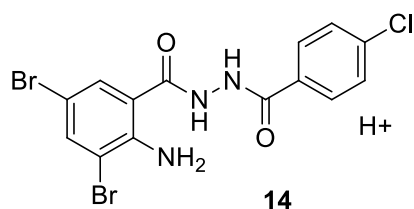

Chemical Formula:  $C_{14}H_{11}Br_2ClN_3O_2^+$

Exact Mass: 445,8901

Molecular Weight: 448,5165

WASH\_181210123101 #468-530 RT: 6.78-7.63 AV: 63 NL: 1.64E6  
T: FTMS + p ESI Full ms [150.00-500.00]

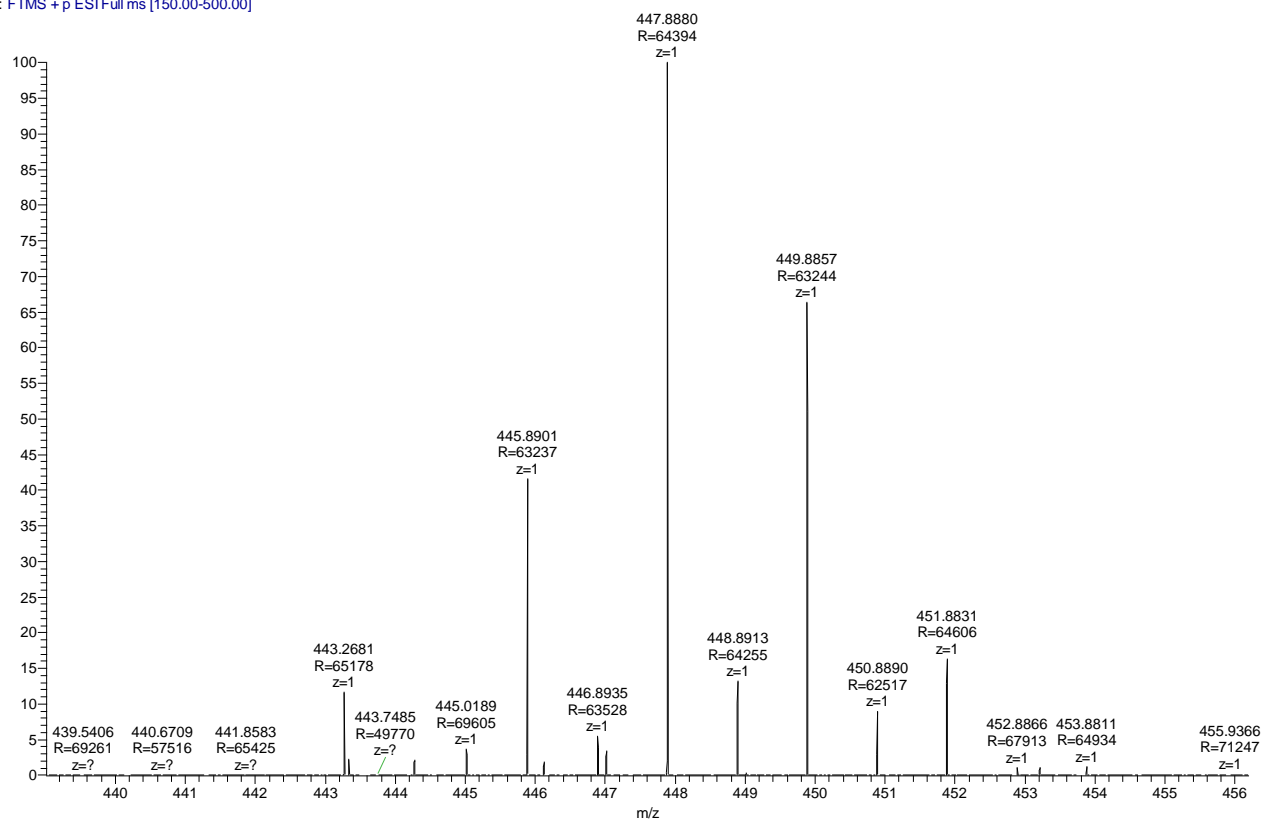

2-amino-3,5-dibromo-*N'*-(4-nitrobenzoyl)benzohydrazide (**15**)

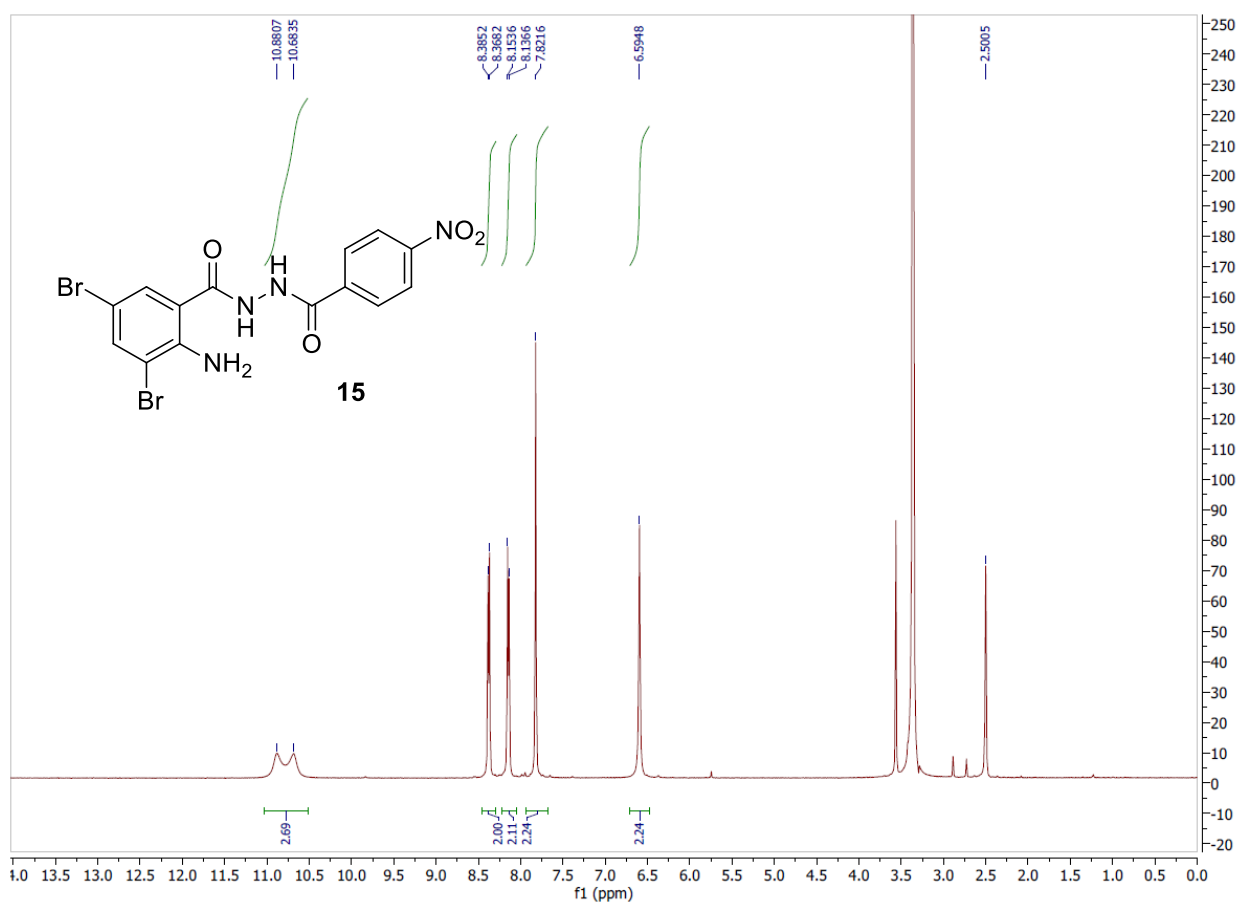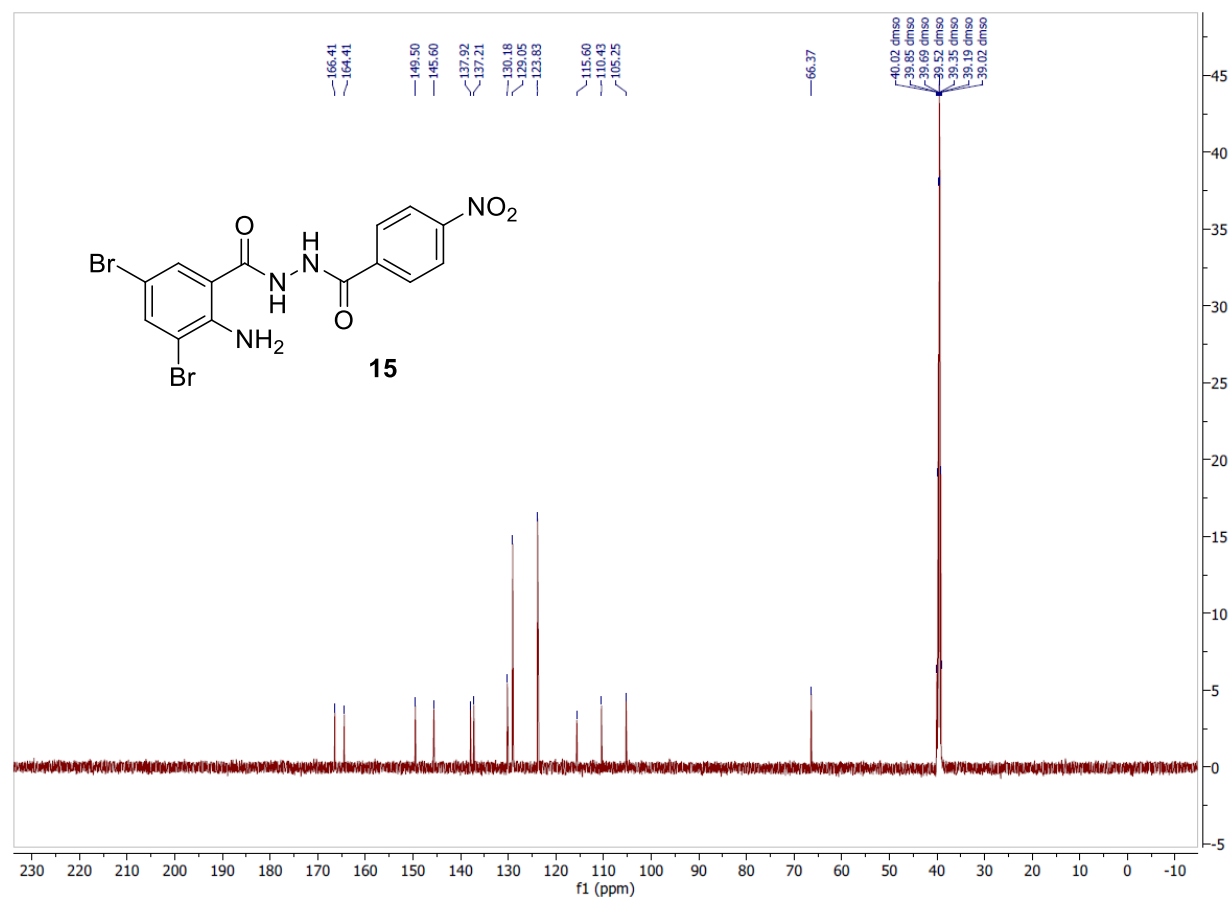

1 #34-48 RT: 1.39-1.97 AV: 15 NL: 1.80E5  
T: FTMS + p ESI Full ms [100.00-600.00]

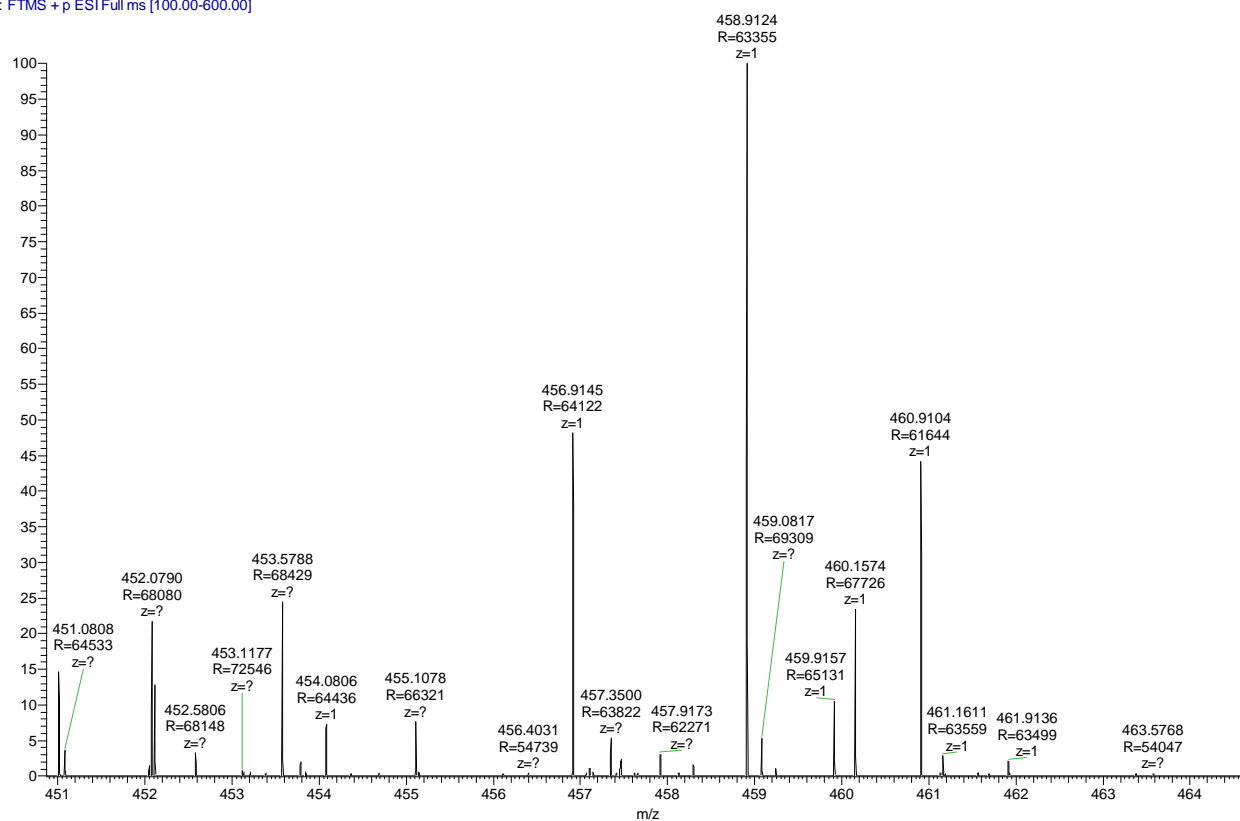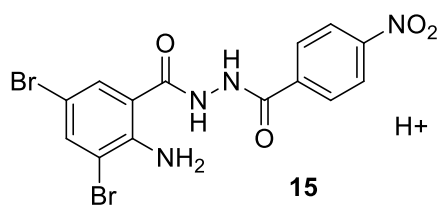

Chemical Formula:  $C_{14}H_{11}Br_2N_4O_4^+$

Exact Mass: 456,9142

Molecular Weight: 459,0690



*N'*-(2-amino-3,5-dibromobenzoyl)furan-2-carbohydrazide (**16**)

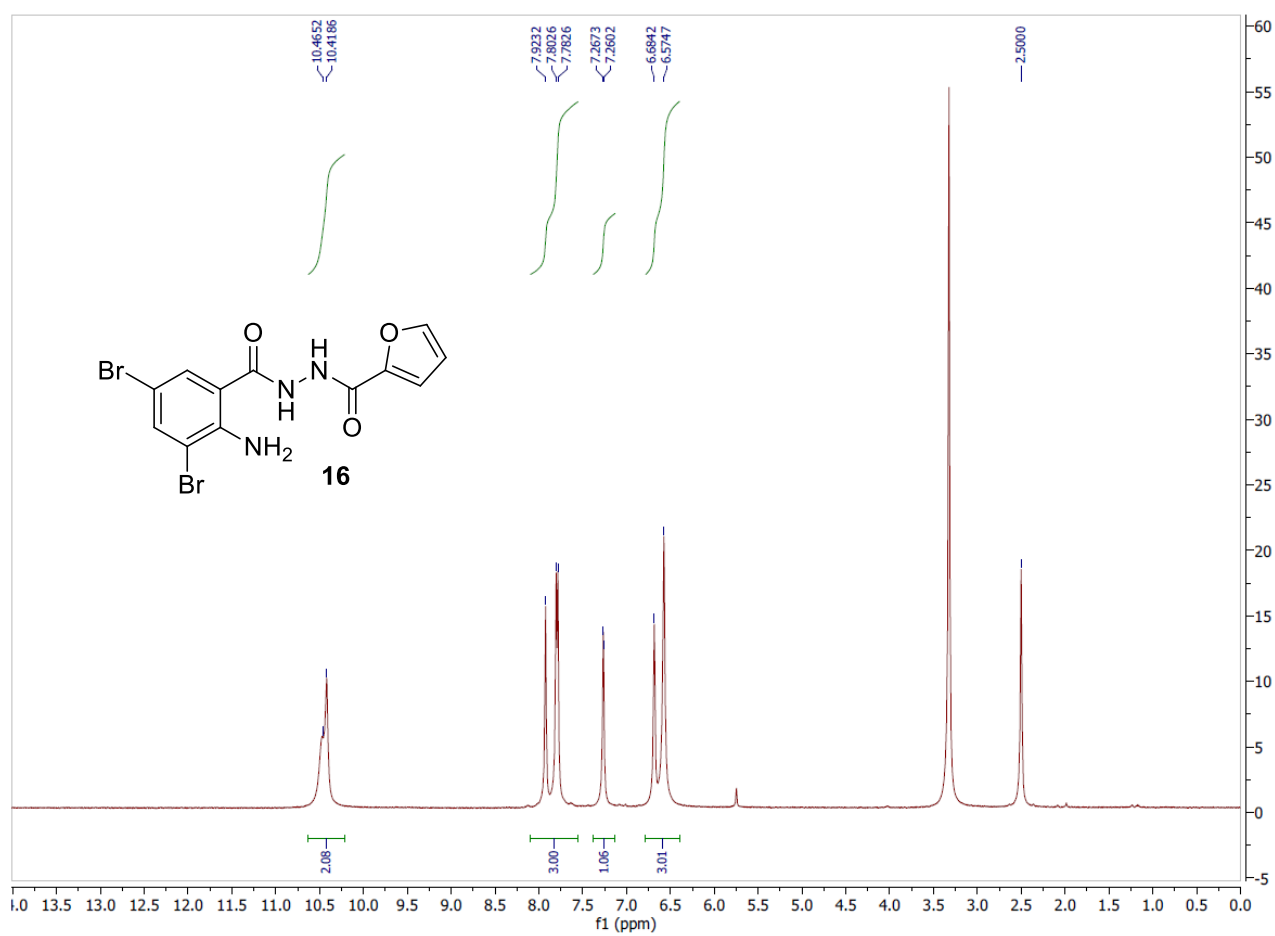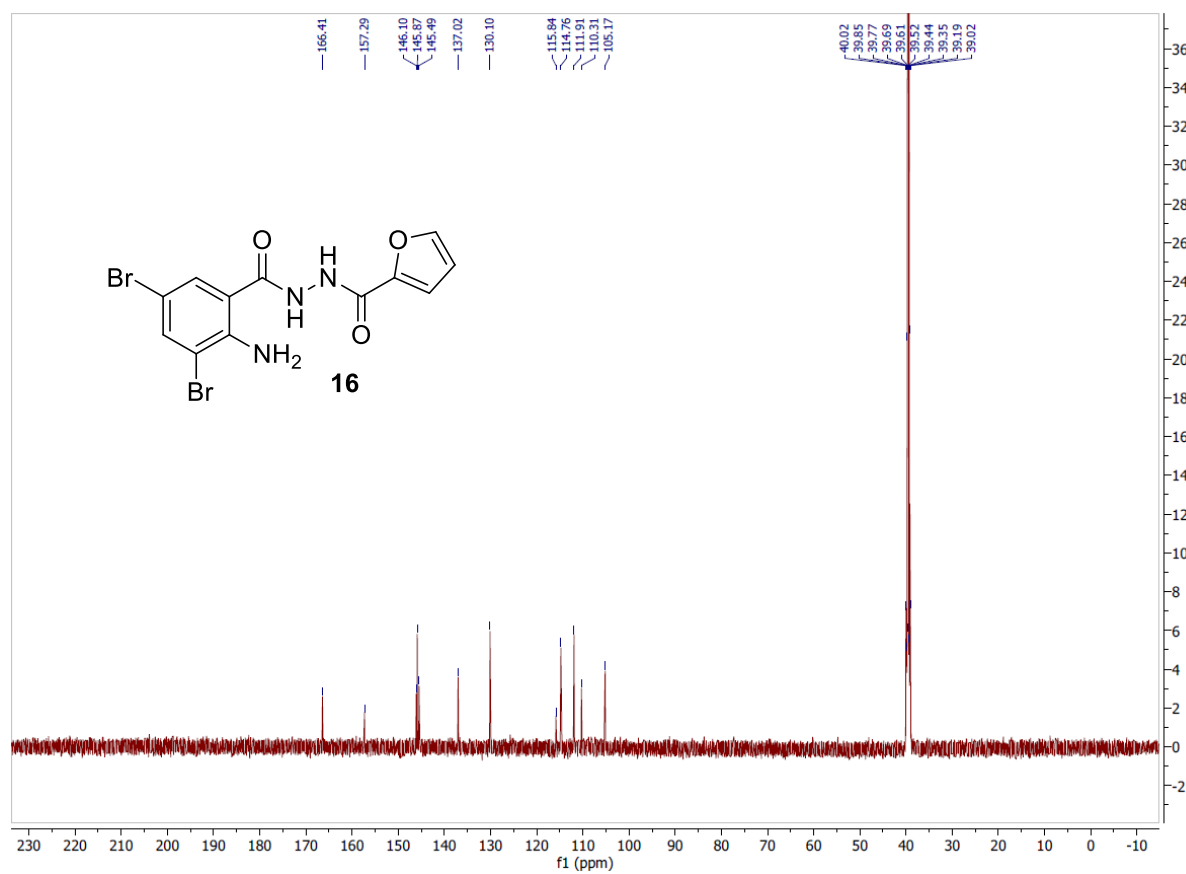

8\_2#137-143 RT: 1.96-2.04 AV: 7 NL: 3.08E6  
T: FTMS + p ESI Full ms [100.00-600.00]

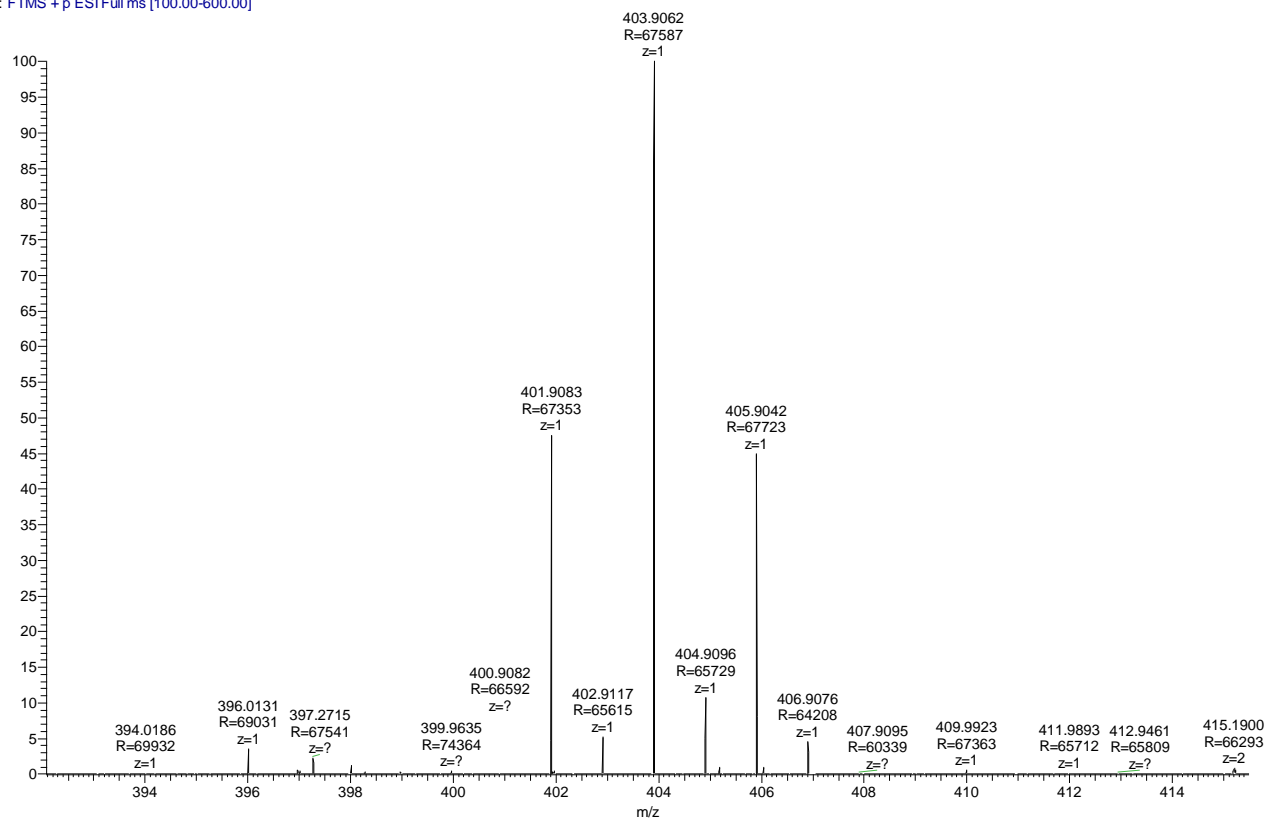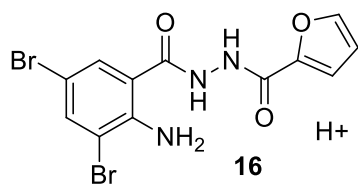

Chemical Formula:  $C_{12}H_{10}Br_2N_3O_3^+$

Exact Mass: 401,9083

Molecular Weight: 404,0336

2-amino-*N'*-benzoyl-5-iodobenzohydrazide (**17**)

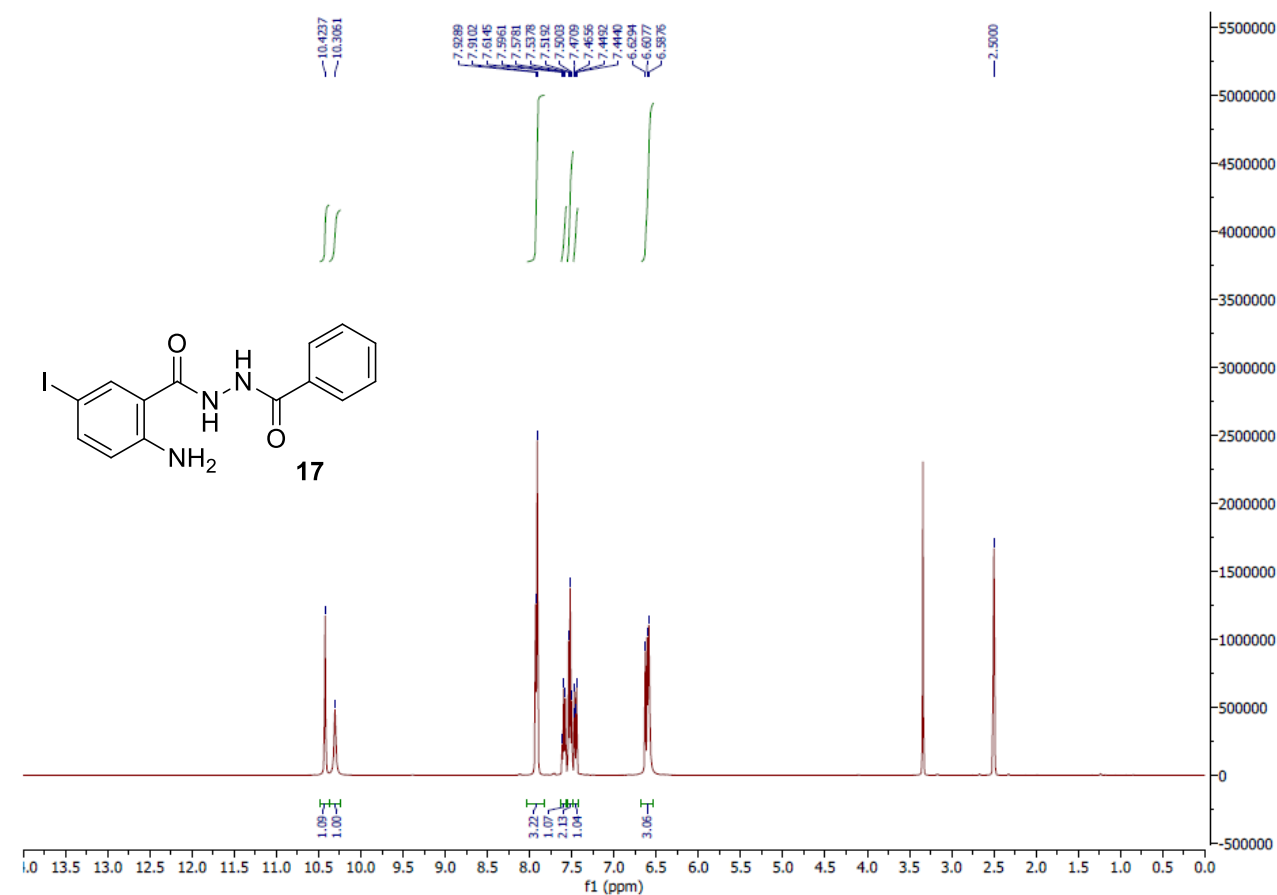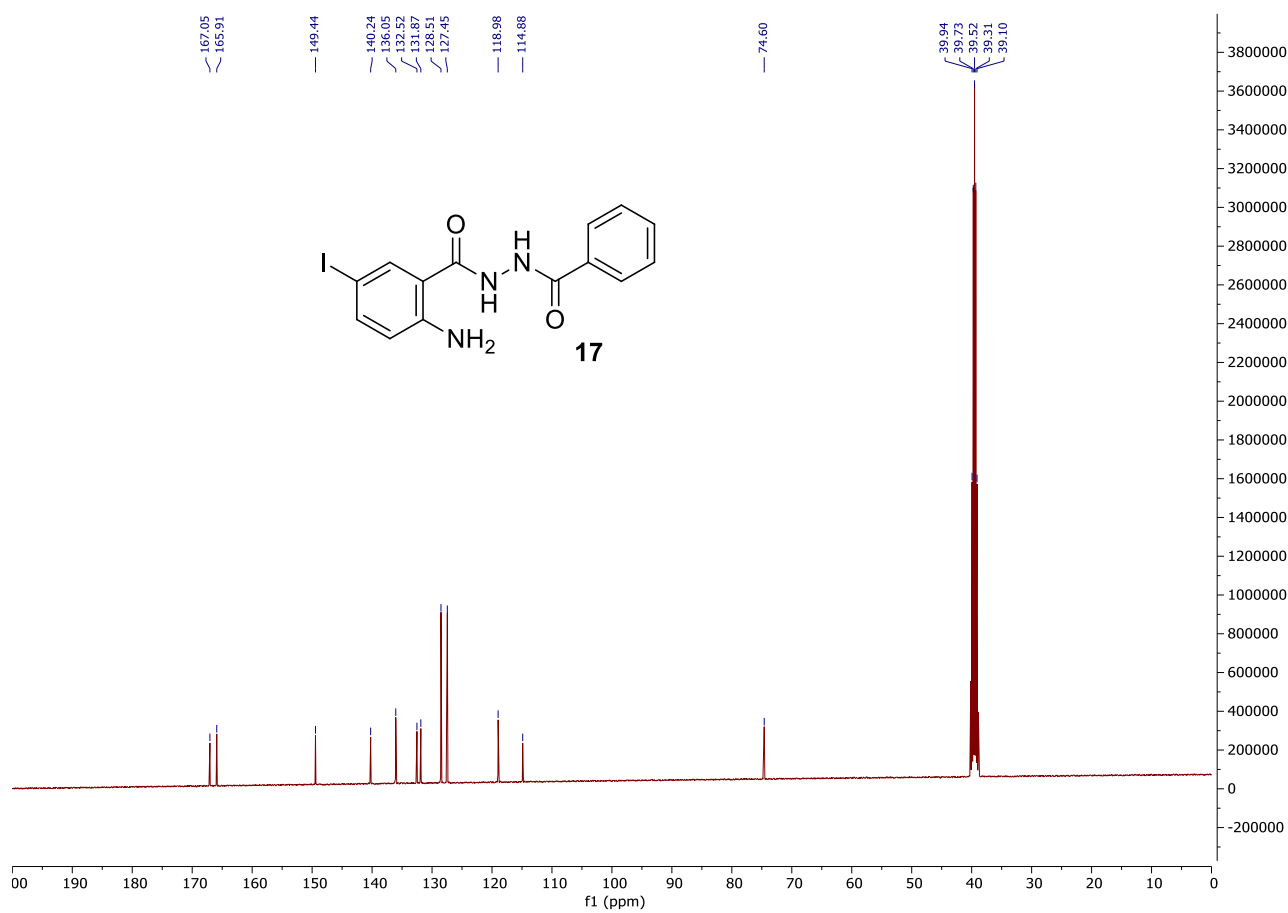

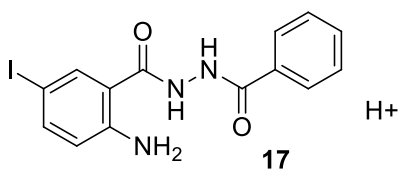

Chemical Formula:  $C_{14}H_{13}IN_3O_2^+$

Exact Mass: 382,0047

Molecular Weight: 382,1758

5 #145 RT: 3.59 AV: 1 NL: 8.61E6  
T: FTMS + p ESI Full ms [150.00-500.00]

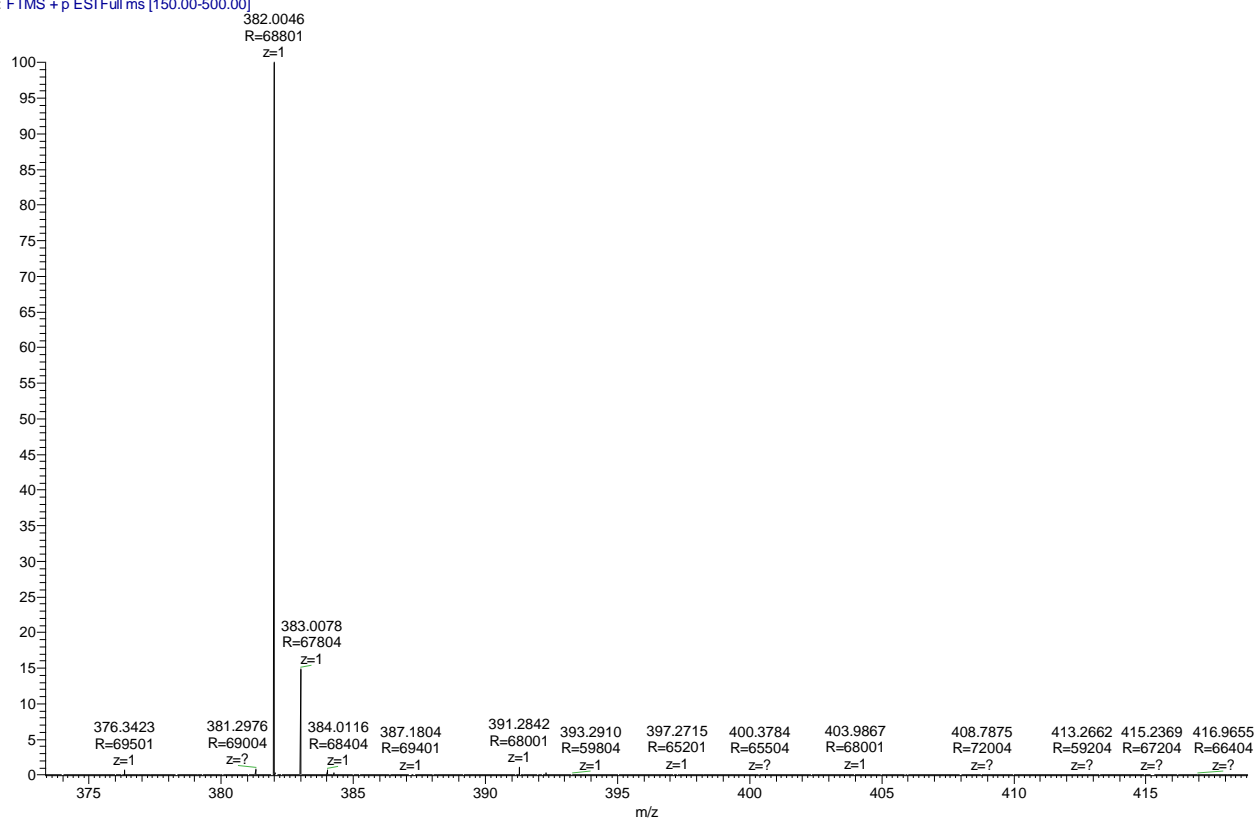

*N'*-(2-amino-5-iodobenzoyl)furan-2-carbohydrazide (**18**)

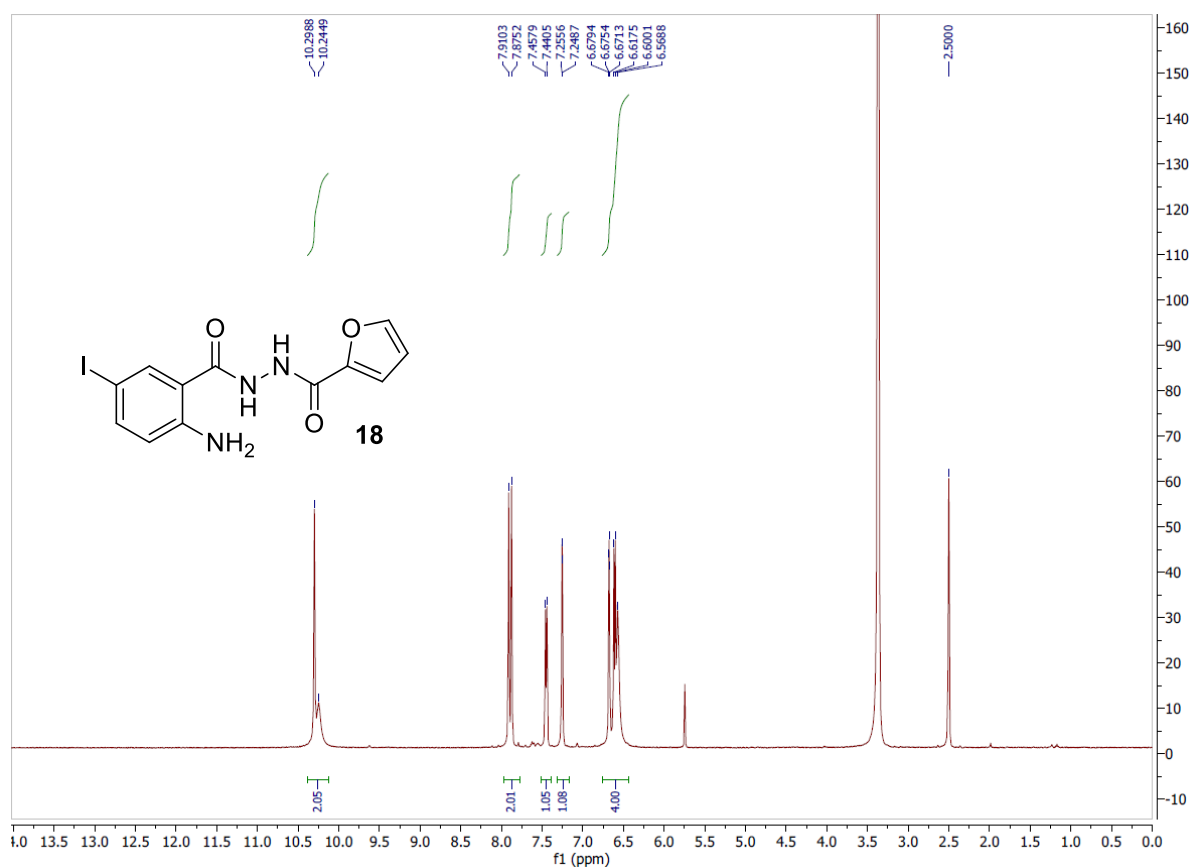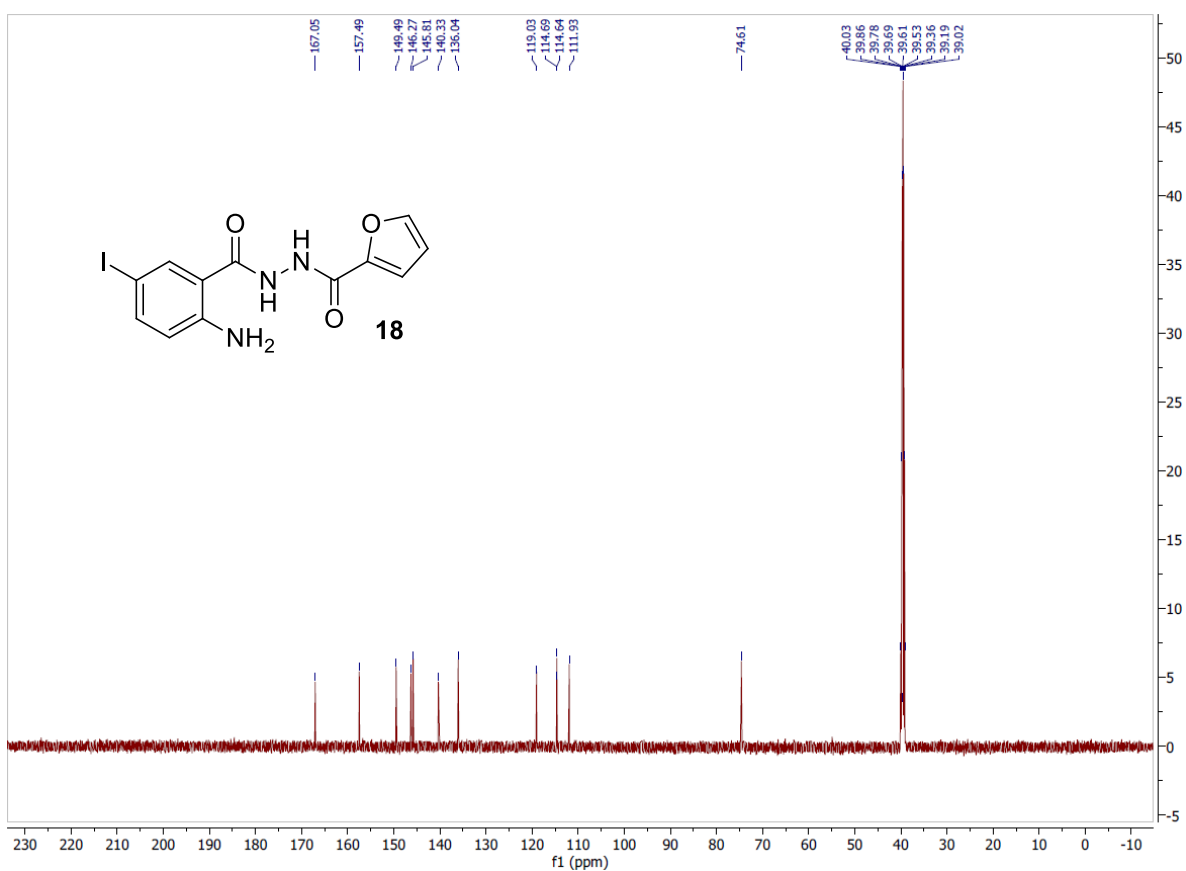

5\_181210123101 #492-501 RT: 8.51-8.64 AV: 10 NL: 1.26E6  
T: FTMS + p ESI Full ms [150.00-500.00]

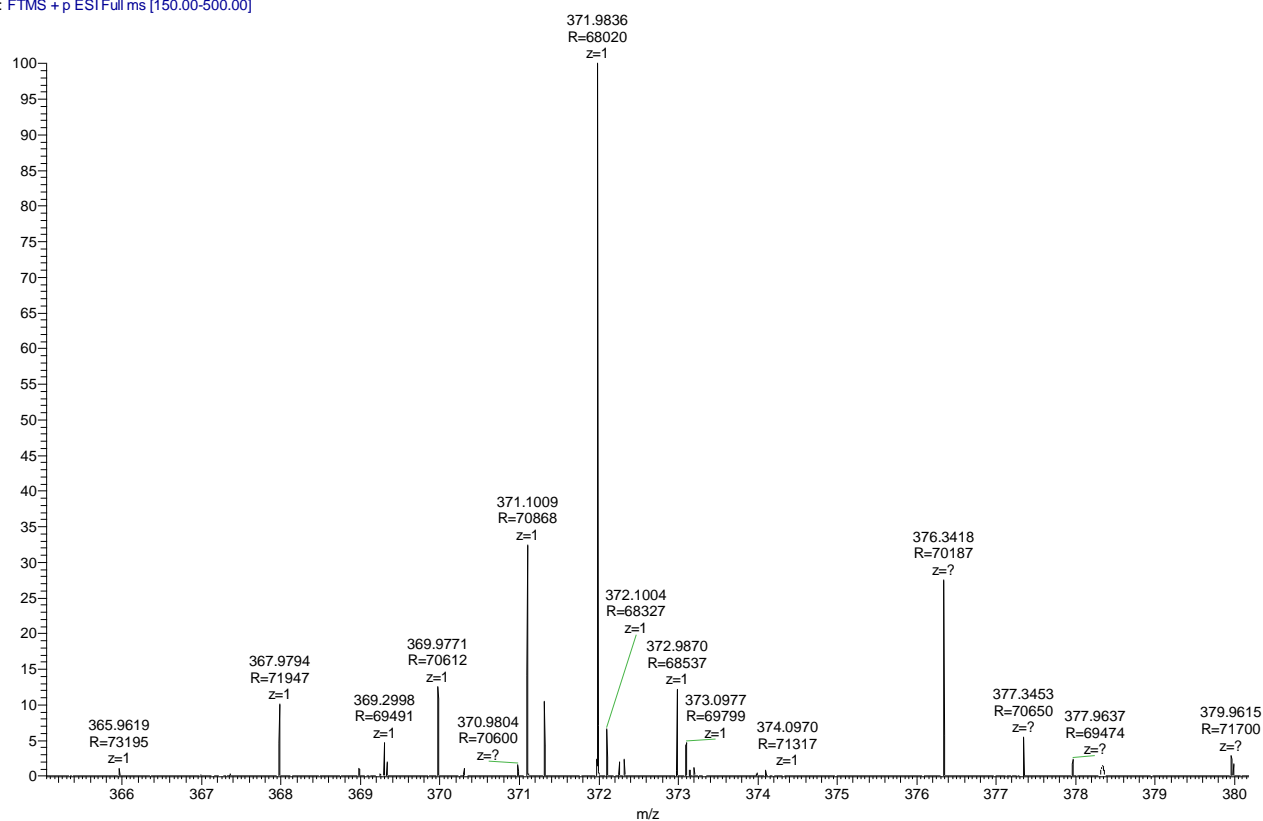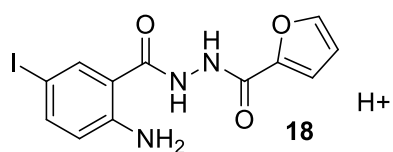

Chemical Formula: C<sub>12</sub>H<sub>11</sub>IN<sub>3</sub>O<sub>3</sub><sup>+</sup>

Exact Mass: 371,9840

Molecular Weight: 372,1380

2-amino-*N'*-benzoyl-4-chlorobenzohydrazide (**19**)

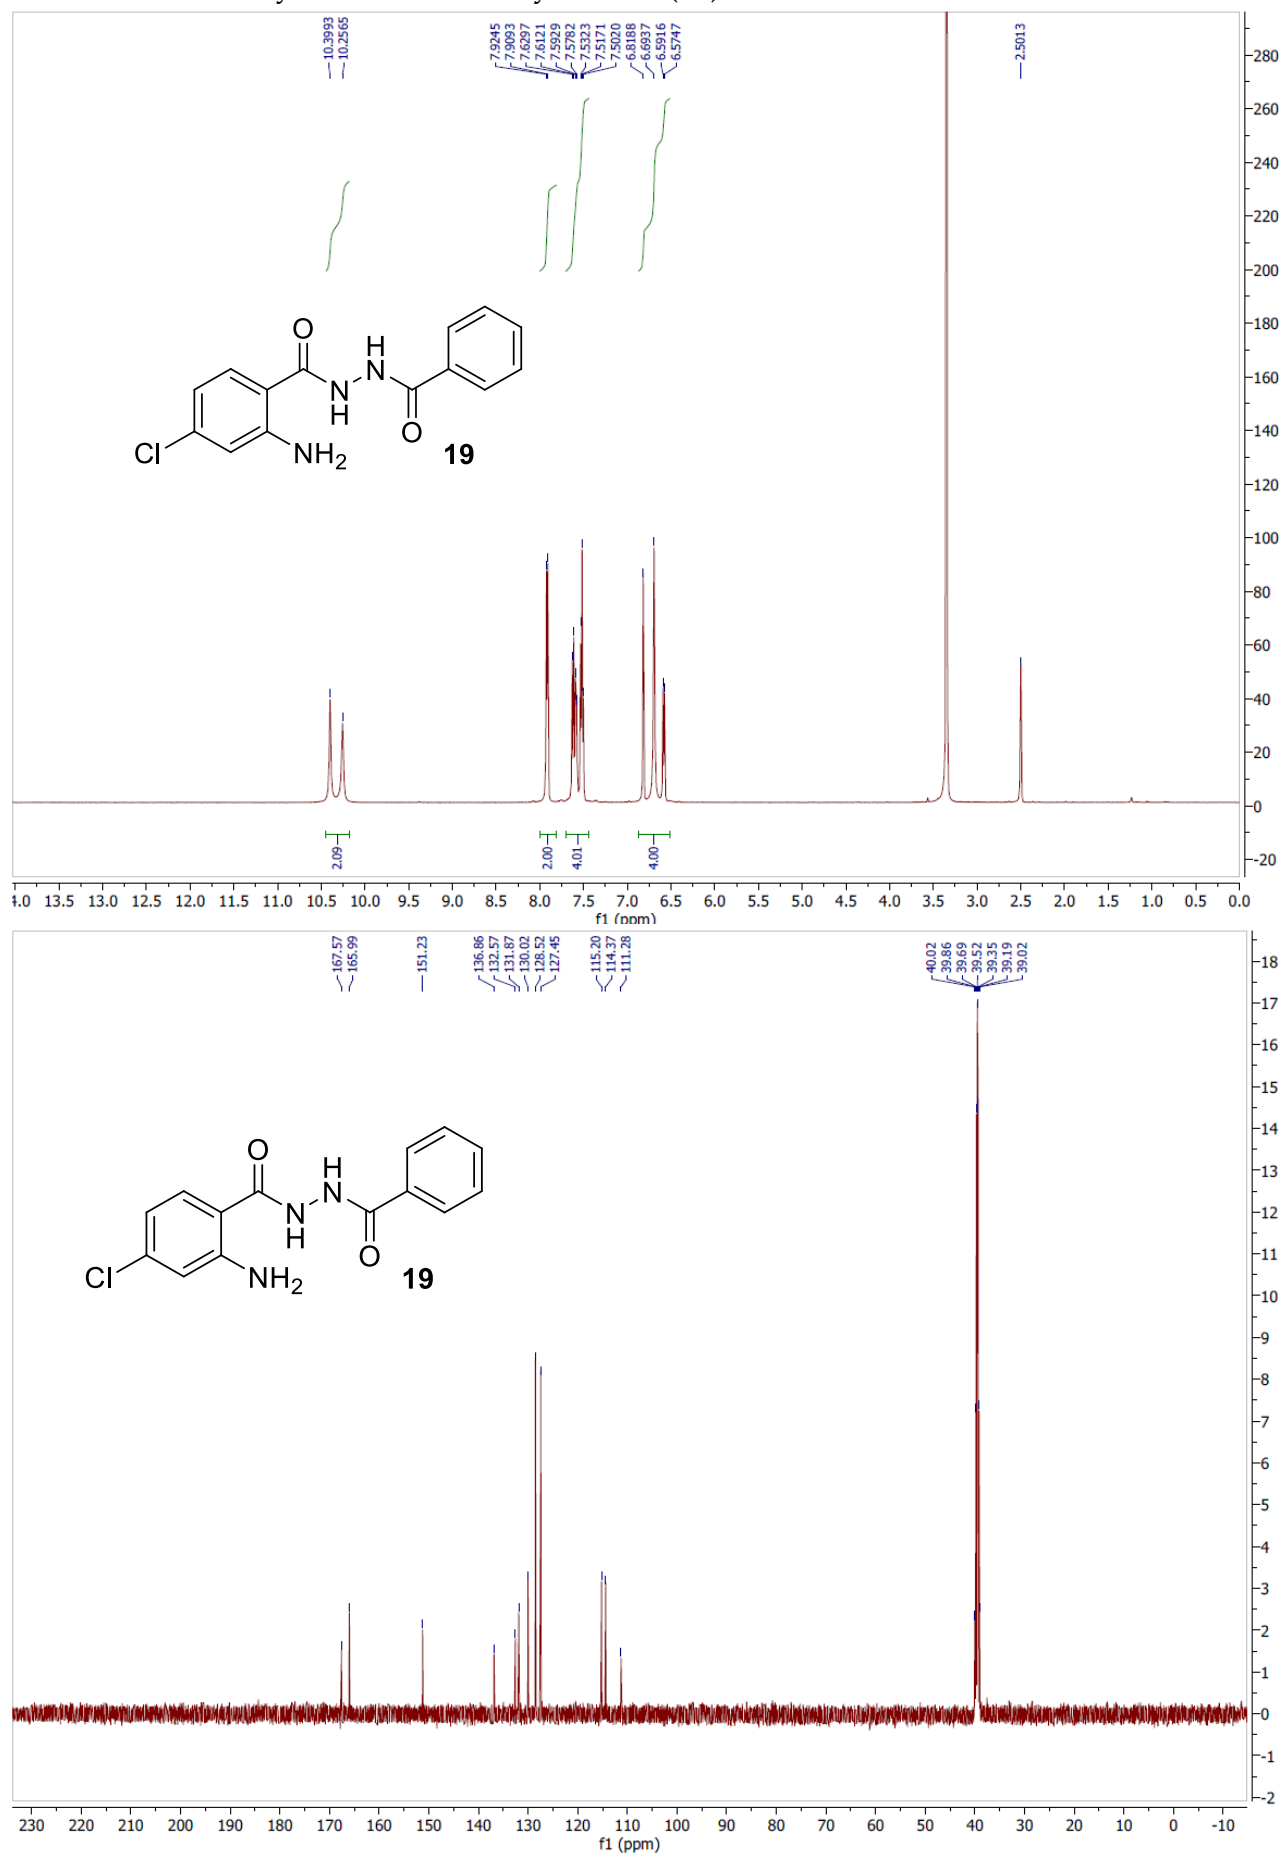

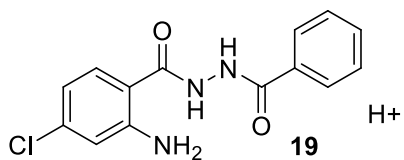

Chemical Formula:  $C_{14}H_{13}ClN_3O_2^+$   
 Exact Mass: 290,0691

5\_181210123101 #419-428 RT: 7.47-7.60 AV: 10 NL: 2.05E6  
 T: FTMS + p ESI Full ms [150.00-500.00]

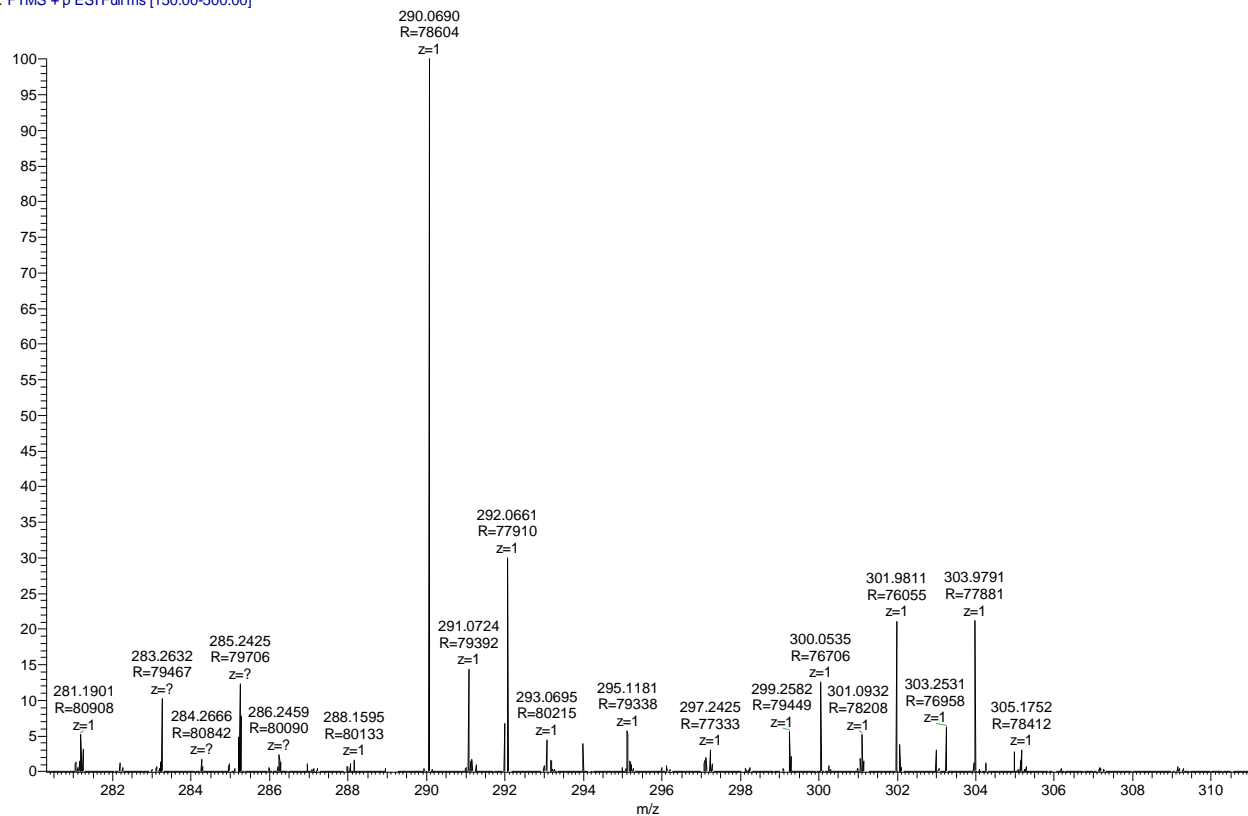



*N'*-(2-amino-4-chlorobenzoyl)furan-2-carbohydrazide (**20**)

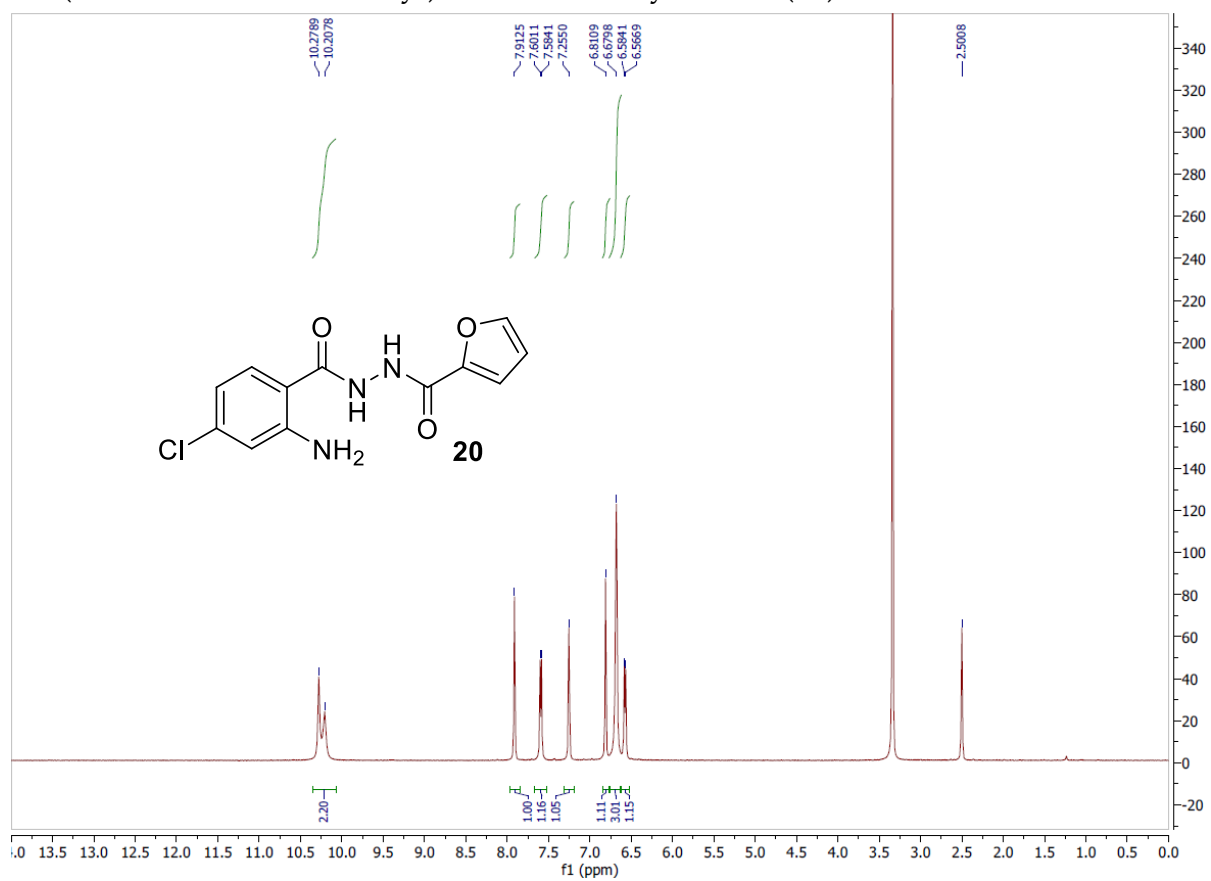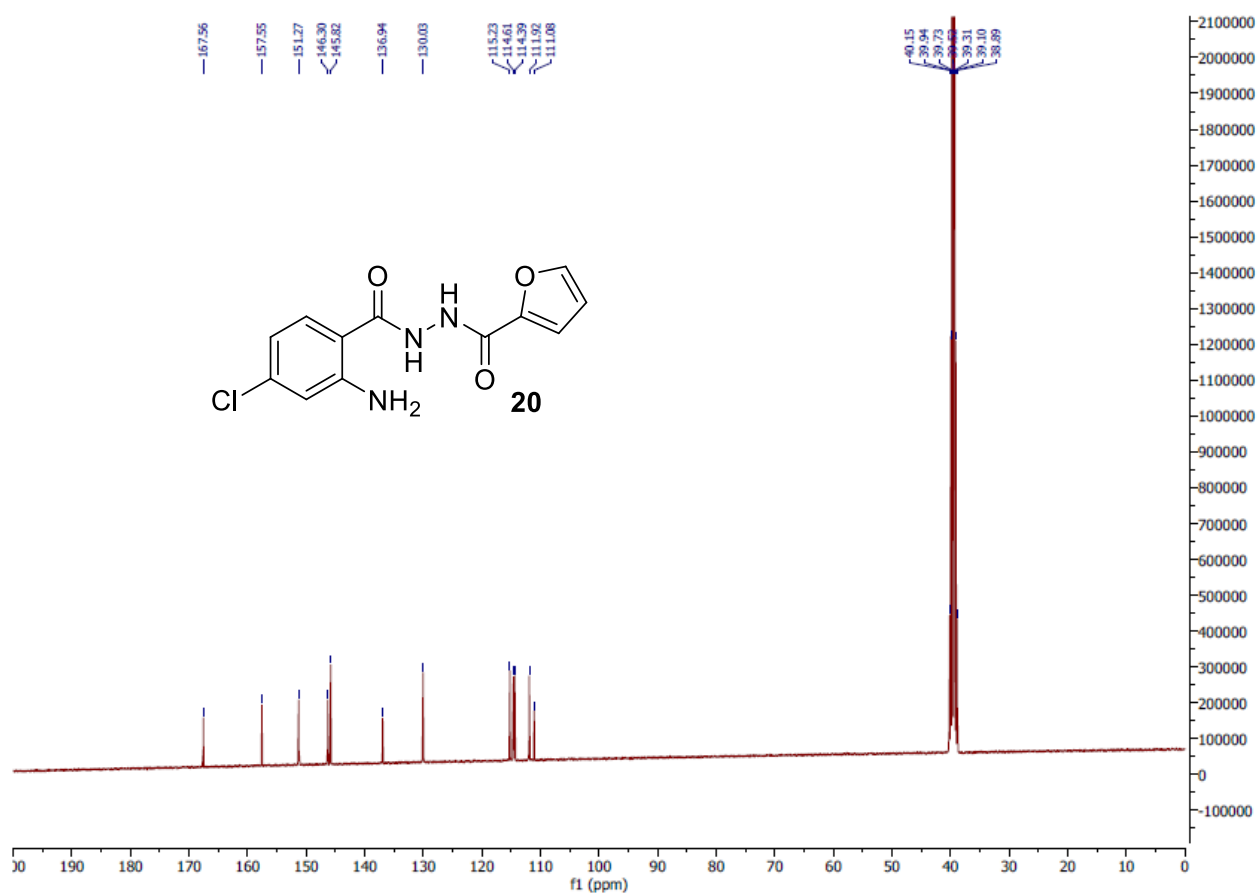

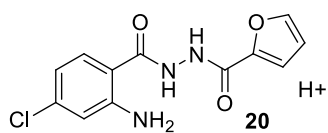

Chemical Formula:  $C_{12}H_{11}ClN_3O_3^+$   
Exact Mass: 280,0483

WASH\_181210123101 #616 RT: 8.82 AV: 1 NL: 5.50E7  
T: FTMS + p ESI Full ms [150.00-500.00]

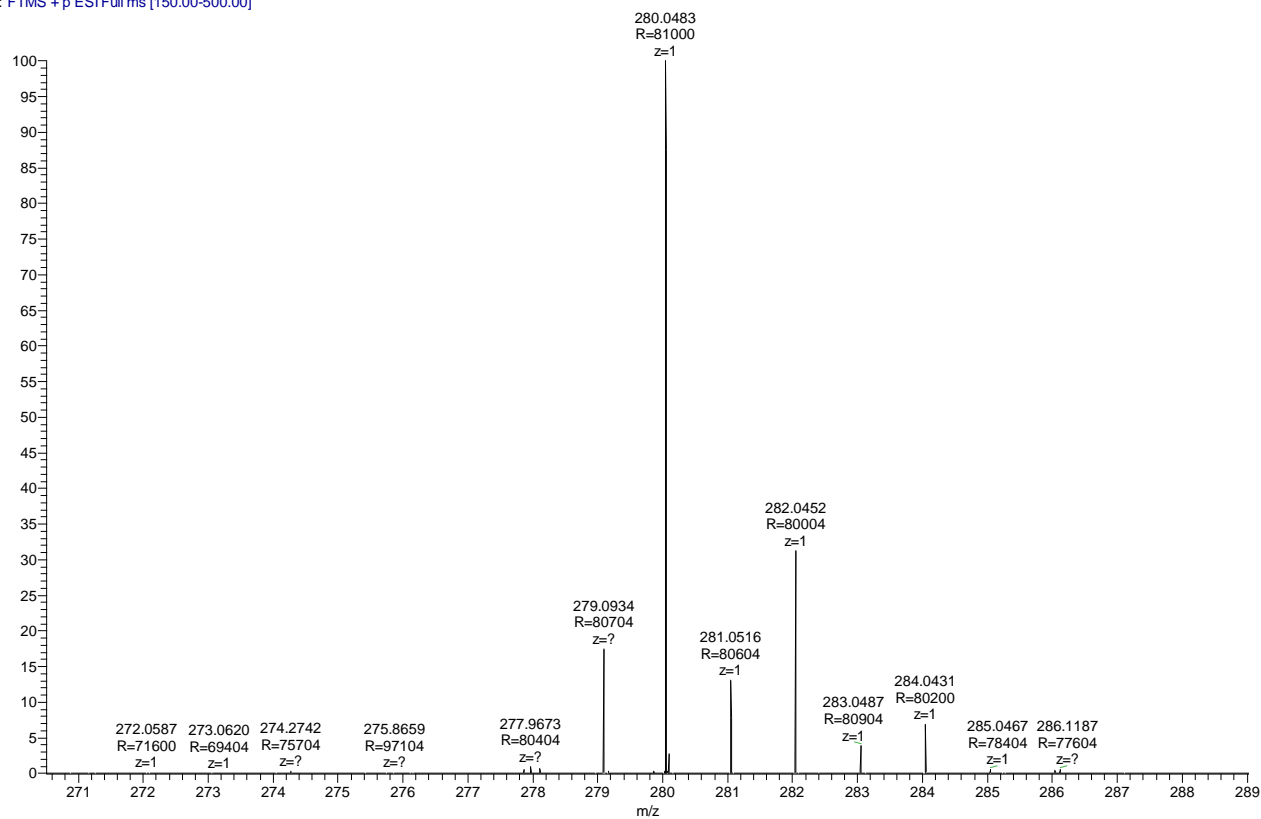

2-amino-*N'*-benzoyl-4-nitrobenzohydrazide (**21**)

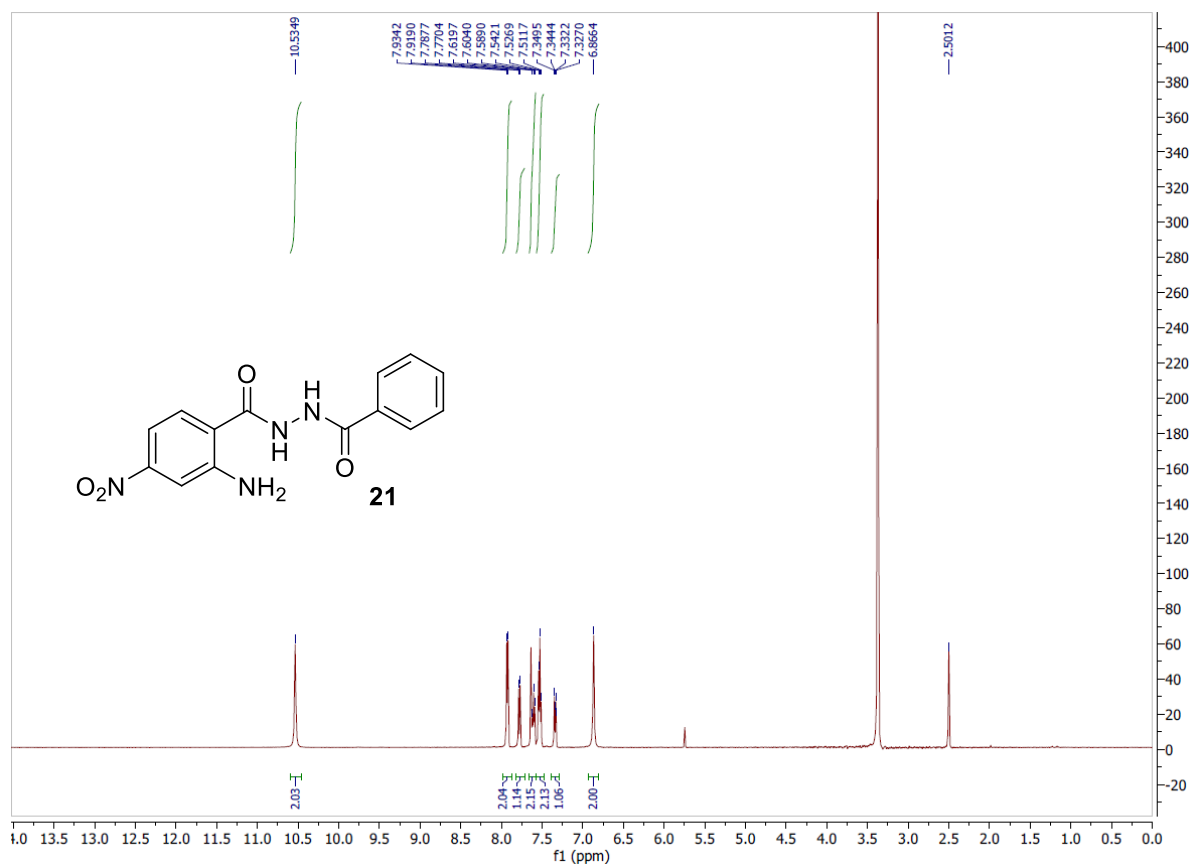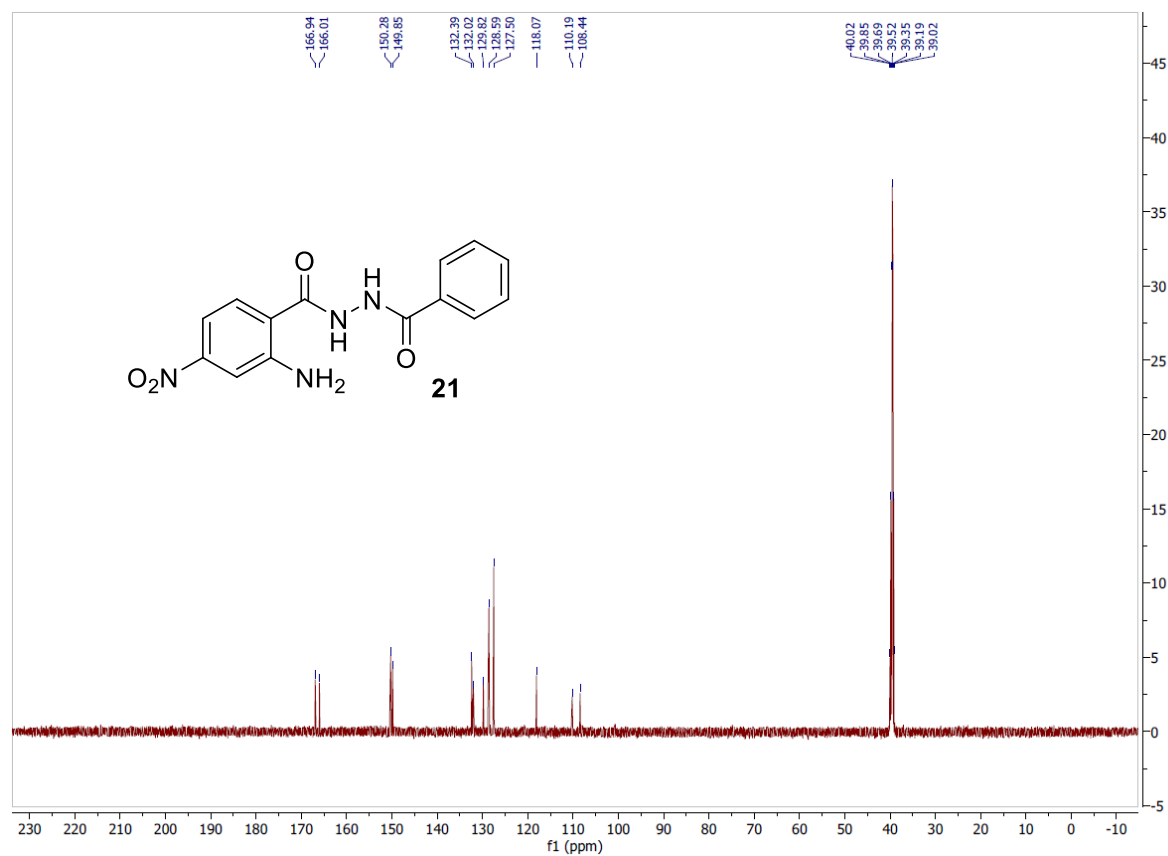

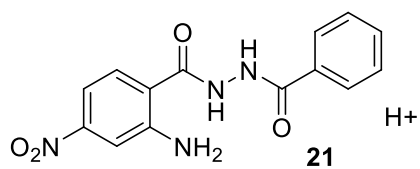

Chemical Formula:  $\text{C}_{14}\text{H}_{13}\text{N}_4\text{O}_4^+$   
Exact Mass: 301,0931

5\_181210123101 #419-428 RT: 7.47-7.60 AV: 10 NL: 4.36E5  
T: FTMS + p ESI Full ms [150.00-500.00]

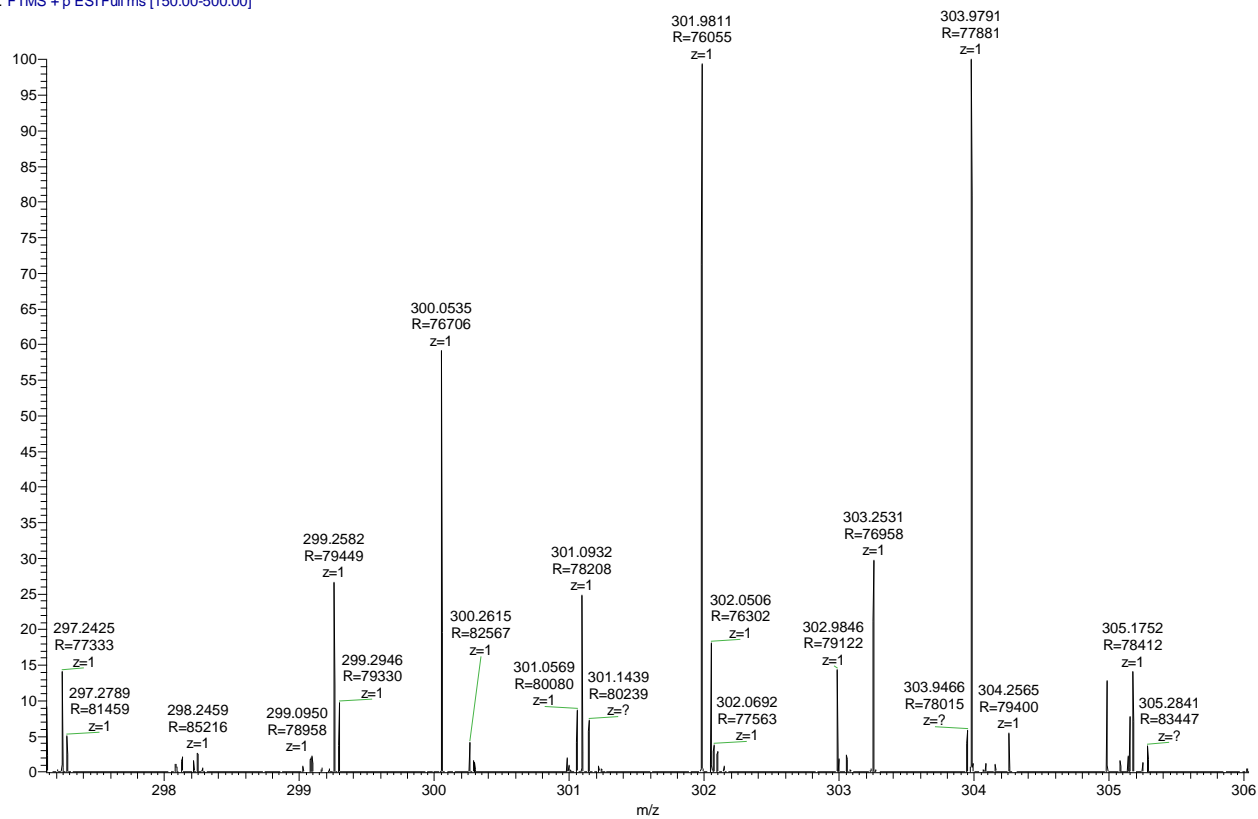

*N'*-(2-amino-4-nitrobenzoyl)furan-2-carbohydrazide (**22**)

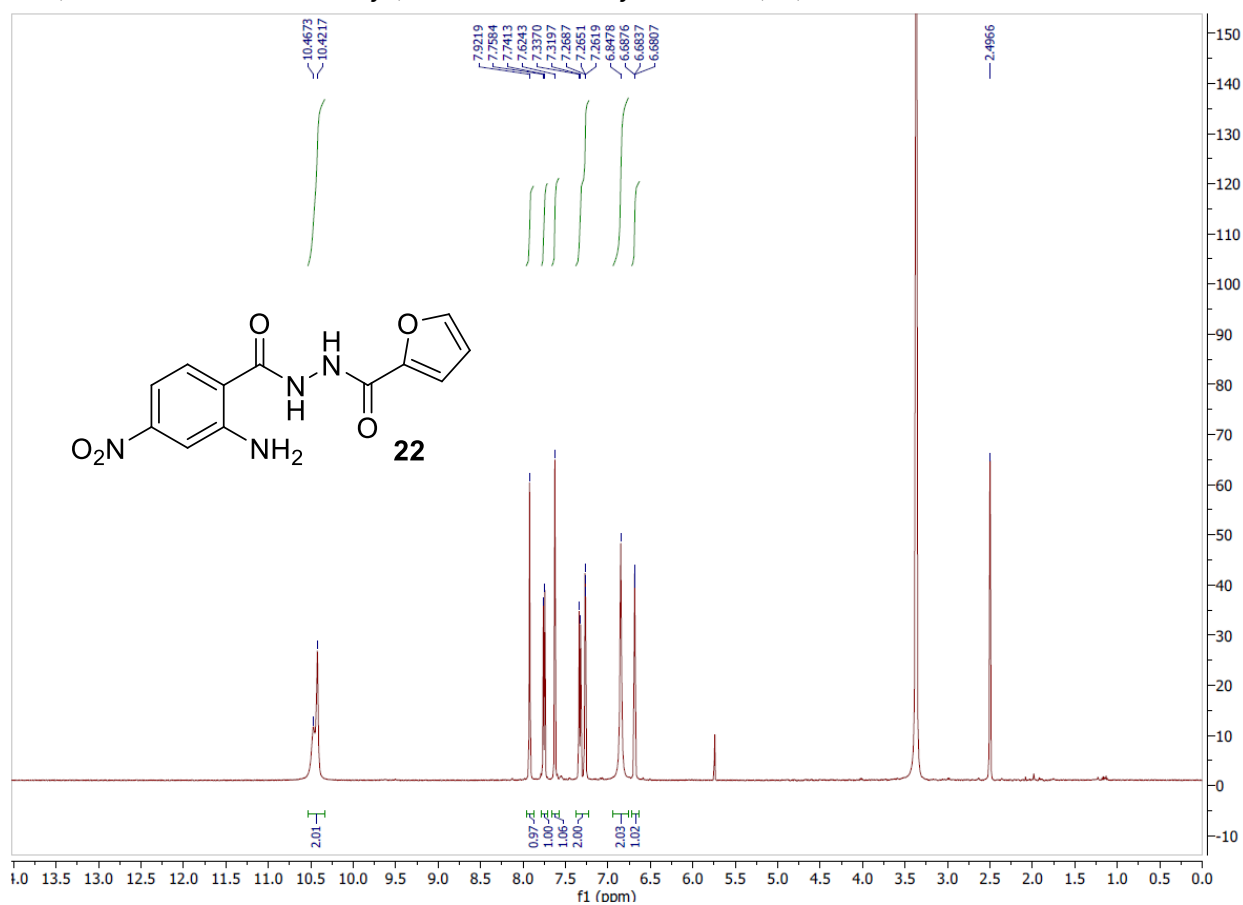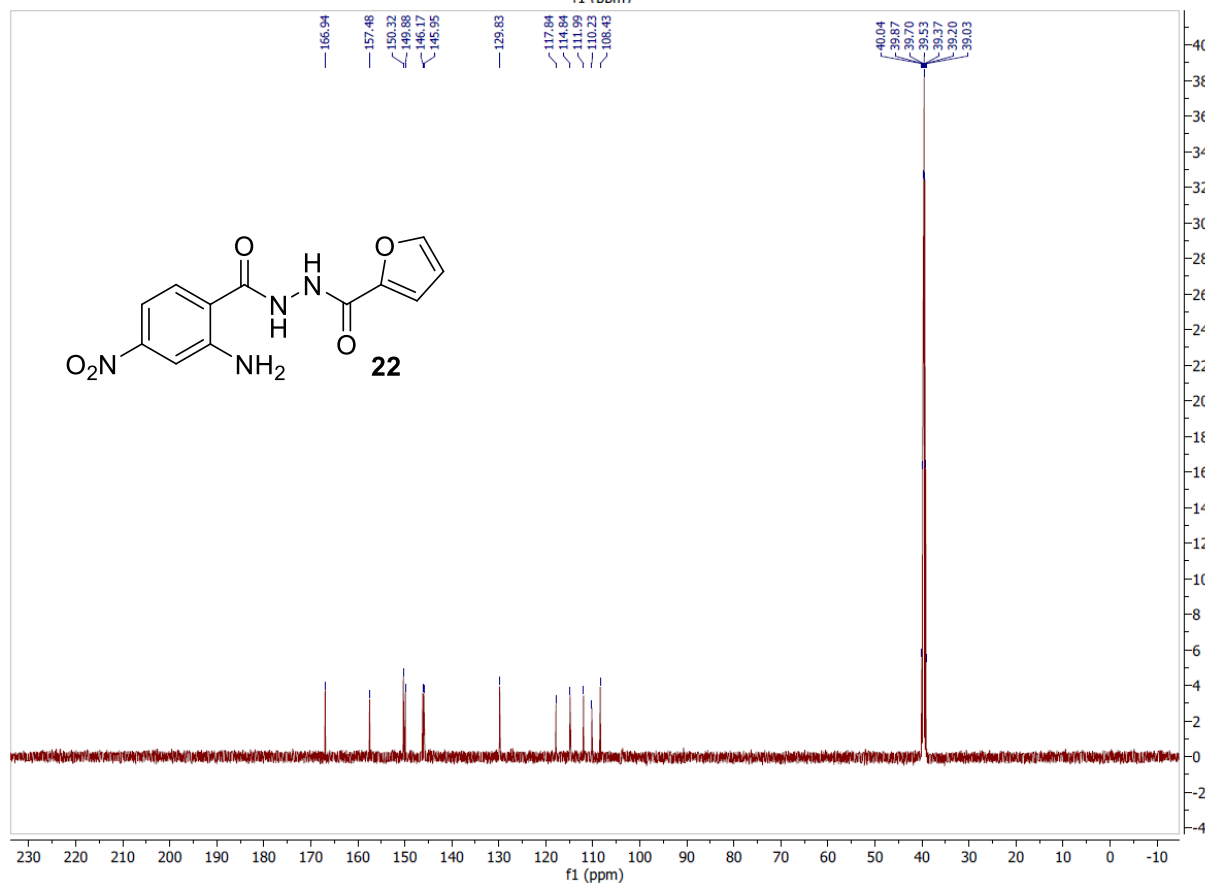

KX24\_02\_Recal#425 RT: 6.57 AV: 1 NL: 3.94E7  
T: FTMS + p ESI Full ms [200.00-1500.00]

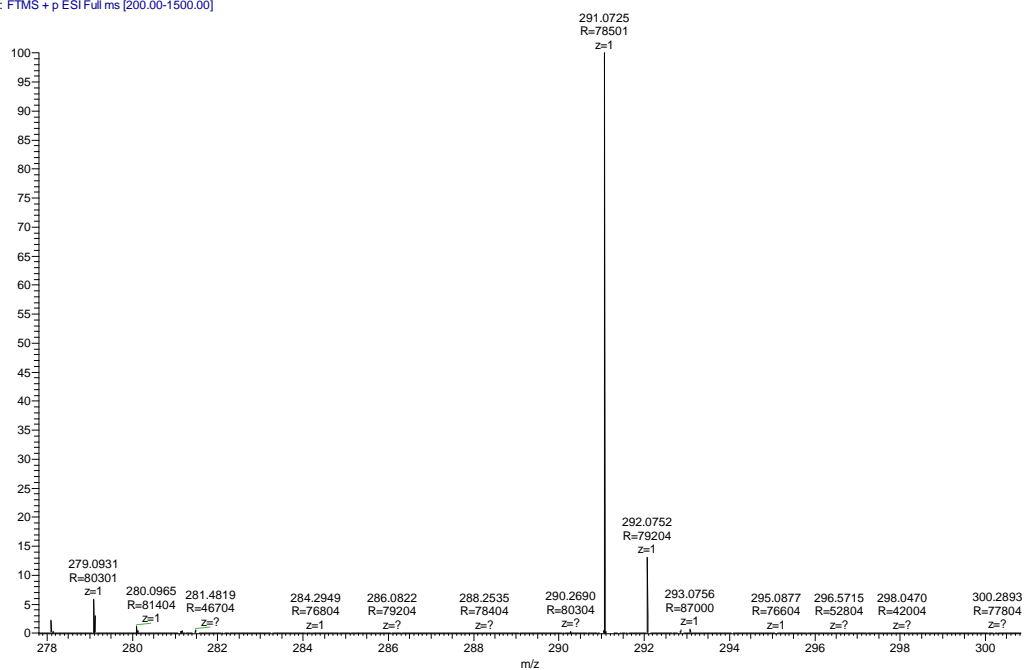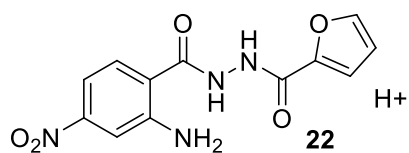

Chemical Formula:  $C_{12}H_{11}N_4O_5^+$   
Exact Mass: 291,0724

2-amino-*N'*-benzoyl-5-nitrobenzohydrazide (**23**):

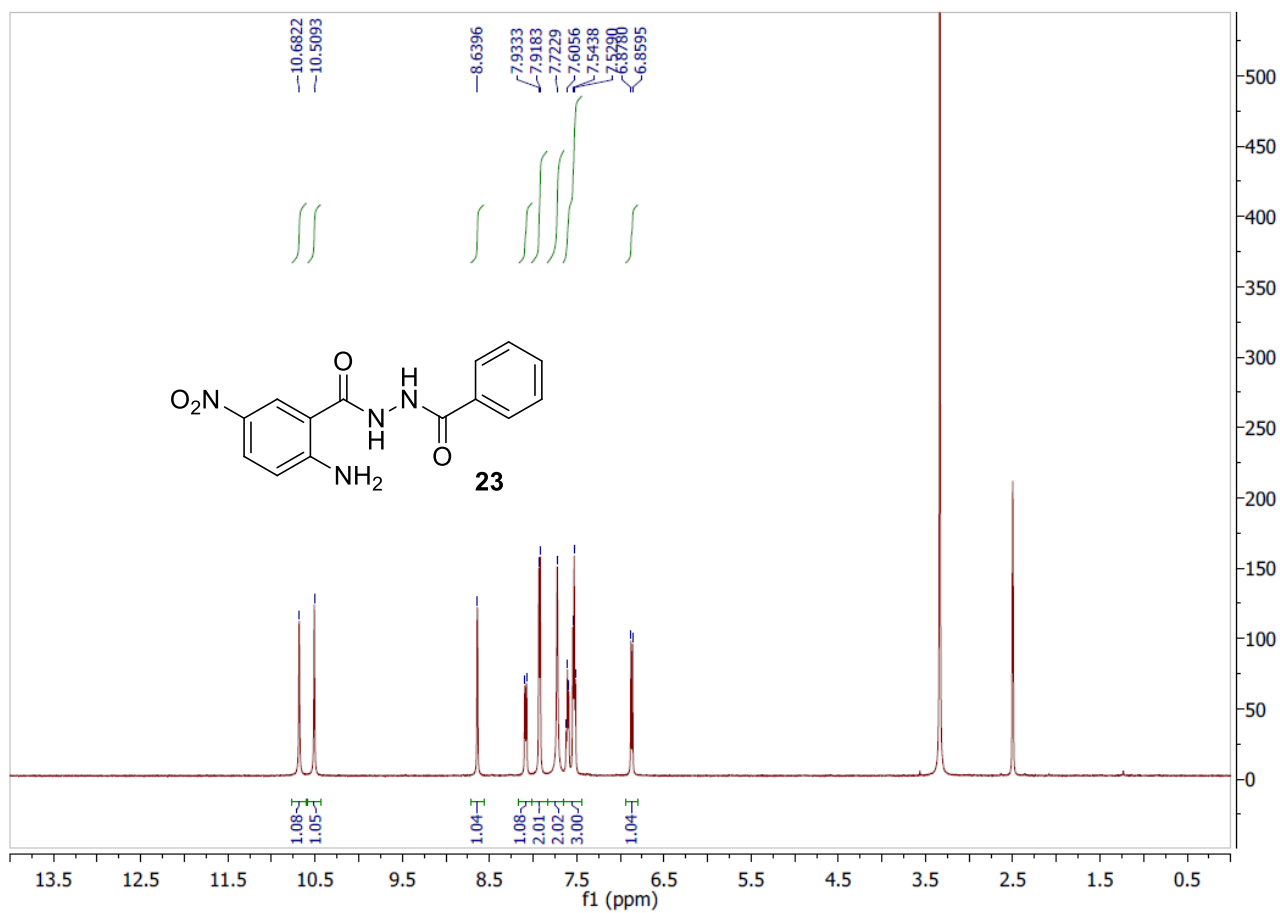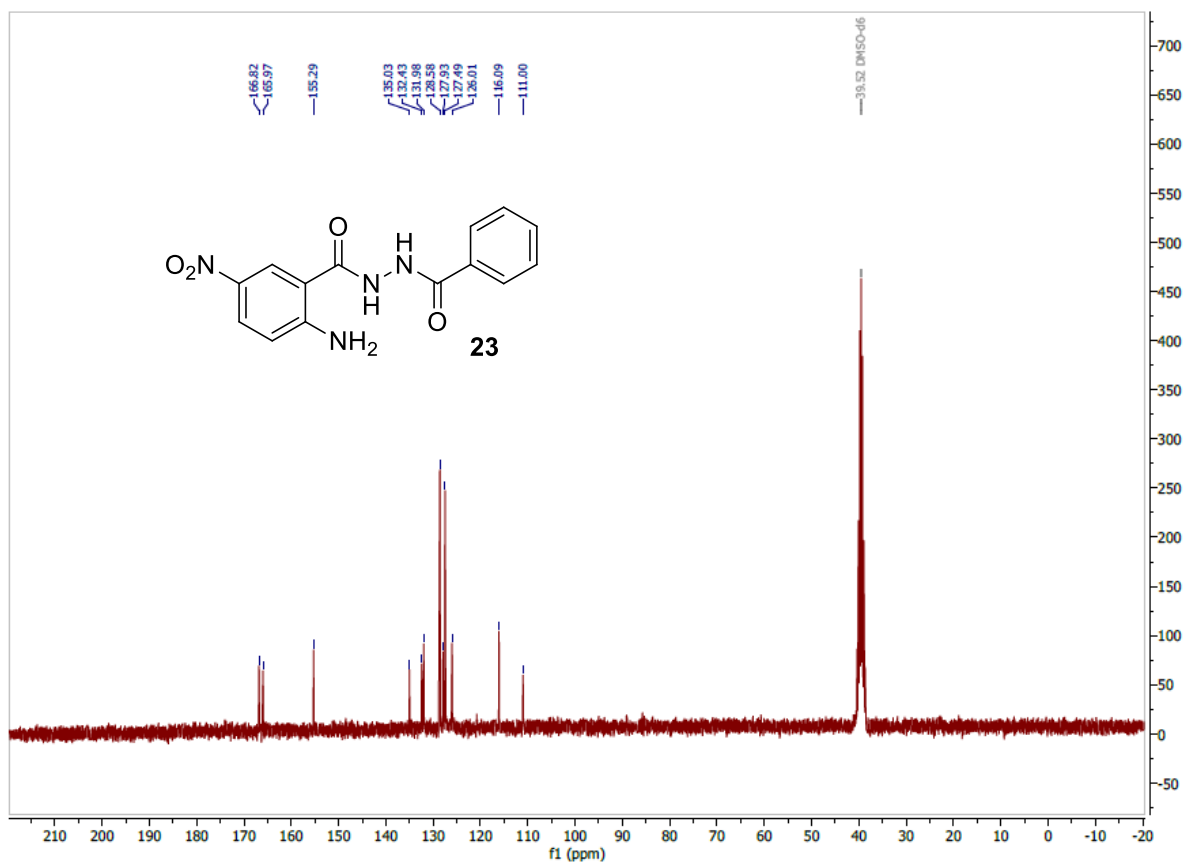

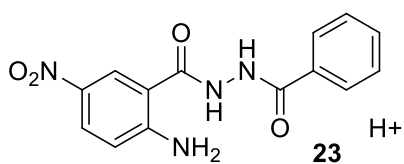

Chemical Formula:  $C_{14}H_{13}N_4O_4^+$

Exact Mass: 301,0931

Molecular Weight: 301,2769

KX27 #422 RT: 6.84 AV: 1 NL: 5.91E6  
T: FTMS +p ESI Full ms [200.00-1500.00]

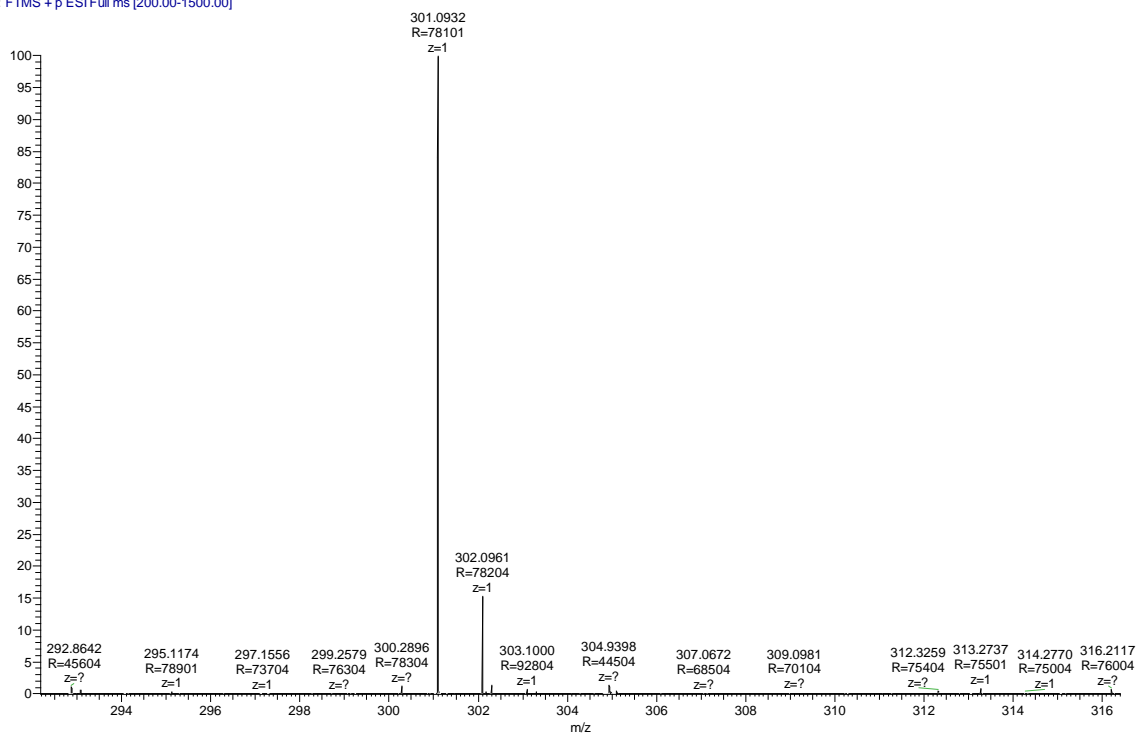



*N'*-(2-amino-5-nitrobenzoyl)furan-2-carbohydrazide (**24**)

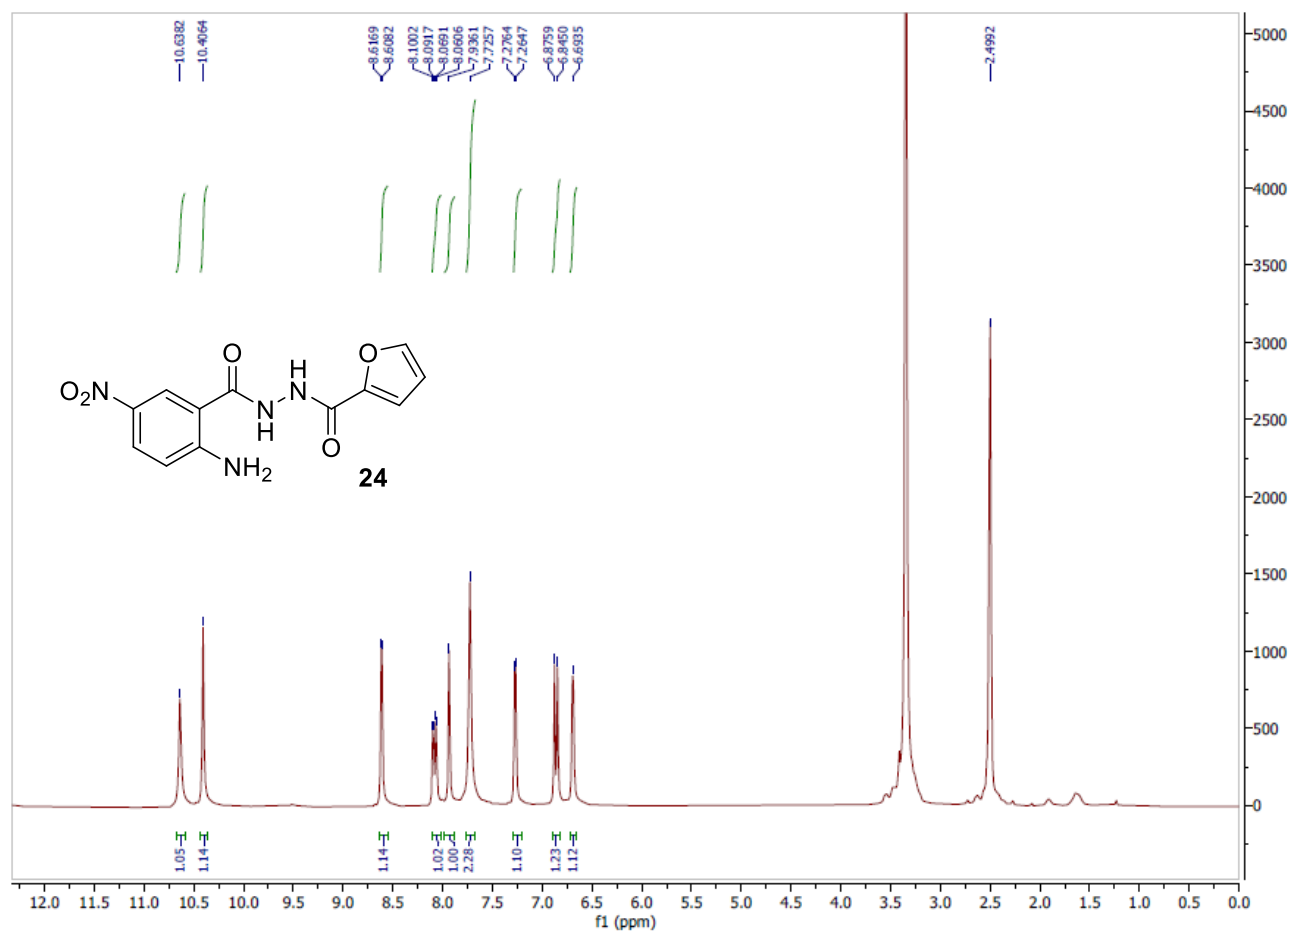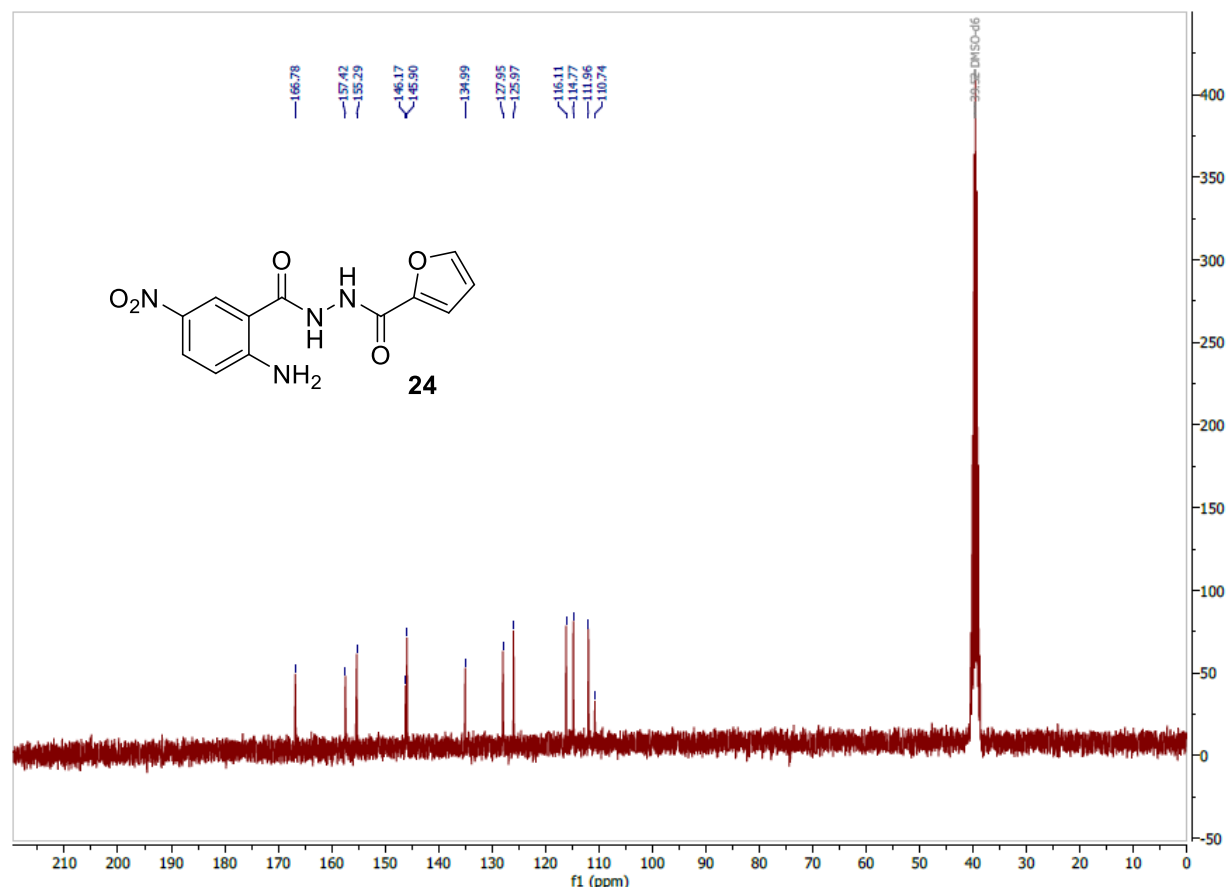

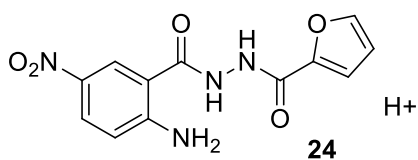

Chemical Formula:  $C_{12}H_{11}N_4O_5^+$

Exact Mass: 291,0724

Molecular Weight: 291,2390

8 #482-488 RT: 9.89-10.16 AV: 7 NL: 5.07E5  
T: FTMS + p ESI Full ms [100.00-600.00]

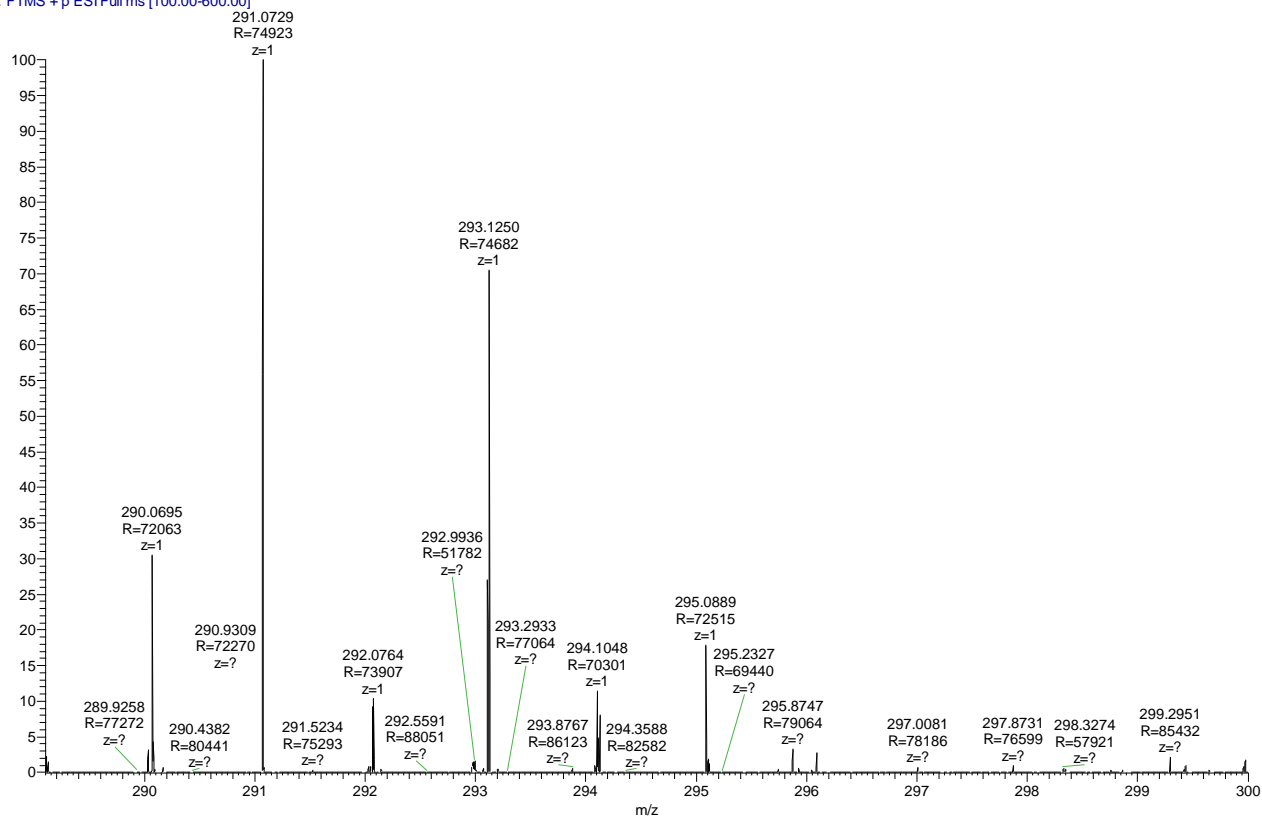

## S.2. Gel electrophoresis pictures of AA DACHZs 1-24 and AA II a-h

### S.2.1.

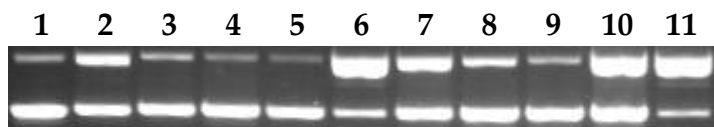

Form II% : 37 20 16 16 55 42 28 21 42 59

Form III% : 0 0 0 0 4 4 0 0 4 6

| lane | 312nm, 15cm, 30min, pH=6.8,<br>DMSO, C = 500 $\mu$ M |         |      |            |      |
|------|------------------------------------------------------|---------|------|------------|------|
| 1    | DNA + UV +                                           | Control | lane |            |      |
| 2    | DNA + UV +                                           | II d    | 7    | DNA + UV + | II d |
| 3    | DNA + UV +                                           | 13      | 8    | DNA + UV + | 13   |
| 4    | DNA + UV +                                           | 14      | 9    | DNA + UV + | 14   |
| 5    | DNA + UV +                                           | 15      | 10   | DNA + UV + | 15   |
| 6    | DNA + UV +                                           | 16      | 11   | DNA + UV + | 16   |

### Gel S.2.1: Compounds 13-16 and II d

### S.2.2.

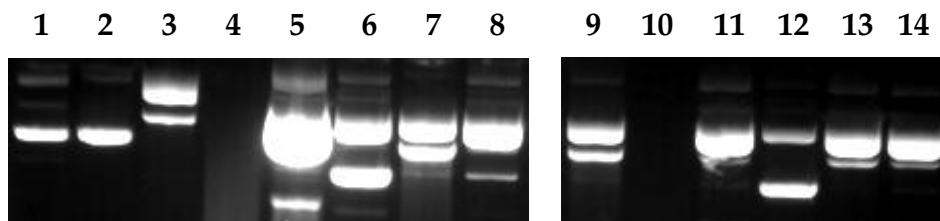

Form II% : 63 - 0 0 49 77 54 - 100 20 73 87

Form III% : 37 - 80 51 38 0 46 - 0 0 2 13

| lane | 312nm, 15cm, 30min, pH=6.8<br>DMSO, C = 500 $\mu$ M |         |      |            |      |
|------|-----------------------------------------------------|---------|------|------------|------|
| 1    | DNA + UV                                            | Control |      |            |      |
| 2    | DNA                                                 | Control | lane |            |      |
| 3    | DNA + UV +                                          | II c    | 9    | DNA + UV + | II c |
| 4    | DNA + UV +                                          | 9       | 10   | DNA + UV + | 9    |
| 5    | DNA + UV +                                          | 10      | 11   | DNA + UV + | 10   |
| 6    | DNA + UV +                                          | 11      | 12   | DNA + UV + | 11   |
| 7    | DNA + UV +                                          | 12      | 13   | DNA + UV + | 12   |
| 8    | DNA + UV +                                          | 8       | 14   | DNA + UV + | 8    |

### Gel S.2.2: Compounds 8-12 and II c

### S.2.3.

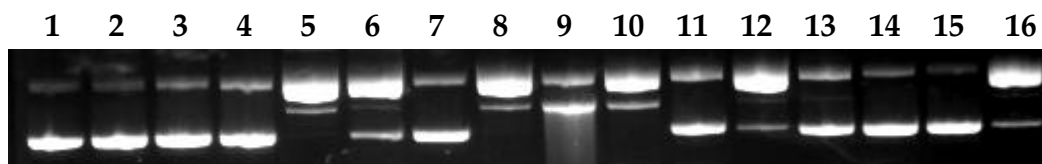

|             |   |    |    |    |    |    |    |    |    |    |    |    |   |   |    |
|-------------|---|----|----|----|----|----|----|----|----|----|----|----|---|---|----|
| Form II% :  | 4 | 11 | 19 | 88 | 65 | 18 | 84 | 35 | 75 | 25 | 78 | 21 | 7 | - | 83 |
| Form III% : | 0 | 0  | 0  | 12 | 6  | 0  | 16 | 65 | 25 | 0  | 4  | 0  | 0 | - | 0  |

| lane | 312nm, 15cm, 30min, pH=6.8,<br>DMSO, C= 500 $\mu$ M |         | lane |            |    |
|------|-----------------------------------------------------|---------|------|------------|----|
| 1    | DNA + UV +                                          | Control | 9    | DNA + UV + | 9  |
| 2    | DNA + UV +                                          | 2       | 10   | DNA + UV + | 10 |
| 3    | DNA + UV +                                          | 3       | 11   | DNA + UV + | 11 |
| 4    | DNA + UV +                                          | 4       | 12   | DNA + UV + | 12 |
| 5    | DNA + UV +                                          | 5       | 13   | DNA + UV + | 13 |
| 6    | DNA + UV +                                          | 6       | 14   | DNA + UV + | 14 |
| 7    | DNA + UV +                                          | 7       | 15   | DNA + UV + | 15 |
| 8    | DNA + UV +                                          | 8       | 16   | DNA + UV + | 16 |

Gel S.2.3: Compounds 1-16

### S.2.4.

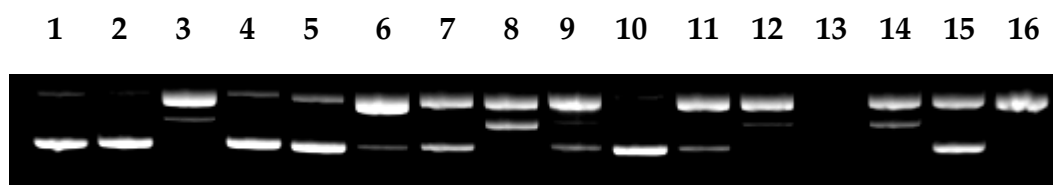

|             |   |    |   |    |    |    |    |    |   |    |    |   |    |    |     |
|-------------|---|----|---|----|----|----|----|----|---|----|----|---|----|----|-----|
| Form II% :  | 0 | 92 | 5 | 13 | 90 | 56 | 64 | 77 | 0 | 80 | 95 | - | 80 | 42 | 100 |
| Form III% : | 0 | 8  | 0 | 0  | 0  | 0  | 36 | 2  | 0 | 0  | 5  | - | 20 | 0  | 0   |

| $\Sigma$ ειqά | 312nm, 15cm, 30min, pH=6.8,<br>DMSO, C= 500 $\mu$ M |            |    |            |      |
|---------------|-----------------------------------------------------|------------|----|------------|------|
| 1             | DNA + UV +                                          | Control    | 9  | DNA + UV + | II d |
| 2             | DNA + UV +                                          | II a       | 10 | DNA + UV + | II g |
| 3             | DNA + UV +                                          | irrelevant | 11 | DNA + UV + | II f |
| 4             | DNA + UV +                                          | II h       | 12 | DNA + UV + | II c |
| 5             | DNA + UV +                                          | irrelevant | 13 | DNA + UV + | 9    |
| 6             | DNA + UV +                                          | II e       | 14 | DNA + UV + | 10   |
| 7             | DNA + UV +                                          | irrelevant | 15 | DNA + UV + | 11   |
| 8             | DNA + UV +                                          | II b       | 16 | DNA + UV + | 12   |

Gel S.2.4: Compounds II a-g, 9-12

### S.2.5.

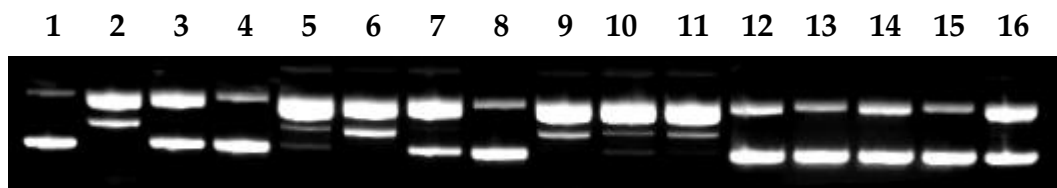

Form II% : 69 42 13 85 68 59 3 80 89 87 24 13 25 11 41  
 Form III% : 31 0 0 9 32 0 0 20 7 13 0 0 0 0 0

| lane | 312nm, 15cm, 30min, pH=6.8, DMSO, C= 500 $\mu$ M |         | lane |            |      |
|------|--------------------------------------------------|---------|------|------------|------|
| 1    | DNA + UV +                                       | Control | 10   | DNA + UV + | 17   |
| 2    | DNA + UV +                                       | 5       | 11   | DNA + UV + | 18   |
| 3    | DNA + UV +                                       | 6       | 12   | DNA + UV + | 19   |
| 4    | DNA + UV +                                       | 7       | 13   | DNA + UV + | 20   |
| 5    | DNA + UV +                                       | 8       | 14   | DNA + UV + | 19   |
| 6    | DNA + UV +                                       | 5       | 15   | DNA + UV + | 20   |
| 7    | DNA + UV +                                       | 6       | 16   | DNA + UV + | II f |
| 8    | DNA + UV +                                       | 7       |      |            |      |
| 9    | DNA + UV +                                       | 8       |      |            |      |

Gel S.2.5: Compounds II f, 5-8, 17-20

### S.2.6.

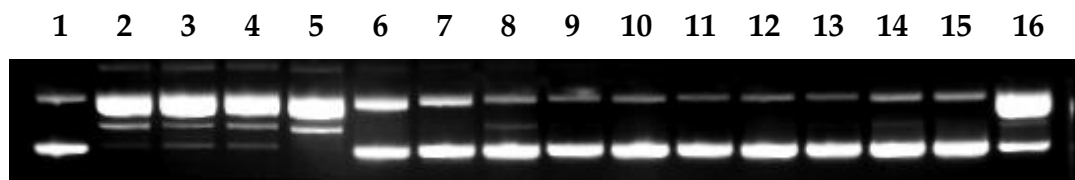

Form II% : 80 80 74 73 25 11 0 0 0 0 0 0 0 0 55  
 Form III% : 17 11 15 27 0 0 7 0 0 0 0 0 0 3 4

| lane | 312nm, 15cm, 30min, pH=6.8, DMSO, C $\tau\epsilon\lambda$ = 500 $\mu$ M |         | lane |            |      |
|------|-------------------------------------------------------------------------|---------|------|------------|------|
| 1    | DNA + UV +                                                              | Control | 8    | DNA + UV + | 21   |
| 2    | DNA + UV +                                                              | 17      | 9    | DNA + UV + | 22   |
| 3    | DNA + UV +                                                              | 18      | 10   | DNA + UV + | 21   |
| 4    | DNA + UV +                                                              | 17      | 11   | DNA + UV + | 22   |
| 5    | DNA + UV +                                                              | 18      | 12   | DNA + UV + | 21   |
| 6    | DNA + UV +                                                              | 19      | 13   | DNA + UV + | 22   |
| 7    | DNA + UV +                                                              | 20      | 14   | DNA + UV + | II g |
|      |                                                                         |         | 15   | DNA + UV + | II h |
|      |                                                                         |         | 16   | DNA + UV + | II e |

Gel S.2.6: Compounds II e,g,h, 17-22

## S.2.7.

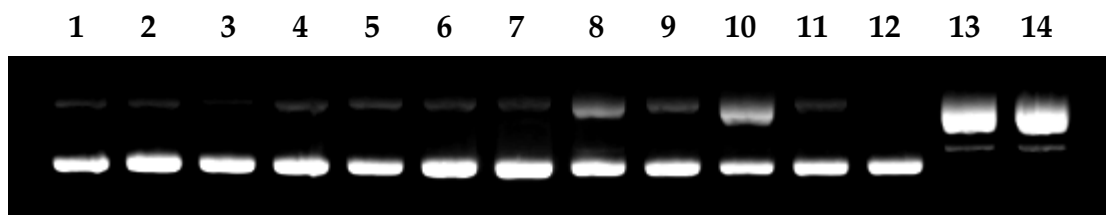

Form II% : 0 0 2 3 1 1 20 6 38 2 0 96 96  
 Form III% : 0 0 0 0 0 0 0 0 0 0 0 4 4

| lane | 312nm, 15cm, 30min, pH=6.8, DMSO, C=500 $\mu$ M |         |      |            |    |
|------|-------------------------------------------------|---------|------|------------|----|
| 1    | DNA + UV +                                      | Control | lane |            |    |
| 2    | DNA + UV +                                      | 1       | 10   | DNA + UV + | 13 |
| 3    | DNA + UV +                                      | 2       | 11   | DNA + UV + | 14 |
| 4    | DNA + UV +                                      | 3       | 12   | DNA + UV + | 15 |
| 5    | DNA + UV +                                      | 4       | 13   | DNA + UV + | 16 |
| 6    | DNA + UV +                                      | 1       | 14   | DNA + UV + | 8  |
| 7    | DNA + UV +                                      | 2       |      |            |    |
| 8    | DNA + UV +                                      | 3       |      |            |    |
| 9    | DNA + UV +                                      | 4       |      |            |    |

Gel S.2.7: Compounds 1-4, 8, 13-16

## S.2.8.

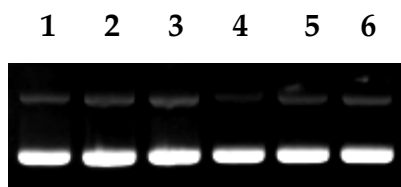

Form II% : 0 0 0 0 0 0  
 Form III% : 0 0 0 0 0 0

| lane | 312nm, 15cm, 30min, pH=6.8, DMSO, C=500 $\mu$ M |    |
|------|-------------------------------------------------|----|
| 1    | DNA + UV +                                      | 23 |
| 2    | DNA + UV +                                      | 24 |
| 3    | DNA + UV +                                      | 23 |
| 4    | DNA + UV +                                      | 24 |
| 5    | DNA + UV +                                      | 23 |
| 6    | DNA + UV +                                      | 24 |

Gel S.2.8: Compounds 23-24

### S.3. Gel electrophoresis pictures of 9 at various concentrations, pH studies and mechanistic studies

#### S.3.1

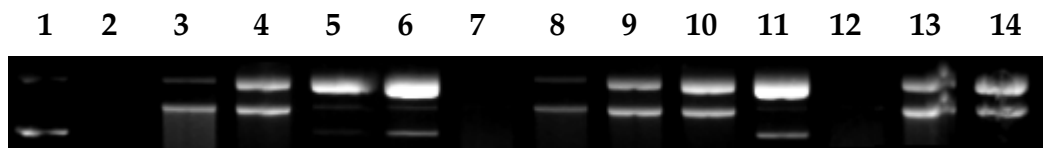

Form II% : - 7 50 92 84 - 14 46 60 85 - 41 62  
 Form III% : - 93 50 4 3 - 86 54 40 2 - 59 38

| lane | 312nm, 15cm, 30min, pH=6.8, DMSO, compound 9 |             | lane |            |             |
|------|----------------------------------------------|-------------|------|------------|-------------|
| 1    | DNA + UV +                                   | Control     | 8    | DNA + UV + | 200 $\mu$ M |
| 2    | DNA + UV +                                   | 400 $\mu$ M | 9    | DNA + UV + | 100 $\mu$ M |
| 3    | DNA + UV +                                   | 200 $\mu$ M | 10   | DNA + UV + | 50 $\mu$ M  |
| 4    | DNA + UV +                                   | 100 $\mu$ M | 11   | DNA + UV + | 10 $\mu$ M  |
| 5    | DNA + UV +                                   | 50 $\mu$ M  | 12   | DNA + UV + | 400 $\mu$ M |
| 6    | DNA + UV +                                   | 10 $\mu$ M  | 13   | DNA + UV + | 200 $\mu$ M |
| 7    | DNA + UV +                                   | 400 $\mu$ M | 14   | DNA + UV + | 200 $\mu$ M |

Gel S.3.1: Compound 9 from 400 to 10  $\mu$ M

#### S.3.2

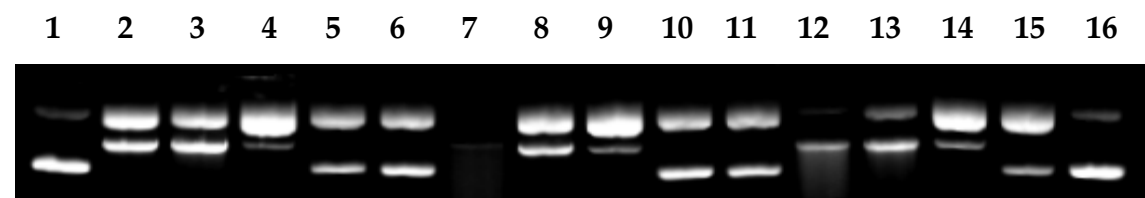

Form II% : 59 49 93 53 44 - 66 88 43 47 - 24 86 70 2  
 Form III% : 41 51 7 0 0 - 34 12 0 0 - 76 14 0 0

| lane | 312nm, 15cm, 30min, pH=6.8, DMSO, Compound 9 |             | lane |            |             |
|------|----------------------------------------------|-------------|------|------------|-------------|
| 1    | DNA + UV +                                   | Control     | 9    | DNA + UV + | 10 $\mu$ M  |
| 2    | DNA + UV +                                   | 100 $\mu$ M | 10   | DNA + UV + | 1 $\mu$ M   |
| 3    | DNA + UV +                                   | 50 $\mu$ M  | 11   | DNA + UV + | 500nM       |
| 4    | DNA + UV +                                   | 10 $\mu$ M  | 12   | DNA + UV + | 100 $\mu$ M |
| 5    | DNA + UV +                                   | 1 $\mu$ M   | 13   | DNA + UV + | 50 $\mu$ M  |
| 6    | DNA + UV +                                   | 500nM       | 14   | DNA + UV + | 10 $\mu$ M  |
| 7    | DNA + UV +                                   | 100 $\mu$ M | 15   | DNA + UV + | 1 $\mu$ M   |
| 8    | DNA + UV +                                   | 50 $\mu$ M  | 16   | DNA + UV + | 500nM       |

Gel S.3.2: Compound 9 from 100 to 0.5  $\mu$ M

### S.3.3

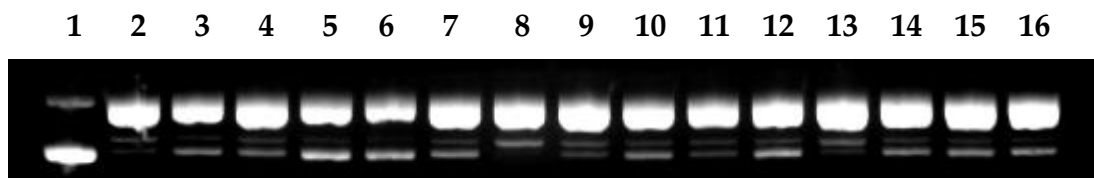

Form II% : 94 83 85 65 68 81 88 88 82 90 77 90 84 84 86  
Form III% : 4 1 4 2 1 4 12 6 4 4 3 7 3 2 1

| lane | 312nm, 15cm, 30min, DMSO, C= 5μM |        | lane |              |        |
|------|----------------------------------|--------|------|--------------|--------|
| 1    | DNA + UV Control                 | pH 6.8 | 8    | DNA + UV + 9 | pH 5   |
| 2    | DNA + UV + 9                     | pH 5   | 9    | DNA + UV + 9 | pH 6.0 |
| 3    | DNA + UV + 9                     | pH 6.0 | 10   | DNA + UV + 9 | pH 8.1 |
| 4    | DNA + UV + 9                     | pH 6.8 | 11   | DNA + UV + 9 | pH 8.9 |
| 5    | DNA + UV + 9                     | pH 8.1 | 12   | DNA + UV + 9 | pH 10  |
| 6    | DNA + UV + 9                     | pH 8.9 | 13   | DNA + UV + 9 | pH 5   |
| 7    | DNA + UV + 9                     | pH 10  | 14   | DNA + UV + 9 | pH 6.0 |
|      |                                  |        | 15   | DNA + UV + 9 | pH 8.1 |
|      |                                  |        | 16   | DNA + UV + 9 | pH 8.9 |

Gel S.3.3: Compound 9 from pH 5-10

### S.3.4

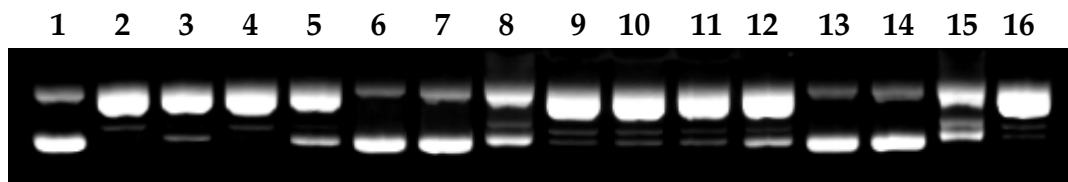

FII%: 97 89 97 65 0 0 41 92 90 90 72 0 0 42 96  
FIII%: 3 0 3 1 0 0 6 4 3 2 2 0 0 16 2

| lane | 312nm, 15cm, 30min, pH=6.8, DMSO, C=5μM |                          | lane |              |                          |
|------|-----------------------------------------|--------------------------|------|--------------|--------------------------|
| 1    | DNA + UV +                              | Control                  | 9    | DNA + UV + 9 | air                      |
| 2    | DNA + UV + 9                            | air                      | 10   | DNA + UV + 9 | argon                    |
| 3    | DNA + UV + 9                            | argon                    | 11   | DNA + UV + 9 | L-cyst (1500 μM)         |
| 4    | DNA + UV + 9                            | L-cyst (1500 μM)         | 12   | DNA + UV + 9 | KI (250 μM)              |
| 5    | DNA + UV + 9                            | KI (250 μM)              | 13   | DNA + UV + 9 | NaN <sub>3</sub> (20 mM) |
| 6    | DNA + UV + 9                            | NaN <sub>3</sub> (20 mM) | 14   | DNA + UV + 9 | D <sub>2</sub> O         |
| 7    | DNA + UV + 9                            | D <sub>2</sub> O         | 15   | DNA + UV + 9 | DMSO 20%                 |
| 8    | DNA + UV + 9                            | DMSO 20%                 | 16   | DNA + UV + 9 | air                      |

Gel S.3.4: Compound 9, mechanistic studies



#### S.4. UV-vis spectra of AA DACHZs 1-24, in DMSO

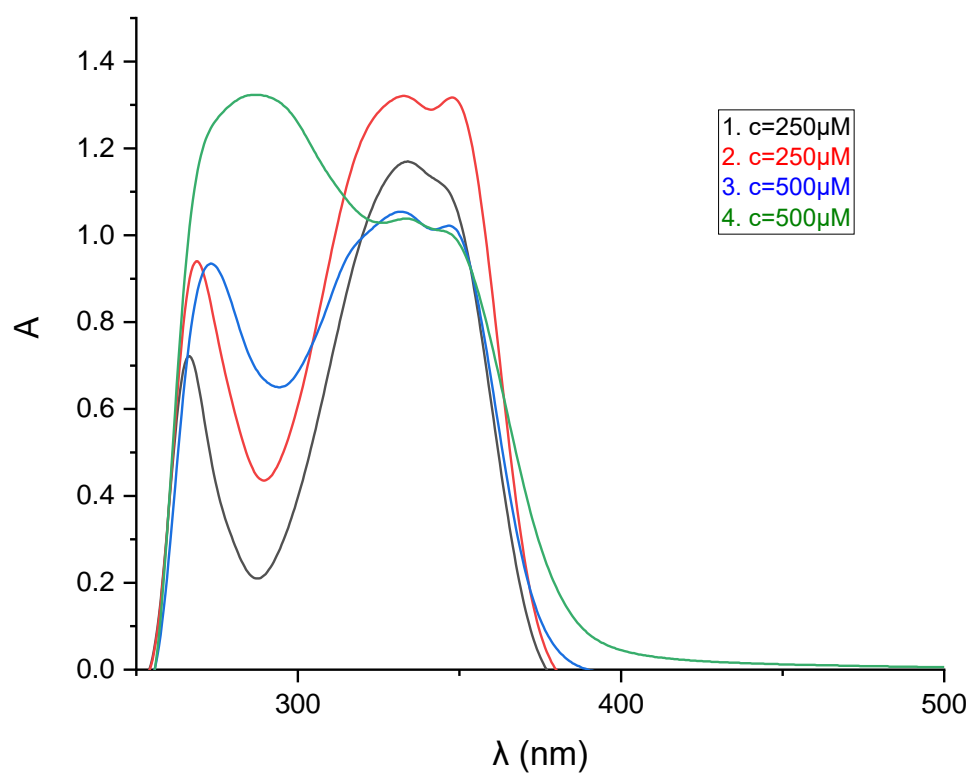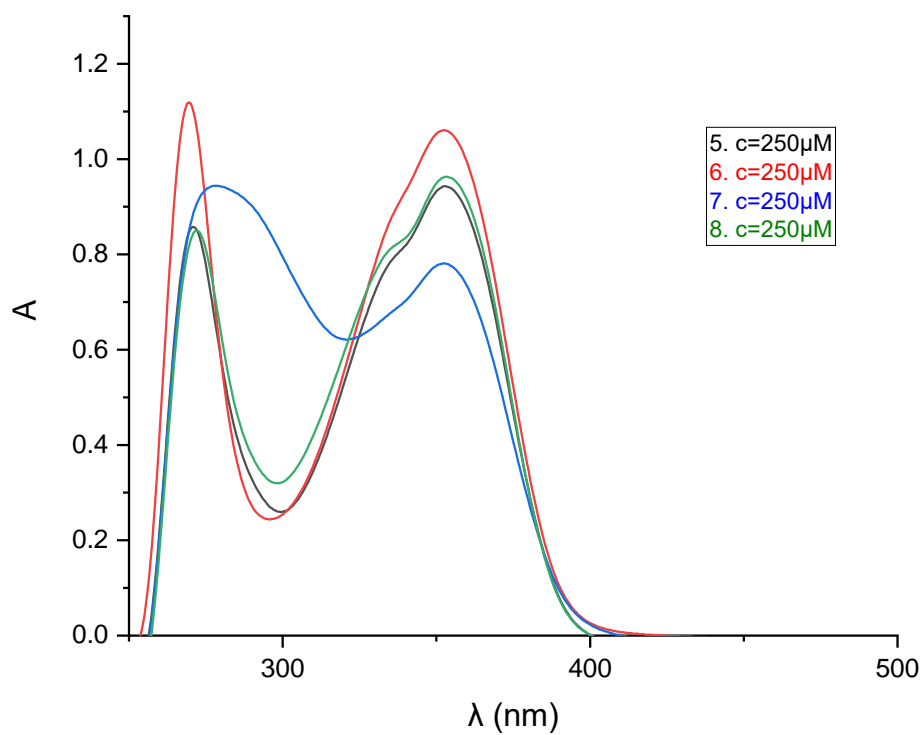

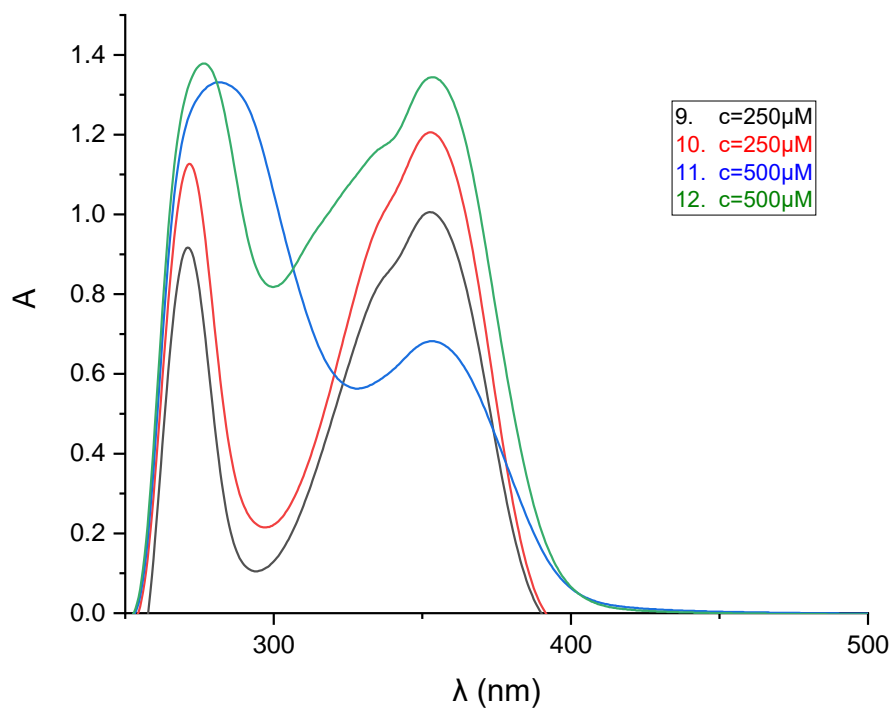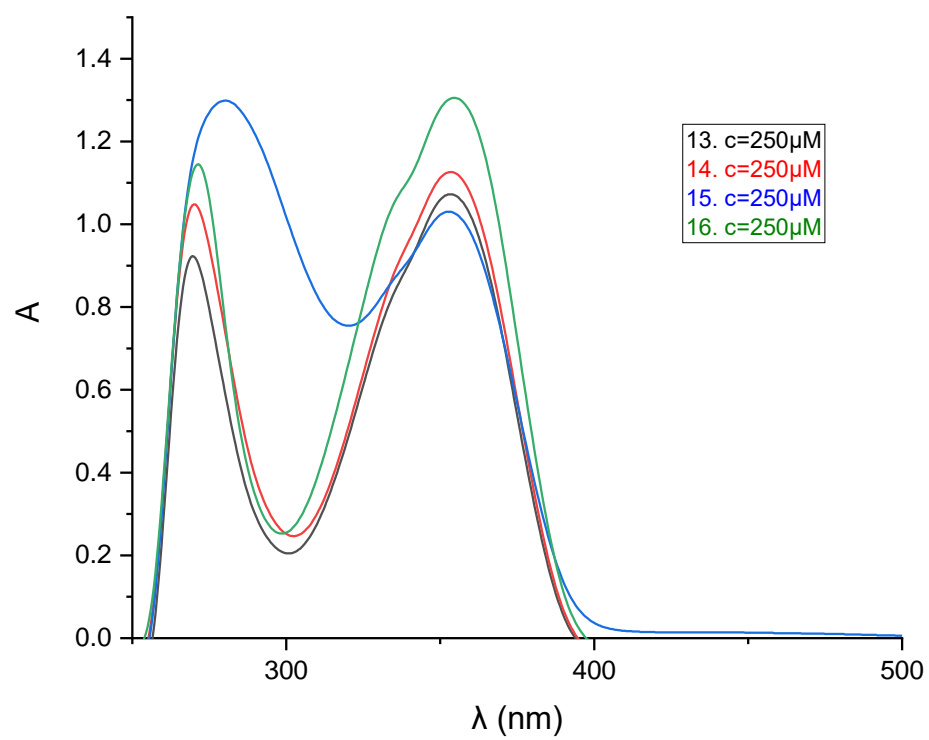

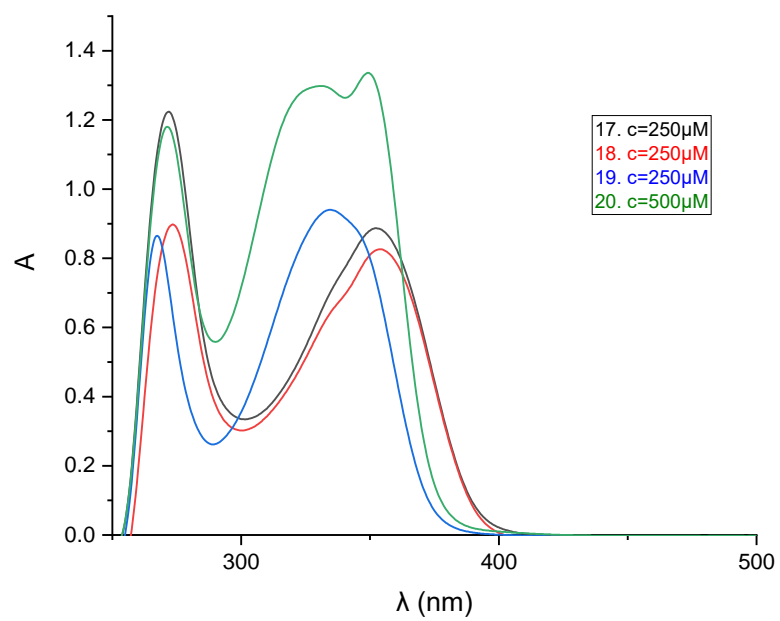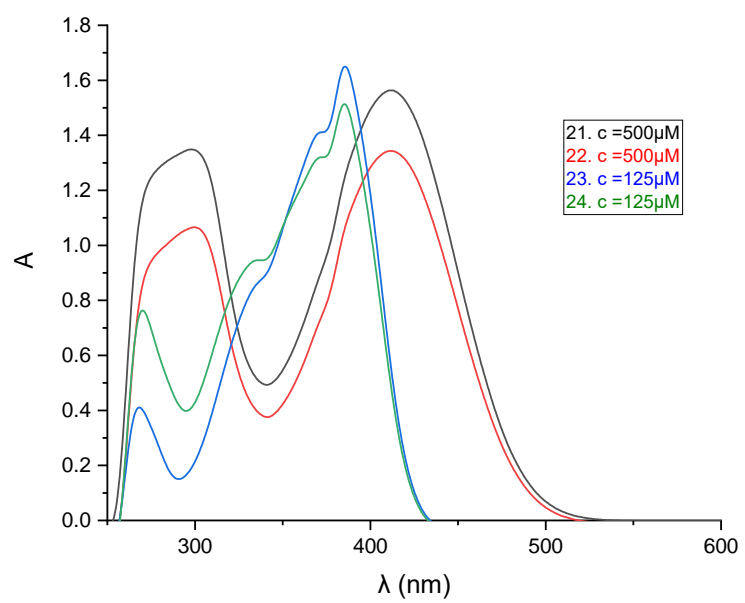

## S.5. Gel electrophoresis pictures of compounds 1-24 (UV-A)

### S.5.1

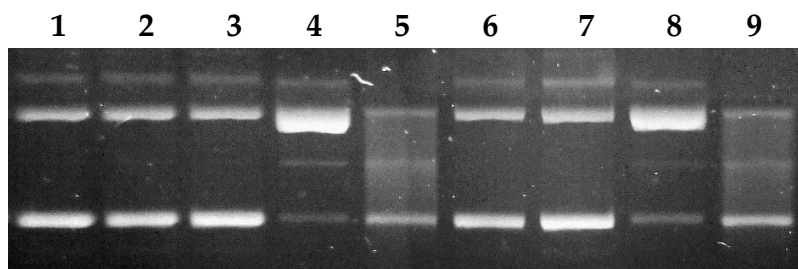

Form II% :            38      33      66      40      38      36      60      37  
 Form III%:                      12      23                      14      24

| lane | 365nm, 10cm, 120min,<br>DMSO, C = 500 $\mu$ M |         | lane |            |   |
|------|-----------------------------------------------|---------|------|------------|---|
| 1    | DNA + UV +                                    | Control | 6    | DNA + UV + | 1 |
| 2    | DNA + UV +                                    | 1       | 7    | DNA + UV + | 2 |
| 3    | DNA + UV +                                    | 2       | 8    | DNA + UV + | 3 |
| 4    | DNA + UV +                                    | 3       | 9    | DNA + UV + | 4 |
| 5    | DNA + UV +                                    | 4       |      |            |   |

Gel S.5.1: Compounds 1-4

### S.5.2

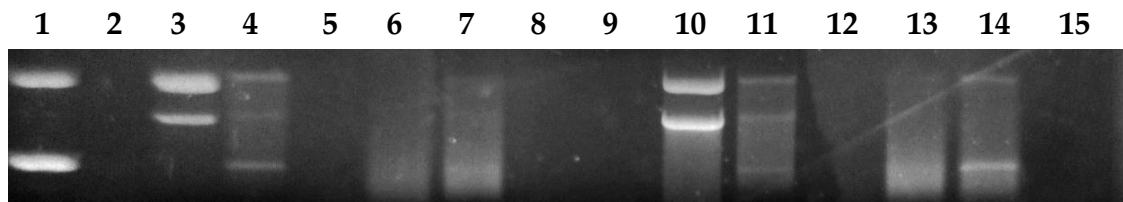

Form II%:            57      49                      37      42  
 Form III%:            29      23                      49      31

| lane | 365nm, 10cm, 120min,<br>DMSO, C = 500 $\mu$ M |         | lane |            |    |
|------|-----------------------------------------------|---------|------|------------|----|
| 1    | DNA + UV +                                    | Control | 9    | DNA + UV + | 5  |
| 2    | DNA + UV +                                    | 5       | 10   | DNA + UV + | 6  |
| 3    | DNA + UV +                                    | 6       | 11   | DNA + UV + | 7  |
| 4    | DNA + UV +                                    | 7       | 12   | DNA + UV + | 8  |
| 5    | DNA + UV +                                    | 8       | 13   | DNA + UV + | 19 |
| 6    | DNA + UV +                                    | 19      | 14   | DNA + UV + | 20 |
| 7    | DNA + UV +                                    | 20      | 15   | DNA + UV + | 9  |
| 8    | DNA + UV +                                    | 9       |      |            |    |

Gel S.5.2: Compounds 5-9 & 19-20

### S.5.3

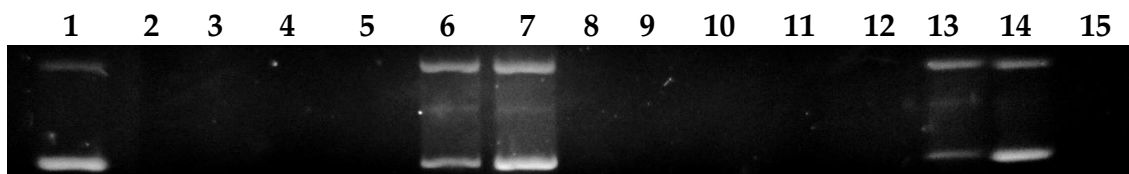

Form II% : 33 30 36 28  
Form III%: 27 20 18 9

| lane | 365nm, 10cm, 120min,<br>DMSO, C = 100 $\mu$ M |         |      |            |    |
|------|-----------------------------------------------|---------|------|------------|----|
| 1    | DNA + UV +                                    | Control | lane |            |    |
| 2    | DNA + UV +                                    | 5       | 9    | DNA + UV + | 5  |
| 3    | DNA + UV +                                    | 6       | 10   | DNA + UV + | 6  |
| 4    | DNA + UV +                                    | 7       | 11   | DNA + UV + | 7  |
| 5    | DNA + UV +                                    | 8       | 12   | DNA + UV + | 8  |
| 6    | DNA + UV +                                    | 19      | 13   | DNA + UV + | 19 |
| 7    | DNA + UV +                                    | 20      | 14   | DNA + UV + | 20 |
| 8    | DNA + UV +                                    | 9       | 15   | DNA + UV + | 9  |

Gel S.5.3: Compounds 5-9 & 19-20

### S.5.4

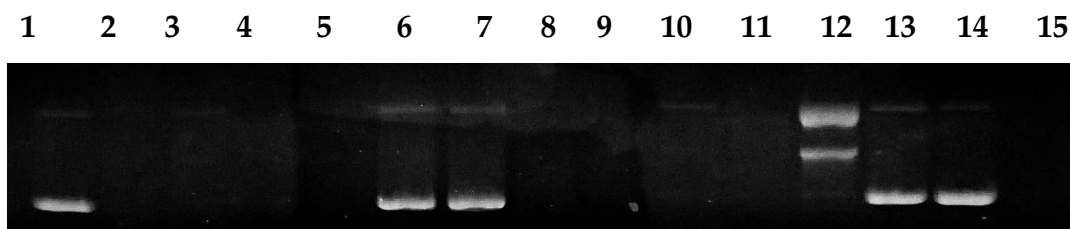

Form II% : 26 25 55 10 5  
Form III%: 33

| lane | 365nm, 10cm, 120min,<br>DMSO, C = 10 $\mu$ M |         |      |            |    |
|------|----------------------------------------------|---------|------|------------|----|
| 1    | DNA + UV +                                   | Control | lane |            |    |
| 2    | DNA + UV +                                   | 5       | 9    | DNA + UV + | 5  |
| 3    | DNA + UV +                                   | 6       | 10   | DNA + UV + | 6  |
| 4    | DNA + UV +                                   | 7       | 11   | DNA + UV + | 7  |
| 5    | DNA + UV +                                   | 8       | 12   | DNA + UV + | 8  |
| 6    | DNA + UV +                                   | 19      | 13   | DNA + UV + | 19 |
| 7    | DNA + UV +                                   | 20      | 14   | DNA + UV + | 20 |
| 8    | DNA + UV +                                   | 9       | 15   | DNA + UV + | 9  |

Gel S.5.4: Compounds 5-9 & 19-20

### S.5.5

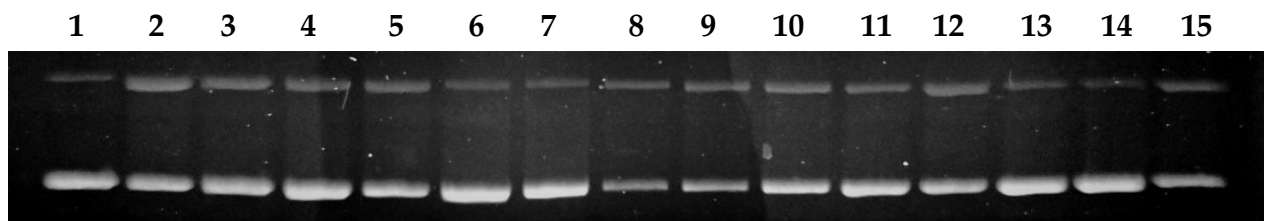

Form II% : 33 27 23 27 19 19 32 33 29 22 31 17 12 24  
Form III%:

| lane | 365nm, 10cm, 120min,<br>DMSO, C = 500 nM |         |      |            |    |
|------|------------------------------------------|---------|------|------------|----|
| 1    | DNA + UV +                               | Control | lane |            |    |
| 2    | DNA + UV +                               | 5       | 9    | DNA + UV + | 5  |
| 3    | DNA + UV +                               | 6       | 10   | DNA + UV + | 6  |
| 4    | DNA + UV +                               | 7       | 11   | DNA + UV + | 7  |
| 5    | DNA + UV +                               | 8       | 12   | DNA + UV + | 8  |
| 6    | DNA + UV +                               | 19      | 13   | DNA + UV + | 19 |
| 7    | DNA + UV +                               | 20      | 14   | DNA + UV + | 20 |
| 8    | DNA + UV +                               | 9       | 15   | DNA + UV + | 9  |

### Gel S.5.5: Compounds 5-9 & 19-20

### S.5.6

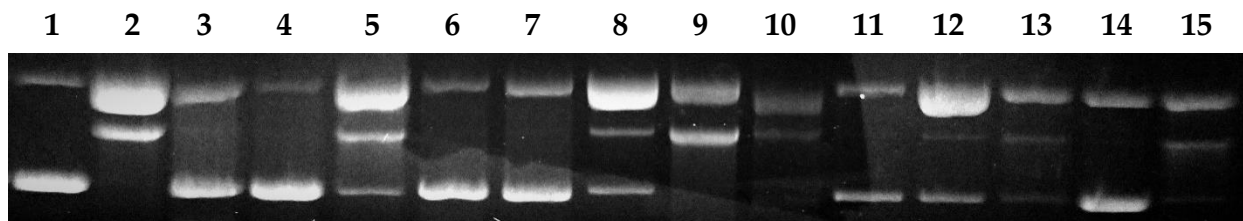

Form II% : 65 36 20 57 30 37 69 44 55 48 75 43 31 64  
Form III%: 20 25 10 38 17 7 12 28

| lane | 365nm, 10cm, 120min,<br>DMSO, C = 10 $\mu$ M |         |      |            |    |
|------|----------------------------------------------|---------|------|------------|----|
| 1    | DNA + UV +                                   | Control | lane |            |    |
| 2    | DNA + UV +                                   | 10      | 9    | DNA + UV + | 10 |
| 3    | DNA + UV +                                   | 11      | 10   | DNA + UV + | 11 |
| 4    | DNA + UV +                                   | 12      | 11   | DNA + UV + | 12 |
| 5    | DNA + UV +                                   | 13      | 12   | DNA + UV + | 13 |
| 6    | DNA + UV +                                   | 14      | 13   | DNA + UV + | 14 |
| 7    | DNA + UV +                                   | 15      | 14   | DNA + UV + | 15 |
| 8    | DNA + UV +                                   | 16      | 15   | DNA + UV + | 16 |

### Gel S.5.6: Compounds 10-16

## S.5.7

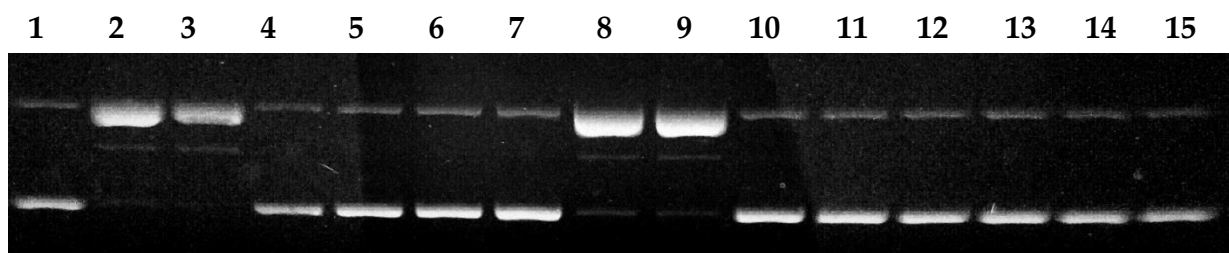

Form II% : 81 75 23 21 23 23 86 84 21 20 21 19 17 16  
 Form III%: 11 14 9 11

| lane | 365nm, 10cm, 120min,<br>DMSO, C = 10 $\mu$ M |         |      |            |                |
|------|----------------------------------------------|---------|------|------------|----------------|
| 1    | DNA + UV +                                   | Control | lane |            |                |
| 2    | DNA + UV +                                   | 17      | 9    | DNA + UV + | 18             |
| 3    | DNA + UV +                                   | 18      | 10   | DNA + UV + | 21             |
| 4    | DNA + UV +                                   | 21      | 11   | DNA + UV + | 22             |
| 5    | DNA + UV +                                   | 22      | 12   | DNA + UV + | 23             |
| 6    | DNA + UV +                                   | 23      | 13   | DNA + UV + | 24             |
| 7    | DNA + UV +                                   | 24      | 14   | DNA + UV + | 21 (5 $\mu$ M) |
| 8    | DNA + UV +                                   | 17      | 15   | DNA + UV + | 22 (5 $\mu$ M) |

## Gel S.5.7: Compounds 17-18 &amp; 21-24

## S.5.8

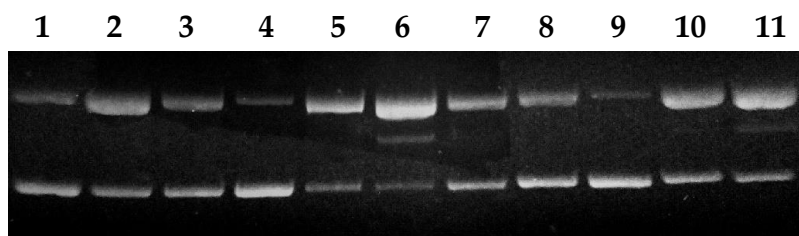

Form II%: 57 39 18 60 64 49 39 21 57 59  
 Form III%: 15 11

| lane | 365nm, 10cm, 120min,<br>DMSO, C = 2 $\mu$ M |         |    |            |   |
|------|---------------------------------------------|---------|----|------------|---|
| 1    | DNA + UV +                                  | Control |    |            |   |
| 2    | DNA + UV +                                  | 5       | 7  | DNA + UV + | 5 |
| 3    | DNA + UV +                                  | 6       | 8  | DNA + UV + | 6 |
| 4    | DNA + UV +                                  | 7       | 9  | DNA + UV + | 7 |
| 5    | DNA + UV +                                  | 8       | 10 | DNA + UV + | 8 |
| 6    | DNA + UV +                                  | 9       | 11 | DNA + UV + | 9 |

## Gel S.5.8: Compounds 5-9

**S.6. Optimized molecular geometries of compounds 1-24 at B3LYP/6-31g\* level**

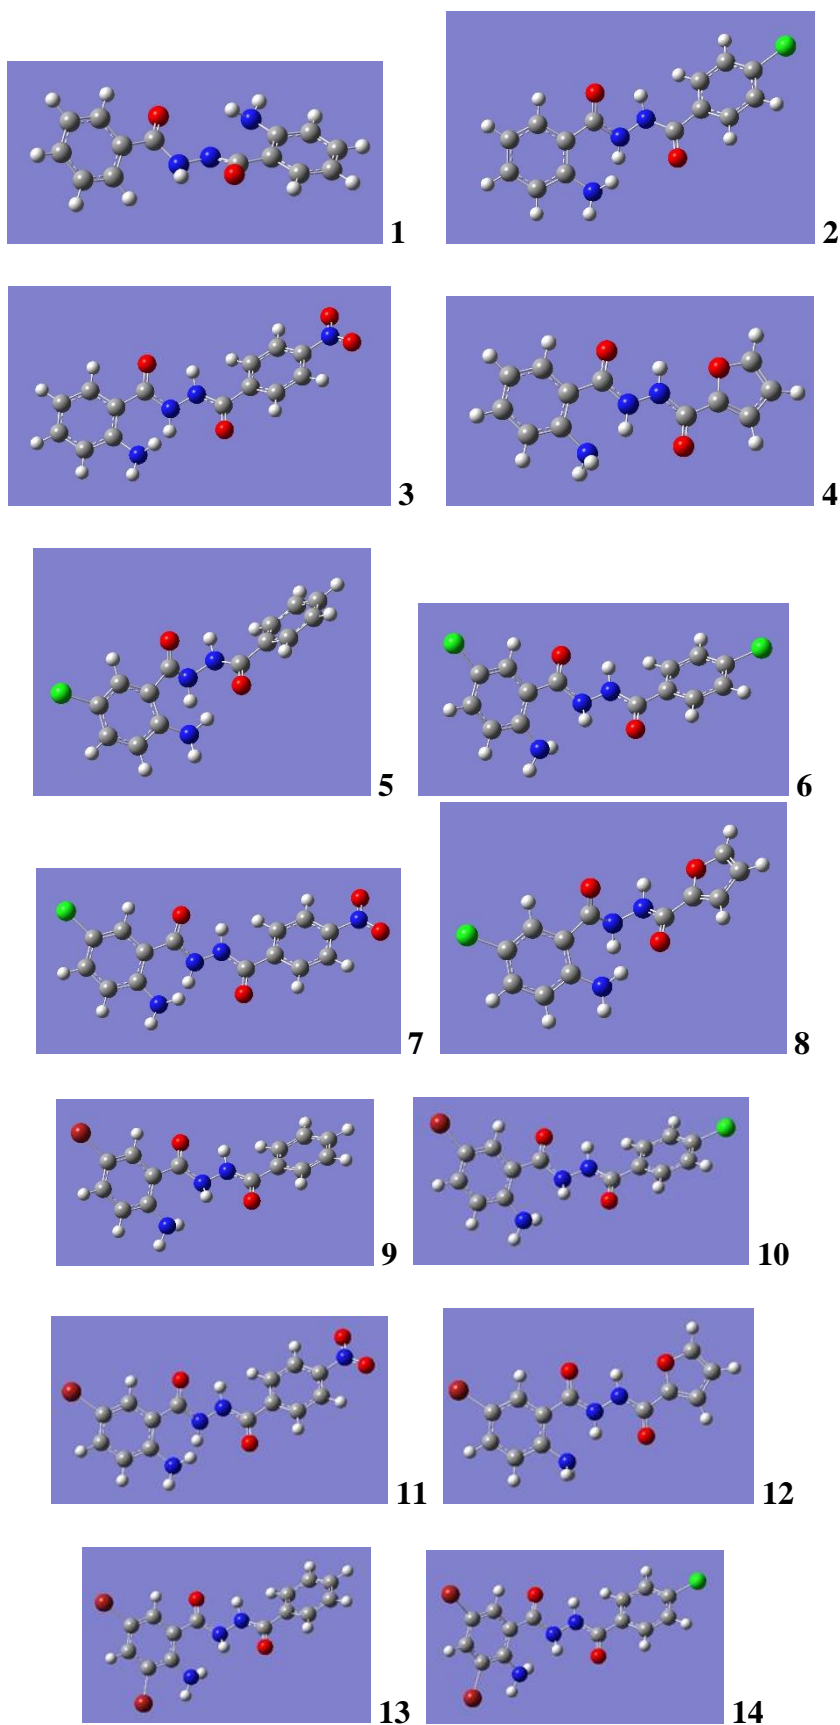



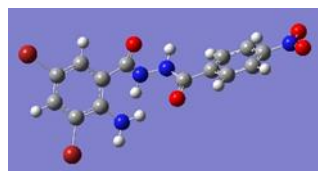

15

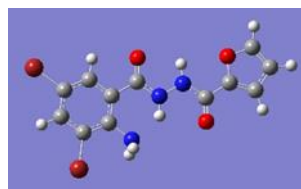

16

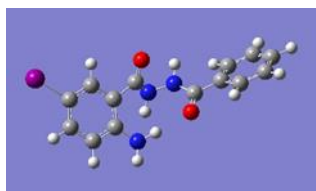

17

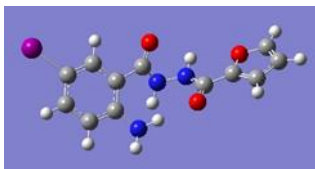

18

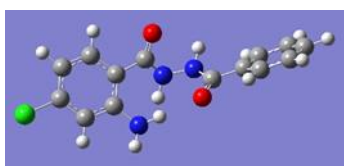

19

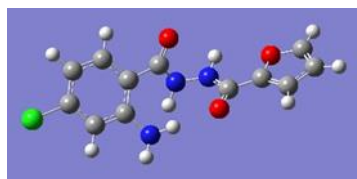

20

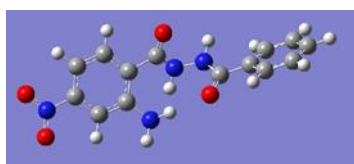

21

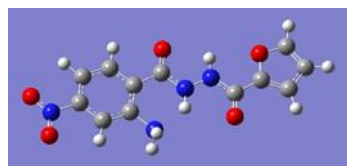

22

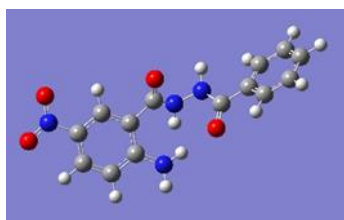

23

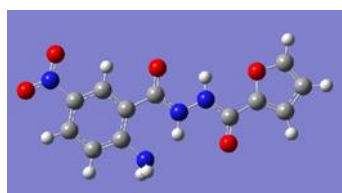

24

## S.7. Molecular Docking Studies for the compounds 1-24

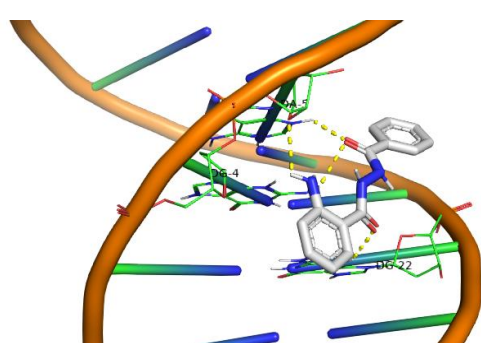

(1)

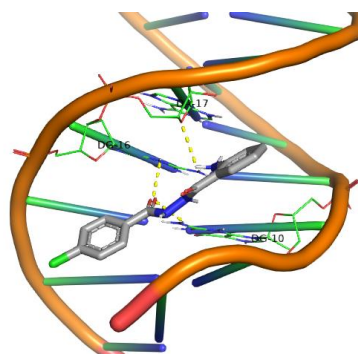

(2)

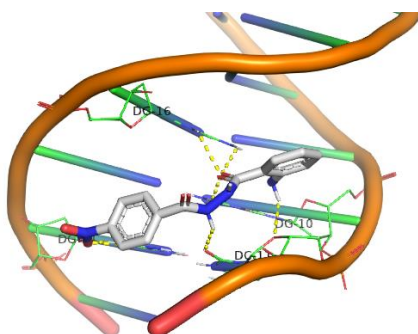

(3)

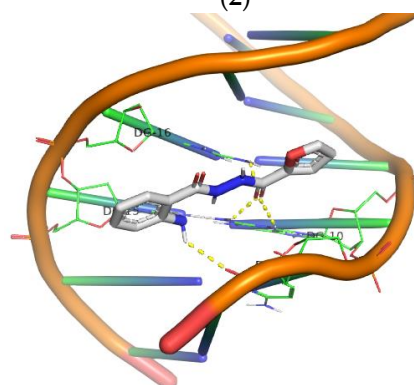

(4)

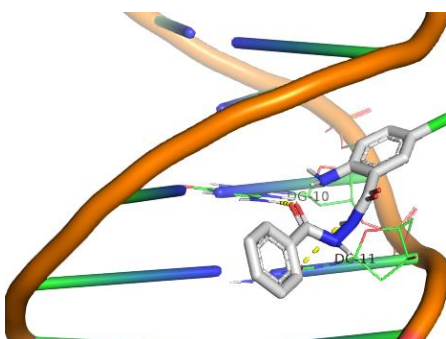

(5)

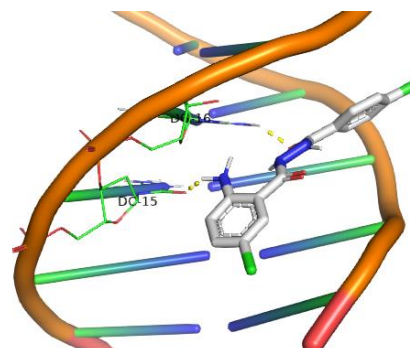

(6)

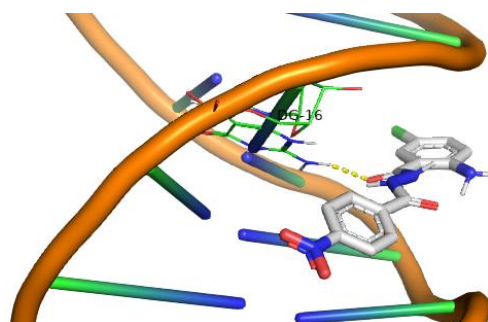

(7)

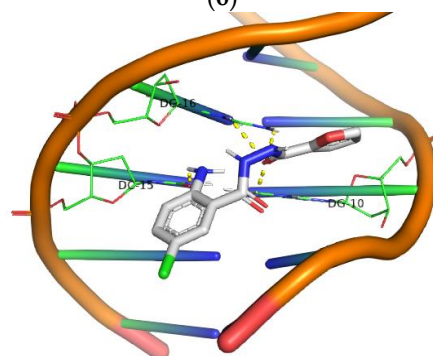

(8)

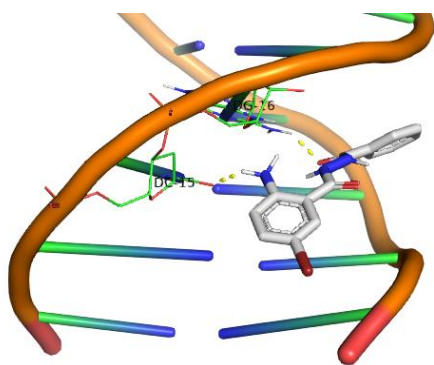

(9)

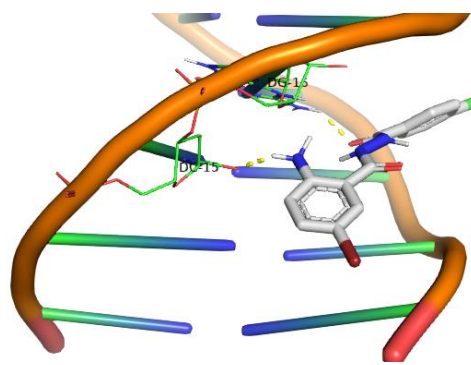

(10)

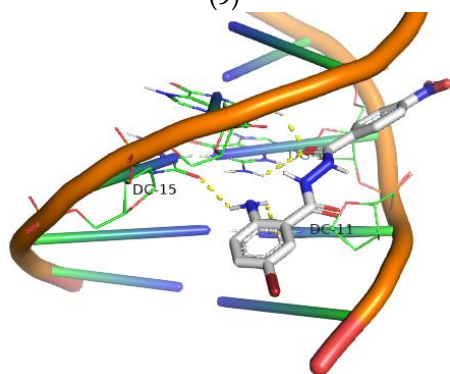

(11)

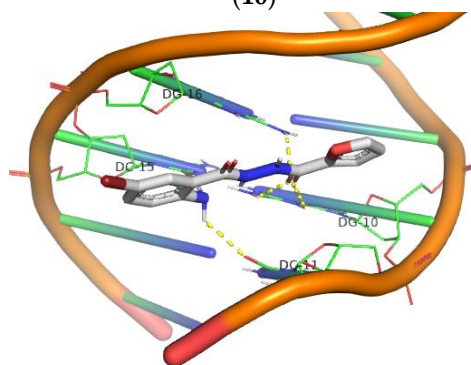

(12)

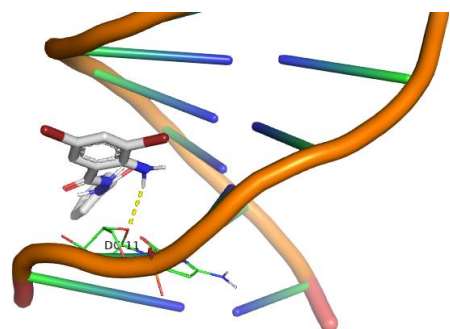

(13)

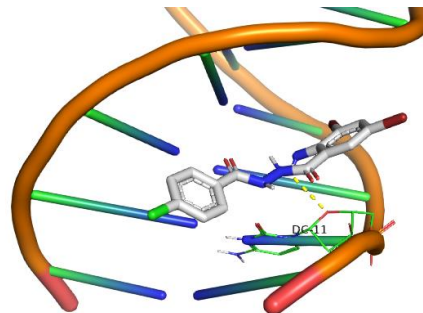

(14)

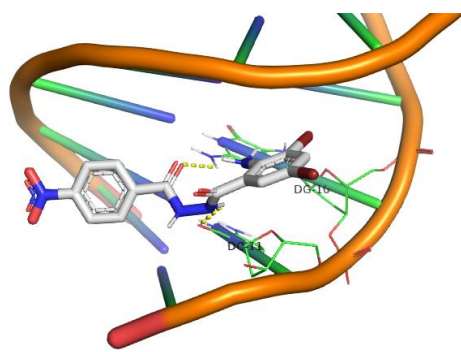

(15)

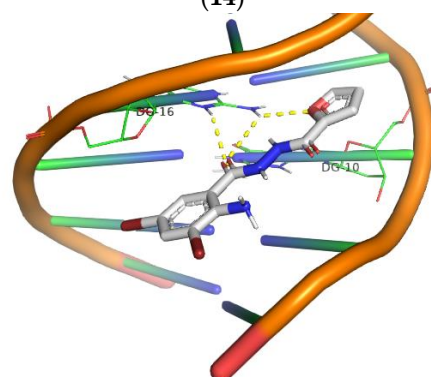

(16)

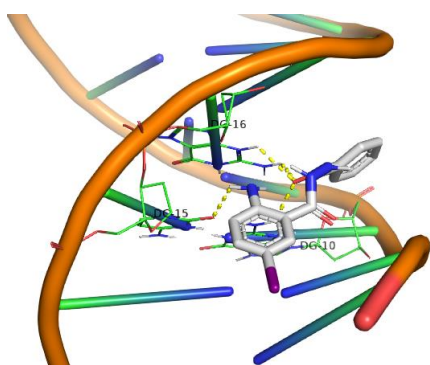

(17)

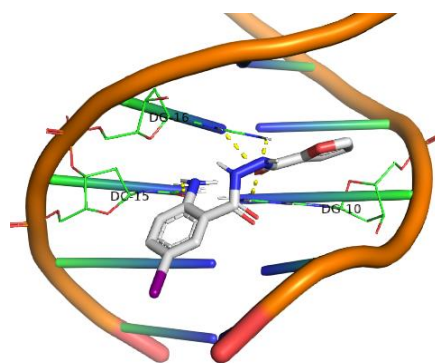

(18)

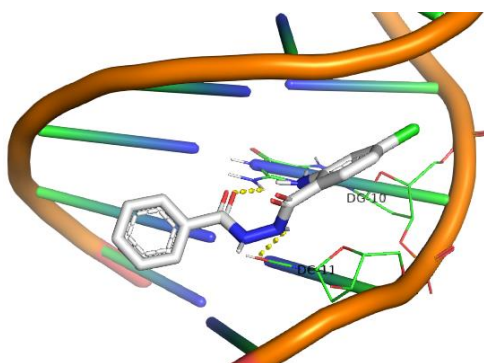

(19)

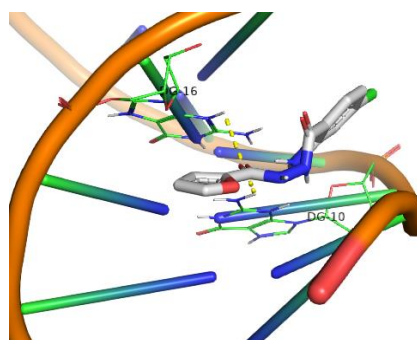

(20)

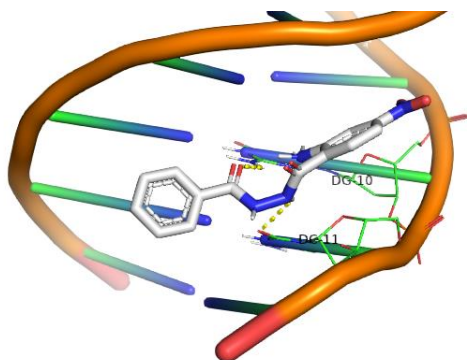

(21)

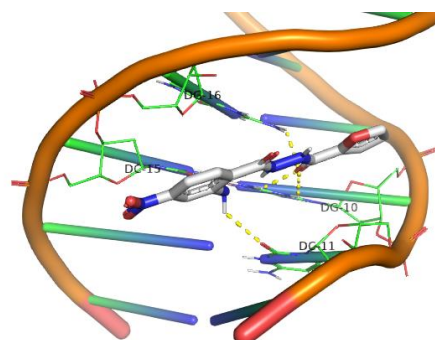

(22)

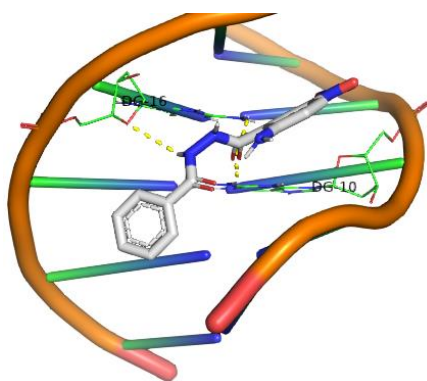

(23)

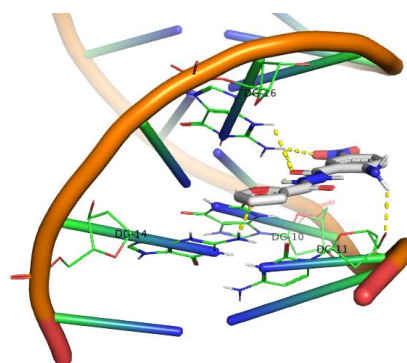

(24)
